# Supplementary material for: Do insomnia and/or sleep disturbances predict the onset, relapse or worsening of depression in community and clinical samples of children and youth? Protocol for a systematic review and meta-analysis
Source: PubMed Central journal article supplement — BMJ Open. 2020 Aug 30;10(8):e034606. doi: 10.1136/bmjopen-2019-034606 (PMC7462160; doi:10.1136/bmjopen-2019-034606), 2020-08-30
Supplement: bmjopen-2019-034606.draft_revisions.pdf [file bmjopen-2019-034606.draft_revisions.pdf]

# BMJ Open

BMJ Open is committed to open peer review. As part of this commitment we make the peer review history of every article we publish publicly available.

When an article is published we post the peer reviewers' comments and the authors' responses online. We also post the versions of the paper that were used during peer review. These are the versions that the peer review comments apply to.

The versions of the paper that follow are the versions that were submitted during the peer review process. They are not the versions of record or the final published versions. They should not be cited or distributed as the published version of this manuscript.

BMJ Open is an open access journal and the full, final, typeset and author-corrected version of record of the manuscript is available on our site with no access controls, subscription charges or pay-per-view fees (<http://bmjopen.bmj.com>).

If you have any questions on BMJ Open's open peer review process please email [info.bmjopen@bmj.com](mailto:info.bmjopen@bmj.com)

# BMJ Open

**In clinical and community-based samples, do insomnia and/or sleep disturbances compared to typical sleep predict child and youth depression? Protocol for a systematic review and meta-analysis**

|                               |                                                                                                                                                                                                                                                                                                                                                                                                                                                                    |
|-------------------------------|--------------------------------------------------------------------------------------------------------------------------------------------------------------------------------------------------------------------------------------------------------------------------------------------------------------------------------------------------------------------------------------------------------------------------------------------------------------------|
| Journal:                      | <i>BMJ Open</i>                                                                                                                                                                                                                                                                                                                                                                                                                                                    |
| Manuscript ID                 | bmjopen-2019-034606                                                                                                                                                                                                                                                                                                                                                                                                                                                |
| Article Type:                 | Protocol                                                                                                                                                                                                                                                                                                                                                                                                                                                           |
| Date Submitted by the Author: | 27-Sep-2019                                                                                                                                                                                                                                                                                                                                                                                                                                                        |
| Complete List of Authors:     | marino, cecilia; Centre for Addiction and Mental Health, Andrade, Brendan; University of Toronto Department of Psychiatry, Aitken, Madison; Centre for Addiction and Mental Health Bonato, Sarah; Centre for Addiction and Mental Health Centre for Addiction and Mental Health, Library Services Haltigan, John; Centre for Addiction and Mental Health Wang, Wei; Centre for Addiction and Mental Health Szatmari, Peter; Centre for Addiction and Mental Health |
| Keywords:                     | SLEEP MEDICINE, Depression & mood disorders < PSYCHIATRY, Child & adolescent psychiatry < PSYCHIATRY, longitudinal studies, systematic review                                                                                                                                                                                                                                                                                                                      |
|                               |                                                                                                                                                                                                                                                                                                                                                                                                                                                                    |

SCHOLARONE™  
Manuscripts

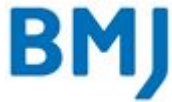

I, the Submitting Author has the right to grant and does grant on behalf of all authors of the Work (as defined in the below author licence), an exclusive licence and/or a non-exclusive licence for contributions from authors who are: i) UK Crown employees; ii) where BMJ has agreed a CC-BY licence shall apply, and/or iii) in accordance with the terms applicable for US Federal Government officers or employees acting as part of their official duties; on a worldwide, perpetual, irrevocable, royalty-free basis to BMJ Publishing Group Ltd ("BMJ") its licensees and where the relevant Journal is co-owned by BMJ to the co-owners of the Journal, to publish the Work in this journal and any other BMJ products and to exploit all rights, as set out in our [licence](#).

The Submitting Author accepts and understands that any supply made under these terms is made by BMJ to the Submitting Author unless you are acting as an employee on behalf of your employer or a postgraduate student of an affiliated institution which is paying any applicable article publishing charge ("APC") for Open Access articles. Where the Submitting Author wishes to make the Work available on an Open Access basis (and intends to pay the relevant APC), the terms of reuse of such Open Access shall be governed by a Creative Commons licence – details of these licences and which [Creative Commons](#) licence will apply to this Work are set out in our licence referred to above.

Other than as permitted in any relevant BMJ Author's Self Archiving Policies, I confirm this Work has not been accepted for publication elsewhere, is not being considered for publication elsewhere and does not duplicate material already published. I confirm all authors consent to publication of this Work and authorise the granting of this licence.

1  
2  
3 **In clinical and community-based samples, do insomnia and/or sleep disturbances compared to**  
4 **typical sleep predict child and youth depression? Protocol for a systematic review and meta-**  
5 **analysis**  
6  
7  
8  
9

10 Cecilia Marino<sup>1,2</sup>, Brendan Andrade<sup>1,2</sup>, Madison Aitken,<sup>1,2</sup> Sarah Bonato<sup>1</sup>, John Haltigan<sup>1,2</sup>, Wei Wang<sup>1,2</sup> and  
11 Peter Szatmari<sup>1,2,3</sup>  
12

13  
14 <sup>1</sup> Cundill Centre for Child and Youth Depression, Center for Addiction and Mental Health, Toronto, Canada

15  
16 <sup>2</sup> Department of Psychiatry, University of Toronto, Toronto, Canada

17  
18 <sup>3</sup> Hospital for Sick Children, Toronto, Ontario, Canada

19  
20 Corresponding author: Cecilia Marino, Centre for Addiction and Mental Health (CAMH), 80 Workman Way,  
21 Room 1236, Toronto, ON M6J 1H4, e-mail: [cecilia.marino@utoronto.ca](mailto:cecilia.marino@utoronto.ca), Tel: 416-535-8501 Ext. 35134  
22

23  
24 Brendan Andrade, [Brendan.Andrade@camh.ca](mailto:Brendan.Andrade@camh.ca)

25  
26 Madison Aitken, [Madison.Aitken@camh.ca](mailto:Madison.Aitken@camh.ca)

27  
28 Sarah Bonato, [Sarah.Bonato@camh.ca](mailto:Sarah.Bonato@camh.ca)

29  
30 John Haltigan, [John.Haltigan@camh.ca](mailto:John.Haltigan@camh.ca)

31  
32 Wei Wang, [Wei.Wang@camh.ca](mailto:Wei.Wang@camh.ca)

33  
34 Peter Szatmari, [peter.szatmari@utoronto.ca](mailto:peter.szatmari@utoronto.ca)  
35  
36  
37  
38  
39  
40

41 **Abstract**

42  
43 **Introduction**

44  
45 Disturbed sleep represents a potentially important modifiable risk factor for the development of depression  
46 in children and youth. This protocol for a systematic review proposes to investigate whether insomnia  
47 and/or sleep disturbances predict child and youth depression in community and clinical-based samples.  
48  
49

50  
51 **Methods and analysis**

52  
53 The protocol adheres to the Preferred Reporting Items for Systematic Review and Meta-Analysis protocols  
54 (PRISMA-P) guidelines. English-written, prospective, longitudinal observational studies that quantitatively  
55 estimated the prediction of depression by insomnia and/or sleep disturbances in individuals 5-24 years of  
56 age will be included. EMBASE, MEDLINE, PsychINFO, Scopus and Web of Science and grey literature will  
57 be searched from 1980 to the present. For the selection of studies, two reviewers will be involved. Data  
58  
59  
60

1  
2  
3 extraction will be conducted by one author and checked independently by a second author using a pre-  
4 defined data extraction form. Risk of bias will be appraised using the Research Triangle Institute Item Bank  
5 (RTI-IB) tool. Heterogeneity will be measured using the  $I^2$  statistic. Meta-analysis will be carried out if  $I^2 \leq$   
6  
7 75% and if  $\geq 3$  results are available and if outcome measures can be pooled. The random-effect model will  
8  
9 be used if  $I^2 \geq 50$  is detected, otherwise the fixed-effect model. Results of the meta-analyses will be  
10  
11 summarized by a forest plot. Analyses will be performed in subgroups stratified by key variables, e.g. risk of  
12  
13 bias score, type of ascertainment, type of sleep disturbance, measurement of outcome, presence of  
14  
15 baseline comorbidity, sample size, age group, gender. Subgroups will be defined depending on the amount  
16  
17 and type of information retrieved.

18  
19  
20 A narrative synthesis will be conducted in place of the meta-analysis, should pooling of data not be  
21  
22 possible. Quality of evidence will be rated using the Grading of Recommendations Assessment,  
23  
24 Development, and Evaluation (GRADE) guidelines.

### 25 26 27 28 **Strengths and limitations of this study**

- 29  
30 • This is a protocol for a systematic review and meta-analysis of existing prospective, longitudinal  
31  
32 evidence on insomnia and/or sleep disturbances predicting depression in children and youth.
- 33  
34 • This protocol will adhere to the Preferred Reporting Items for Systematic review and Meta-Analysis  
35  
36 protocols (PRISMA-P) guidelines
- 37  
38 • This protocol is registered at PROSPERO, the international prospective register of systematic  
39  
40 reviews
- 41  
42 • Full-text screening and extraction will be performed by two reviewers. Any uncertainty regarding  
43  
44 selection will be resolved by consensus and if necessary, by a third reviewer.
- 45  
46 • With regards to limitations, the review will not include treatment studies and will include only  
47  
48 English-written articles. We include individuals aged 5-24 years, therefore excluding studies on  
49  
50 child and youth disturbed sleep predicting depression at later stages of life.

51  
52  
53  
54  
55 **Ethics and dissemination** As this is a protocol for systematic review and meta-analysis of published data,  
56  
57 ethics review and approval are not required. The findings will be published in a peer-reviewed journal and  
58  
59 disseminated at scientific conferences and to patient advocacy organizations.

1  
2  
3 **Trial registration number: International Prospective Register for Systematic Reviews (PROSPERO)**  
4 **registration number CRD42019136729.**  
5  
6  
7  
8  
9

## 10 **Introduction**

11  
12 Depression affects 2-4% of children and 11% of youth between 13 and 18 years of age, and peaks at 20  
13 years of age<sup>1</sup> with disrupting effects on normative developmental trajectories. Prevalence is equal for both  
14 sexes prior to puberty, then it is higher in females.<sup>2</sup> Treatment shows limited efficacy,<sup>3-5</sup> suggesting that  
15 prevention may be a more effective resource to reduce the incidence of depression.  
16  
17

18 Targeting modifiable risk factors of illnesses is becoming a relevant therapeutic strategy for disease  
19 prevention.<sup>6</sup> Among modifiable risk factors predicting child and youth depression, insomnia is increasingly  
20 recognized as an important component of the complex and multi-factorial causal pathway of depression.<sup>7</sup>  
21 Treating insomnia to specifically reduce the incidence and/or severity of depression has been the focus of  
22 controlled, high quality, randomized treatment studies in depressed or at risk for depression adult or elderly  
23 individuals.<sup>8,9</sup> In a recent meta-analysis, internet-based cognitive behavioural therapy (CBT) for insomnia  
24 had a significant, small effect on comorbid depression in individuals older than 18 years.<sup>10</sup>  
25  
26

27 Similar evidence in younger individuals is scarce, mostly consists of studies with small sample size/no  
28 follow-up, and it is limited to individuals older than 12 years of age<sup>11-17</sup>.  
29  
30

31 In a randomized controlled trial, CBT for insomnia for six weekly sessions and a booster session after 2  
32 months was significantly more effective in decreasing comorbid depression compared to waitlist in 12-19-  
33 year-old individuals with DSM-5 insomnia and no comorbid psychiatric disorders. The effect was large, was  
34 maintained after 12 months, and was fully mediated by the reduction of insomnia symptoms.<sup>16</sup>  
35  
36

37 In a longitudinal, randomised controlled trial study (SENSE, i.e. Sleep and Education: learning New Skills  
38 Early) the preventative effect on the incidence of depression in at risk for depression, 12-17-year-old  
39 adolescents with sleeping difficulties is investigated.<sup>12</sup> The interventions consist of seven weekly sessions of  
40 either a CBT/mindfulness-based sleep intervention or an active control intervention, followed by two booster  
41 sessions after three and six months post-intervention. One-hundred-twenty-three participants have  
42 completed the interventions,<sup>13,14</sup> however findings regarding the main outcomes of the study (preventative  
43 effects of depression) from the two-year follow-up are not available yet.  
44  
45

46 It is currently not known whether treating sleep problems in affected or unaffected, at risk for depression  
47 children (e.g. children with history of abuse, with high emotional dysregulation, offspring of depressed  
48  
49  
50  
51  
52  
53  
54  
55  
56  
57  
58  
59  
60

1  
2  
3 parents) would lead to a lower incidence of depression than it would be if sleep problems were not  
4 treated.<sup>18</sup> To understand whether earlier prevention efforts could be more effective, a precise quantitative  
5 estimate of the prediction of depression by insomnia in the entire developmental population, including  
6 clinical and non-clinical individuals, is needed.  
7  
8  
9

10 Insomnia consists of clinically significant long sleep-onset latency and/or awakening after sleep onset  
11 and/or early-morning awakening, accompanied by diurnal tiredness and functional impairment. Prevalence  
12 of insomnia is 19.5% in children, equally distributed among boys and girls; in youth, prevalence is 17.4%,  
13 and higher among girls.<sup>19</sup>  
14  
15  
16  
17

18 Six systematic reviews have summarized cohort studies on insomnia predicting depression.<sup>20-25</sup> Estimates  
19 of the meta-analytic odds ratios are consistent across studies ranging 2.10-2.83,<sup>21 24</sup> and across subgroups  
20 stratified by the most common confounders, e.g. sex (male: 1.46; females: 1.96), type of ascertainment  
21 (clinical: 2.05; non-clinical: 2.34), and age (elderly 1.87-1.92; adults: 2.50).<sup>23</sup>  
22  
23  
24  
25

26 However, only three of the six systematic reviews included subjects younger than 18 years,<sup>21 22</sup> and a meta-  
27 analytic estimate, i.e. odds ratio= 2.0, was provided by only one of the three reviews.<sup>21</sup> This estimate was  
28 based on studies up to 2010, and included only three studies.<sup>26-28</sup> Li et al. updated and used the same  
29 selection criteria of Baglioni et al.<sup>21</sup> and although fifteen new cohort studies were added, no new studies on  
30 children and youth were included. Finally, Pigeon et al.<sup>22</sup> summarized studies published from 2014 to 2017;  
31 four studies on children and youth were included, of which three supported insomnia predicting  
32 depression,<sup>29-31</sup> and one found no such association.<sup>32</sup> In sum, while it is well established that insomnia is a  
33 risk factor for depression in adults and the elderly,<sup>20-24</sup> an updated systematic review and meta-analysis on  
34 whether insomnia predicts child and youth depression is missing. The most recent review for children and  
35 youth is based on studies up to 2010 and all three systematic reviews of this age group excluded studies  
36 which did not control for baseline depression. This led to a greatly reduced number of studies. While the  
37 rationale of this choice is clear for studies of risk and prediction, it might not have been the ideal choice,  
38 due to the overall paucity of studies in the child and youth age-range compared to other age groups.  
39  
40  
41  
42  
43  
44  
45  
46  
47  
48  
49

50 Including studies that did not control for baseline depression would allow testing of whether there are  
51 significant differences in the meta-analytic estimates between studies controlling versus not-controlling for  
52 this variable. If no differences are found, studies not controlling for baseline depression could contribute to  
53 the pooled data with an overall increase of the precision for the estimate of the meta-analytic effects.  
54  
55  
56  
57

58 There is also some evidence available on whether sleep disturbances other than insomnia predicts child  
59 and youth depression.<sup>33-42</sup> This may include increased/short/disrupted sleep duration with/without diurnal  
60

1  
2  
3 sleepiness, sleepwalking/talking, nightmares, bedwetting, breathing-related sleep disorders, and/or  
4 circadian disturbances. Furthermore, sleep disturbances more broadly defined may include challenges  
5 either generically defined with regards to duration and consistency over time, measured by self-reported  
6 questionnaires, interview or by EEG/actigraph-based measures, and scored by either single-item or  
7 cumulative scores. A recent meta-analysis summarized studies testing the association of broadly defined  
8 sleep disturbances on depression in 12-20-year-old already clinically depressed subjects. In all selected  
9 studies,<sup>43-49</sup> sleep was defined by EEG-based, objective measures. Estimates of the meta-analytic effects  
10 identified that EEG-based longer sleep onset latency, more wake after sleep onset and lower sleep efficiency  
11 were significant predictors of depression compared to typical sleep (effect sizes ranging .43-.58).<sup>50</sup>  
12 Although findings from this review are of crucial importance for potential secondary prevention programs in  
13 depressed youth, it would be useful to have summarized data on the longitudinal association of broadly  
14 defined sleep disturbances with depression on the entire developmental population, including non-clinical  
15 individuals as well as a broader age range, which would allow to apply findings to primary prevention and/or  
16 early intervention programs.

17  
18  
19  
20  
21  
22  
23  
24  
25  
26  
27  
28  
29  
30 Finally, insomnia and/or sleep disturbances are often associated to comorbid psychiatric and medical  
31 conditions.<sup>18</sup> Most previous knowledge synthesis studies have excluded comorbidities, limiting the  
32 generalizability and transferability of findings. For this reason, in this systematic review studies focusing on  
33 both primary and comorbid insomnia and/or sleep disturbances will be included. To understand the extent  
34 to which insomnia and/or sleep disturbances have a distinct risk to depression across comorbid disorders,  
35 subgroup analyses will be performed.

36  
37  
38  
39  
40  
41  
42  
43  
44  
45  
46  
47  
48  
49  
50  
51  
52 Understanding whether insomnia and/or sleep disturbances significantly increase the risk of depression in  
53 children and youth could lead to variation in clinical practice and inform policy development. Preventive  
54 strategies could include treating sleep problems starting as early as childhood. This is particularly important  
55 in light of evidence on the differential effectiveness of a number of treatment for sleep problems (e.g.  
56 melatonin,<sup>51 52</sup> cognitive behavioural therapy,<sup>53</sup> physical exercise,<sup>54</sup> and bright light therapy<sup>55</sup>) and the fact  
57 that sleep problems in children are under-diagnosed<sup>56</sup> and rarely treated.<sup>57</sup>

58  
59  
60  
61  
62  
63  
64  
65  
66  
67  
68  
69  
70  
71  
72  
73  
74  
75  
76  
77  
78  
79  
80  
81  
82  
83  
84  
85  
86  
87  
88  
89  
90  
91  
92  
93  
94  
95  
96  
97  
98  
99  
100  
101  
102  
103  
104  
105  
106  
107  
108  
109  
110  
111  
112  
113  
114  
115  
116  
117  
118  
119  
120  
121  
122  
123  
124  
125  
126  
127  
128  
129  
130  
131  
132  
133  
134  
135  
136  
137  
138  
139  
140  
141  
142  
143  
144  
145  
146  
147  
148  
149  
150  
151  
152  
153  
154  
155  
156  
157  
158  
159  
160  
161  
162  
163  
164  
165  
166  
167  
168  
169  
170  
171  
172  
173  
174  
175  
176  
177  
178  
179  
180  
181  
182  
183  
184  
185  
186  
187  
188  
189  
190  
191  
192  
193  
194  
195  
196  
197  
198  
199  
200  
201  
202  
203  
204  
205  
206  
207  
208  
209  
210  
211  
212  
213  
214  
215  
216  
217  
218  
219  
220  
221  
222  
223  
224  
225  
226  
227  
228  
229  
230  
231  
232  
233  
234  
235  
236  
237  
238  
239  
240  
241  
242  
243  
244  
245  
246  
247  
248  
249  
250  
251  
252  
253  
254  
255  
256  
257  
258  
259  
260  
261  
262  
263  
264  
265  
266  
267  
268  
269  
270  
271  
272  
273  
274  
275  
276  
277  
278  
279  
280  
281  
282  
283  
284  
285  
286  
287  
288  
289  
290  
291  
292  
293  
294  
295  
296  
297  
298  
299  
300  
301  
302  
303  
304  
305  
306  
307  
308  
309  
310  
311  
312  
313  
314  
315  
316  
317  
318  
319  
320  
321  
322  
323  
324  
325  
326  
327  
328  
329  
330  
331  
332  
333  
334  
335  
336  
337  
338  
339  
340  
341  
342  
343  
344  
345  
346  
347  
348  
349  
350  
351  
352  
353  
354  
355  
356  
357  
358  
359  
360  
361  
362  
363  
364  
365  
366  
367  
368  
369  
370  
371  
372  
373  
374  
375  
376  
377  
378  
379  
380  
381  
382  
383  
384  
385  
386  
387  
388  
389  
390  
391  
392  
393  
394  
395  
396  
397  
398  
399  
400  
401  
402  
403  
404  
405  
406  
407  
408  
409  
410  
411  
412  
413  
414  
415  
416  
417  
418  
419  
420  
421  
422  
423  
424  
425  
426  
427  
428  
429  
430  
431  
432  
433  
434  
435  
436  
437  
438  
439  
440  
441  
442  
443  
444  
445  
446  
447  
448  
449  
450  
451  
452  
453  
454  
455  
456  
457  
458  
459  
460  
461  
462  
463  
464  
465  
466  
467  
468  
469  
470  
471  
472  
473  
474  
475  
476  
477  
478  
479  
480  
481  
482  
483  
484  
485  
486  
487  
488  
489  
490  
491  
492  
493  
494  
495  
496  
497  
498  
499  
500  
501  
502  
503  
504  
505  
506  
507  
508  
509  
510  
511  
512  
513  
514  
515  
516  
517  
518  
519  
520  
521  
522  
523  
524  
525  
526  
527  
528  
529  
530  
531  
532  
533  
534  
535  
536  
537  
538  
539  
540  
541  
542  
543  
544  
545  
546  
547  
548  
549  
550  
551  
552  
553  
554  
555  
556  
557  
558  
559  
560  
561  
562  
563  
564  
565  
566  
567  
568  
569  
570  
571  
572  
573  
574  
575  
576  
577  
578  
579  
580  
581  
582  
583  
584  
585  
586  
587  
588  
589  
590  
591  
592  
593  
594  
595  
596  
597  
598  
599  
600  
601  
602  
603  
604  
605  
606  
607  
608  
609  
610  
611  
612  
613  
614  
615  
616  
617  
618  
619  
620  
621  
622  
623  
624  
625  
626  
627  
628  
629  
630  
631  
632  
633  
634  
635  
636  
637  
638  
639  
640  
641  
642  
643  
644  
645  
646  
647  
648  
649  
650  
651  
652  
653  
654  
655  
656  
657  
658  
659  
660  
661  
662  
663  
664  
665  
666  
667  
668  
669  
670  
671  
672  
673  
674  
675  
676  
677  
678  
679  
680  
681  
682  
683  
684  
685  
686  
687  
688  
689  
690  
691  
692  
693  
694  
695  
696  
697  
698  
699  
700  
701  
702  
703  
704  
705  
706  
707  
708  
709  
710  
711  
712  
713  
714  
715  
716  
717  
718  
719  
720  
721  
722  
723  
724  
725  
726  
727  
728  
729  
730  
731  
732  
733  
734  
735  
736  
737  
738  
739  
740  
741  
742  
743  
744  
745  
746  
747  
748  
749  
750  
751  
752  
753  
754  
755  
756  
757  
758  
759  
760  
761  
762  
763  
764  
765  
766  
767  
768  
769  
770  
771  
772  
773  
774  
775  
776  
777  
778  
779  
780  
781  
782  
783  
784  
785  
786  
787  
788  
789  
790  
791  
792  
793  
794  
795  
796  
797  
798  
799  
800  
801  
802  
803  
804  
805  
806  
807  
808  
809  
810  
811  
812  
813  
814  
815  
816  
817  
818  
819  
820  
821  
822  
823  
824  
825  
826  
827  
828  
829  
830  
831  
832  
833  
834  
835  
836  
837  
838  
839  
840  
841  
842  
843  
844  
845  
846  
847  
848  
849  
850  
851  
852  
853  
854  
855  
856  
857  
858  
859  
860  
861  
862  
863  
864  
865  
866  
867  
868  
869  
870  
871  
872  
873  
874  
875  
876  
877  
878  
879  
880  
881  
882  
883  
884  
885  
886  
887  
888  
889  
890  
891  
892  
893  
894  
895  
896  
897  
898  
899  
900  
901  
902  
903  
904  
905  
906  
907  
908  
909  
910  
911  
912  
913  
914  
915  
916  
917  
918  
919  
920  
921  
922  
923  
924  
925  
926  
927  
928  
929  
930  
931  
932  
933  
934  
935  
936  
937  
938  
939  
940  
941  
942  
943  
944  
945  
946  
947  
948  
949  
950  
951  
952  
953  
954  
955  
956  
957  
958  
959  
960  
961  
962  
963  
964  
965  
966  
967  
968  
969  
970  
971  
972  
973  
974  
975  
976  
977  
978  
979  
980  
981  
982  
983  
984  
985  
986  
987  
988  
989  
990  
991  
992  
993  
994  
995  
996  
997  
998  
999  
1000

The purpose of this protocol is to outline a methods for a systematic review and meta-analysis of data from prospective, longitudinal studies in clinical and community-based samples of children and youth investigating the role of insomnia and/or sleep disturbances compared to typical sleep as predictors of depression. “Do children and youth with insomnia and/or sleep disturbance have higher rates of later depression than children and youth without insomnia and/or sleep disturbance”?



Our study will add to the currently available knowledge synthesis in that:

1. It will provide an updated meta-analytic estimate of the effects of insomnia predicting child and youth depression, adding studies from 2010 onward compared to Baglioni et al.<sup>21</sup>
2. By including studies on 5-24-year-old subjects from both clinical and non-clinical populations, it will provide a more comprehensive and updated meta-analytic estimate compared to Lovato and Gradisar<sup>50</sup>
3. It will include studies whether controlling for baseline depression or not
4. It will include studies of both primary and comorbid insomnia and/or sleep disturbances

Furthermore, we aim to explore the sources of potential heterogeneity and examine the robustness of the primary hypothesis against key confounding variables. Specifically, our secondary aim is to address whether the prediction of child and youth depression by insomnia and/or sleep disturbances significantly differ between studies controlling versus not controlling for baseline depression, and more generally between studies stratified by key variables, e.g. risk of bias score, type of ascertainment, type of sleep disturbance, measurement of outcome, presence of baseline comorbidity, sample size, age group, gender. Subgroups will be defined depending on the amount and type of information retrieved.

## Methods

For the protocol, we will follow the guidelines outlined in "Preferred Reporting Items for Systematic review and Meta-Analysis protocols (PRISMA-P)".<sup>58</sup> For the final report we will follow the guidelines set in "Meta-analysis Of Observational Studies in Epidemiology: a proposal for reporting" (MOOSE).<sup>59</sup>

## Inclusion criteria

### Study types

This study will include (1) English-written, (2) prospective, longitudinal observational studies that quantitatively estimated the prediction of depression by insomnia and/or sleep disturbances in children and youth. Only those studies reporting descriptive statistics, analyses of trajectories, effect sizes, odds ratios,  $\beta$  scores, frequency, hazard or relative risk will be selected. Grey literature including relevant dissertations/PhD theses and key conference publications will be included. Case series, case reports, systematic reviews, meta-analyses, as well as experimental, retrospective, cross-sectional, treatment, theoretical and position studies will be excluded.

### **Population type**

Studies focusing on subjects aged 5-24 years belonging to either community or clinical based samples with any comorbid psychiatric/neurological/medical diagnosis will be included.

### **Exposure**

Studies will be included if focusing on either one of the following two exposures:

1. Insomnia, defined as clinically significant difficulty in initiating or maintaining sleep or non-restorative sleep, as based on DSM III and later versions. Although the criterion of daytime impairment is required to define clinically significant insomnia, it has been shown that the meta-analytic odds ratio of insomnia predicting depression when this criterion is taken into account<sup>24</sup> is of comparable magnitude relative to the ones obtained when this criterion is not considered (Baglioni et al. 2011; Li et al. 2016).<sup>21</sup> Therefore, to allow for inclusion of the highest number of studies, daytime impairment will be free to vary.
2. Sleep disturbances, defined as increased/short/disrupted sleep duration with or without daytime fatigue/sleepiness, nightmares/terror attacks, circadian disturbances, and/or night walking/talking. Sleep disturbances can be generically defined with regards to duration and consistency over time, and can be based on subjective and/or EEG/actigraph-based, objective measures. Measures can be based on single or multiple items, or a cumulative score of various items. Narcolepsy, breathing-related sleep disorders, central sleep apnea, non-rapid/rapid eye movement sleep disorder, restless legs syndrome, substance/medication-induced sleep disorder, and enuresis nocturna primaria may also be included.

Exposures' assessment can be administered by a clinician, a researcher, or based on self-report, parent-report, and/or teacher-report questionnaires.

### **Outcome**

Studies will be included if they focus on either one of the following outcomes: major depressive disorder, depressive disorder not otherwise specified, dysthymic disorder, and/or dimensional construct of depression, internalizing disorders or anxious depression. Studies focusing on anxiety without a measure of depression will not be included. Outcome is measured by standardized and validated tools administered by a clinician, a researcher, and/or based on self-report, parent-report, and/or teacher-report questionnaires.

1  
2  
3 To be included, both exposure and outcome have to be measured at mean age  $\geq 5$  years and  $\leq 24$ . To  
4 address the research question on the role of insomnia and/or sleep disturbances as predictor of depression,  
5 only studies reporting on the exposure measured at least one month before the outcome will be included.  
6  
7 When multiple assessments are conducted on the same cohort, each pair where both exposures and  
8  
9 outcomes are measured at mean age  $\leq 24$  and  $\geq 5$  years and exposures are measured before the outcome  
10  
11 will be considered.  
12  
13  
14  
15

### 16 **Confounders**

17  
18 Studies will be included regardless of whether they contain estimates adjusted for common confounding  
19  
20 factors, such as sex, socio-economic status, demographics, type of comorbidity at baseline. Studies that do  
21  
22 not control for common confounding factors will be highlighted for potentially confounded results.  
23  
24  
25

### 26 **Identification of eligible studies and data extraction**

#### 27 **Search strategy**

28  
29 The following databases will be searched: EMBASE, MEDLINE, PsychINFO, Scopus and Web of Science. A  
30  
31 draft of the Medline search strategy will be developed using a combination of MeSH and keywords terms  
32  
33 relating to sleep disorders, depression/depressive disorder and children/adolescents/young adults with the  
34  
35 help of a research librarian. The search will be limited to the years 1980 (to focus on current diagnostic  
36  
37 terminology from the DSM III) to the present and will also be limited to observational studies using the search  
38  
39 filter developed by the Scottish Intercollegiate Guidelines Network (SIGN). The draft Medline search will also  
40  
41 be piloted to ensure the sensitivity and efficacy of the final search strategy and will also be reviewed by all of  
42  
43 the participating authors. The finalized Medline search will be adapted for each bibliographic database  
44  
45 individually.  
46

47 The grey literature will be screened for relevant material, including use of the search checklist Grey Matters:  
48  
49 "A Practical Search Tool for Evidence-Based Medicine" from the Canadian Agency for Drugs and  
50  
51 Technologies in Health (CADTH), and by also searching other sources to identify relevant dissertations/PhD  
52  
53 theses and conference publications, i.e. Proquest Dissertations and Theses, ProceedingsFirst, PapersFirst,  
54  
55 Conference Abstracts from Embase, Google Scholar Search. The references of selected articles will also be  
56  
57 hand-searched for eligible studies and all the searches will be re-run just before the final analyses to identify  
58  
59 additional relevant studies. Experts in the field will be contacted to locate potentially eligible studies and/or  
60  
unpublished data.

### ***Selection of studies***

Search results will be exported into Covidence, merged and checked for duplicates. For the selection of studies two students will be involved, with minimum an undergraduate level of education in a health-related field and previous experience with the systematic review methodology. They will be given the systematic review protocol and 5-hour training on the content of the systematic review and basic knowledge of the procedure. For the selection of studies based on title&abstract screening, eligible studies will be selected by two reviewers until at least 80% of agreement is achieved with the remainder being selected by one reviewer. For the selection of studies based on full-text screening, reviewers will perform the selection in duplicate. Any uncertainty regarding selection will be resolved by consensus and if necessary, it will be reviewed by a third reviewer. The PRISMA search flow chart will be used to report the number of studies included and excluded at each step in the process, along with the rationale for the exclusion.

### ***Data extraction***

Data extraction will be conducted by one author and checked independently by a second author using a pre-defined data extraction form. Extracted variables will pertain to the following domains: general study information, study characteristics, participant characteristics, exposures and outcome measures, interval between baseline and follow-up, sample size, how missing data are handled, covariates that were adjusted in the analyses, outcome data, including effect sizes, odds ratio, relative risk or hazard ratio with respective 95% confidence interval. Information on the sources of funding for each study will be retrieved.

Discrepancies between the two authors will be resolved by discussion. When relevant data are missing, corresponding authors will be contacted to obtain the information.

### ***Risk of bias assessment***

Risk of bias of included studies' results will be appraised using the Research Triangle Institute Item Bank (RTI-IB) tool. The RTI-B is a practical, quality-scoring tool for observational studies with a focus on bias and precision.<sup>60</sup> It has a high inter-rater reliability (75%) and consists of 29 items tapping 12 domains (1) background, (2) sample definition and selection, (3) interventions/exposure, (4) outcomes, (5) creation of treatment groups, (6) blinding, (7) soundness of information, (8) follow-up, (9) analysis comparability, (10) analysis outcome, (11) interpretation, and (12) presentation and reporting. Possible response categories to

1  
2  
3 each item are 'yes', 'no', 'partially', 'cannot determine', and 'not applicable'. The quality appraisal will be  
4 performed by two authors independently with discrepancies being resolved by discussion. Results will be  
5 reported narratively and summarized in a descriptive table. Items will be subdivided into six categories:  
6 selection bias/confounding, performance bias, attrition bias, detection bias, reporting bias, and information  
7 bias. Items are scored as high, low, or unclear risk of bias. If at least one item in a category is scored as  
8 high, the risk of bias within this category is scored as moderate risk. If at least 50% of the items in a category  
9 are scored as high, the risk of the category is scored as high. Each study will receive a summary score that  
10 corresponds to the highest score obtained in any category.<sup>60</sup>

### 20 **Data synthesis and analysis**

21 Data will be synthesized by a table reporting study type, participant characteristics, exposure and outcome  
22 measures, and a second table on the risk of bias assessment. The data will be categorised into each type  
23 of exposure, i.e. insomnia and sleep disturbances. Heterogeneity of pooled estimates for each exposure  
24 category will be measured using the  $I^2$  statistic, which represents the percentage of variation attributable to  
25 between-study heterogeneity.  $I^2$  values of 25%, 50%, and 75% will be considered as low, medium, and high  
26 heterogeneity, respectively. Meta-analysis of studies will be carried out if  $I^2 \leq 75\%$  and if  $\geq 3$  results for each  
27 exposure category are available.<sup>61</sup> A narrative synthesis will be conducted in place of the meta-analysis,  
28 should this latter cannot be performed. For the meta-analysis, the random-effect model will be used if  $I^2 \geq$   
29 50 is detected, which is robust against both the between-study and within-study variability, otherwise the  
30 fixed-effect model will be used. Results of the meta-analyses will be summarized by a forest plot.

31 Meta-analyses will be performed in subgroups stratified by key variables if there are  $\geq 3$  studies. Such  
32 variables include risk of bias score, type of ascertainment, type of sleep disturbance, measurement of  
33 outcome, presence of baseline comorbidity, sample size, age group, gender. Subgroups will be defined  
34 depending on the amount and type of information retrieved.

35 To assess sensitivity of the pooled estimate to each included study, we will apply the leave-one-out  
36 method, which consists of repeating the analysis removing one study at a time.<sup>62</sup> Potential publication bias  
37 and other source of bias will be further assessed by visual inspection of the symmetry of funnel plots.

38 Quality of evidence will be rated using the Grading of Recommendations Assessment, Development, and  
39 Evaluation (GRADE) guidelines taking into account risk of bias, applying the RTI-IB tool; heterogeneity;  
40 directness, evaluating the relevance of the sample, the outcomes and the exposure; precision, examining  
41 the 95% confidence interval; and publication bias of the included studies. We will assess inter-rater

1  
2  
3 agreement between investigators for study inclusion, data extraction, and methodological quality  
4  
5 assessment using Kappa Cohen's coefficient.  
6  
7

## 8 **Discussion**

9  
10 This systematic review and meta-analysis will synthesize and quantify the existing evidence on insomnia  
11 and/or sleep disturbances predicting depression in children and youth. While this link is well established  
12 and quantified in adult and elderly populations,<sup>20-24</sup> a comprehensive and updated summary is missing in  
13 children and youth.  
14  
15

16  
17 Understanding the magnitude of the risk of sleep problems predicting later depression in children and youth  
18 will contribute significantly to the development of treatment and secondary prevention strategies of  
19 depression.<sup>4 5 63</sup> Sleep is often impaired in child and youth depression.<sup>64</sup> Treating sleep problems in  
20 childhood can become an adjunctive tool to treat more effectively childhood depression but also to change  
21 the risk trajectories of depression, reducing the incidence and severity of depressive episodes later in life.  
22  
23

24 This study will also potentially inform strategies for primary prevention of depression in healthy children and  
25 youth. Sleep patterns physiologically change from birth to early adulthood as a consequence of a number of  
26 maturational changes in the brain, and as a result of an adjustment to the social environment.<sup>65 66</sup> The most  
27 evident change concerns the duration of sleep, which decreases from approximately 14 hours at 6 months  
28 of age to 8 hours at 16 years of age.<sup>67 68</sup> Another relevant maturational change concerns the sleep-onset  
29 time, which delays up to approximately 2 hours when transitioning to adolescence. This process is typical of  
30 puberty, and it is part of the phase delay of a host of circadian rhythms related to gonadal hormones'  
31 changes. The delay in sleep-onset time, called evening chronotype, manifests at a younger age in females  
32 than males, corresponding to the sex difference in the onset of puberty.<sup>66 69</sup> Evidence shows that over the  
33 last century child and youth sleep has consistently reduced beyond normative maturational changes.<sup>70 71</sup> It  
34 has been claimed that this "epidemic" shortage of sleep might be related to the concomitant occurrence of  
35 the evening chronotype and earlier morning wake-up time of youth compared to younger children.<sup>72</sup> Other  
36 studies claim that decreased sleep in children and youth may instead be due to the increase of electronic  
37 screen media use during late hours.<sup>73</sup> As a result, an increasing proportion of otherwise healthy children  
38 and youth is exposed to insufficient sleep. An open question is whether this newly occurring, sleep-deprived  
39 child and youth cohort is at risk of depression. Understanding if the same risk pathway identified in affected  
40 or at-risk individuals exists also in typically developing children and youth is essential to understand the size  
41  
42  
43  
44  
45  
46  
47  
48  
49  
50  
51  
52  
53  
54  
55  
56  
57  
58  
59  
60

1  
2  
3 and potential consequences of the secular trend toward insufficient sleep and to eventually plan effective  
4 programs of primary prevention to reduce the incidence of depression.  
5  
6  
7

8  
9 **Ethics and dissemination:** As this is a protocol for systematic review and meta-analysis of published data,  
10 ethics review and approval are not required. The findings will be published in a peer-reviewed journal and  
11 disseminated at scientific conferences.  
12

13  
14 **Author contributions:** CM, BA, MA and PS conceived the idea, planned and designed the study protocol.  
15 CM wrote the first draft. SB provided expertise to the search strategy. WW provided expertise to the data  
16 extraction and statistical analysis. JH provided critical insights. All authors have approved and contributed  
17 to the final written manuscript. CM guarantor of the review.  
18  
19

20  
21  
22 **Funding statement:** This work was supported by the Cundill Centre for Child and Youth Depression,  
23 Centre for Addiction and Mental Health, Toronto, Ontario, Canada. Funder's roles consist of evaluating and  
24 funding the grant application if suitable, monitoring and evaluating research outputs, facilitating the  
25 implementation of findings in health care, the interaction between researchers and research users, and the  
26 dissemination research findings.  
27  
28

29  
30  
31 **Competing interests statement.** None declared.  
32

33 **Word Count:** 4,130 words.  
34

35 Patients or the public WERE NOT involved in the design, or conduct, or reporting, or dissemination of our  
36 research  
37  
38  
39  
40

## 41 **References**

- 42  
43 1. Avenevoli S, Swendsen J, He JP, et al. Major depression in the national comorbidity survey-adolescent  
44 supplement: prevalence, correlates, and treatment. *J Am Acad Child Adolesc Psychiatry*  
45 2015;54(1):37-44 e2. doi: 10.1016/j.jaac.2014.10.010 [published Online First: 2014/12/20]  
46  
47 2. Park RJ, Goodyer IM. Clinical guidelines for depressive disorders in childhood and adolescence. *Eur Child*  
48 *Adolesc Psychiatry* 2000;9(3):147-61. [published Online First: 2000/11/30]  
49  
50 3. Cipriani A, Zhou X, Del Giovane C, et al. Comparative efficacy and tolerability of antidepressants for major  
51 depressive disorder in children and adolescents: a network meta-analysis. *Lancet*  
52 2016;388(10047):881-90. doi: 10.1016/S0140-6736(16)30385-3 [published Online First: 2016/06/13]  
53  
54  
55  
56  
57  
58  
59  
60

- 1  
2  
3 4. Eckshtain D, Kuppens S, Ugueto A, et al. Meta-Analysis: 13-Year Follow-up of Psychotherapy Effects on  
4 Youth Depression. *J Am Acad Child Adolesc Psychiatry* 2019 doi: 10.1016/j.jaac.2019.04.002  
5  
6 [published Online First: 2019/04/21]  
7
- 8  
9 5. Weisz JR, Kuppens S, Ng MY, et al. Are Psychotherapies for Young People Growing Stronger? Tracking  
10 Trends Over Time for Youth Anxiety, Depression, Attention-Deficit/Hyperactivity Disorder, and  
11 Conduct Problems. *Perspect Psychol Sci* 2019;14(2):216-37. doi: 10.1177/1745691618805436  
12  
13 [published Online First: 2018/12/21]  
14  
15
- 16 6. Gapstur SM, Drope JM, Jacobs EJ, et al. A blueprint for the primary prevention of cancer: Targeting  
17 established, modifiable risk factors. *CA Cancer J Clin* 2018;68(6):446-70. doi: 10.3322/caac.21496  
18  
19 [published Online First: 2018/10/12]  
20  
21
- 22 7. Cairns KE, Yap MB, Pilkington PD, et al. Risk and protective factors for depression that adolescents can  
23 modify: a systematic review and meta-analysis of longitudinal studies. *J Affect Disord* 2014;169:61-  
24 75. doi: 10.1016/j.jad.2014.08.006 [published Online First: 2014/08/27]  
25  
26  
27
- 28 8. Christensen H, Batterham PJ, Gosling JA, et al. Effectiveness of an online insomnia program (SHUTi) for  
29 prevention of depressive episodes (the GoodNight Study): a randomised controlled trial. *Lancet*  
30 *Psychiatry* 2016;3(4):333-41. doi: 10.1016/S2215-0366(15)00536-2 [published Online First:  
31  
32 2016/02/02]  
33  
34
- 35 9. Freeman D, Sheaves B, Goodwin GM, et al. The effects of improving sleep on mental health (OASIS): a  
36 randomised controlled trial with mediation analysis. *Lancet Psychiatry* 2017;4(10):749-58. doi:  
37  
38 10.1016/S2215-0366(17)30328-0 [published Online First: 2017/09/11]  
39  
40
- 41 10. Ye YY, Zhang YF, Chen J, et al. Internet-Based Cognitive Behavioral Therapy for Insomnia (ICBT-i)  
42 Improves Comorbid Anxiety and Depression-A Meta-Analysis of Randomized Controlled Trials.  
43 *PLoS One* 2015;10(11):e0142258. doi: 10.1371/journal.pone.0142258 [published Online First:  
44  
45 2015/11/19]  
46  
47  
48
- 49 11. Werner-Seidler A, Wong Q, Johnston L, et al. Pilot evaluation of the Sleep Ninja: a smartphone  
50 application for adolescent insomnia symptoms. *BMJ open* 2019;9(5):e026502. doi:  
51  
52 10.1136/bmjopen-2018-026502 [published Online First: 2019/05/28]  
53  
54
- 55 12. Waloszek JM, Schwartz O, Simmons JG, et al. The SENSE Study (Sleep and Education: learning New  
56 Skills Early): a community cognitive-behavioural therapy and mindfulness-based sleep intervention  
57 to prevent depression and improve cardiac health in adolescence. *BMC Psychol* 2015;3:39. doi:  
58  
59 10.1186/s40359-015-0096-x  
60



- 1  
2  
3 13. Blake M, Waloszek JM, Schwartz O, et al. The SENSE study: Post intervention effects of a randomized  
4 controlled trial of a cognitive-behavioral and mindfulness-based group sleep improvement  
5 intervention among at-risk adolescents. *J Consult Clin Psychol* 2016;84(12):1039-51. doi:  
6 10.1037/ccp0000142  
7  
8  
9
- 10  
11 14. Blake M, Schwartz O, Waloszek JM, et al. The SENSE Study: Treatment Mechanisms of a Cognitive  
12 Behavioral and Mindfulness-Based Group Sleep Improvement Intervention for At-Risk Adolescents.  
13 *Sleep* 2017;40(6) doi: 10.1093/sleep/zsx061  
14  
15
- 16  
17 15. Kirschbaum-Lesch I, Gest S, Legenbauer T, et al. Feasibility and Efficacy of Bright Light Therapy in  
18 Depressed Adolescent Inpatients. *Zeitschrift für Kinder- und Jugendpsychiatrie und Psychotherapie*  
19 2018;46(5):423-29. doi: 10.1024/1422-4917/a000603 [published Online First: 2018/07/18]  
20  
21
- 22  
23 16. de Bruin EJ, Bogels SM, Oort FJ, et al. Improvements of adolescent psychopathology after insomnia  
24 treatment: results from a randomized controlled trial over 1 year. *Journal of child psychology and*  
25 *psychiatry, and allied disciplines* 2018;59(5):509-22. doi: 10.1111/jcpp.12834 [published Online First:  
26 2017/10/21]  
27  
28  
29
- 30  
31 17. Dewald-Kaufmann JF, Oort FJ, Meijer AM. The effects of sleep extension and sleep hygiene advice on  
32 sleep and depressive symptoms in adolescents: a randomized controlled trial. *Journal of child*  
33 *psychology and psychiatry, and allied disciplines* 2014;55(3):273-83. doi: 10.1111/jcpp.12157  
34 [published Online First: 2013/11/21]  
35  
36
- 37  
38 18. Fang H, Tu S, Sheng J, et al. Depression in sleep disturbance: A review on a bidirectional relationship,  
39 mechanisms and treatment. *J Cell Mol Med* 2019;23(4):2324-32. doi: 10.1111/jcmm.14170  
40 [published Online First: 2019/02/09]  
41  
42
- 43  
44 19. Barclay NL, Gehrman PR, Gregory AM, et al. The heritability of insomnia progression during  
45 childhood/adolescence: results from a longitudinal twin study. *Sleep* 2015;38(1):109-18. doi:  
46 10.5665/sleep.4334 [published Online First: 2014/10/18]  
47  
48
- 49  
50 20. Cole MG, Dendukuri N. Risk factors for depression among elderly community subjects: a systematic  
51 review and meta-analysis. *Am J Psychiatry* 2003;160(6):1147-56. doi: 10.1176/appi.ajp.160.6.1147  
52 [published Online First: 2003/06/05]  
53  
54
- 55  
56 21. Baglioni C, Battagliese G, Feige B, et al. Insomnia as a predictor of depression: a meta-analytic  
57 evaluation of longitudinal epidemiological studies. *J Affect Disord* 2011;135(1-3):10-9. doi:  
58 10.1016/j.jad.2011.01.011 [published Online First: 2011/02/09]  
59  
60

- 1  
2  
3 22. Pigeon WR, Bishop TM, Krueger KM. Insomnia as a Precipitating Factor in New Onset Mental Illness: a  
4  
5 Systematic Review of Recent Findings. *Curr Psychiatry Rep* 2017;19(8):44. doi: 10.1007/s11920-  
6  
7 017-0802-x [published Online First: 2017/06/16]  
8  
9 23. Bao YP, Han Y, Ma J, et al. Cooccurrence and bidirectional prediction of sleep disturbances and  
10  
11 depression in older adults: Meta-analysis and systematic review. *Neurosci Biobehav Rev*  
12  
13 2017;75:257-73. doi: 10.1016/j.neubiorev.2017.01.032 [published Online First: 2017/02/10]  
14  
15 24. Hertenstein E, Feige B, Gmeiner T, et al. Insomnia as a predictor of mental disorders: A systematic  
16  
17 review and meta-analysis. *Sleep Med Rev* 2019;43:96-105. doi: 10.1016/j.smr.2018.10.006  
18  
19 [published Online First: 2018/12/12]  
20  
21 25. Li L, Wu C, Gan Y, et al. Insomnia and the risk of depression: a meta-analysis of prospective cohort  
22  
23 studies. *BMC Psychiatry* 2016;16(1):375. doi: 10.1186/s12888-016-1075-3 [published Online First:  
24  
25 2016/11/07]  
26  
27 26. Roberts RE, Roberts CR, Chen IG. Impact of insomnia on future functioning of adolescents. *J*  
28  
29 *Psychosom Res* 2002;53(1):561-9. [published Online First: 2002/07/20]  
30  
31 27. Roane BM, Taylor DJ. Adolescent insomnia as a risk factor for early adult depression and substance  
32  
33 abuse. *Sleep* 2008;31(10):1351-6. [published Online First: 2008/10/16]  
34  
35 28. Johnson EO, Chilcoat HD, Breslau N. Trouble sleeping and anxiety/depression in childhood. *Psychiatry*  
36  
37 *Res* 2000;94(2):93-102. [published Online First: 2000/05/16]  
38  
39 29. Alvaro PK, Roberts RM, Harris JK, et al. The direction of the relationship between symptoms of insomnia  
40  
41 and psychiatric disorders in adolescents. *J Affect Disord* 2017;207:167-74. doi:  
42  
43 10.1016/j.jad.2016.08.032 [published Online First: 2016/10/11]  
44  
45 30. Ritter PS, Hofler M, Wittchen HU, et al. Disturbed sleep as risk factor for the subsequent onset of bipolar  
46  
47 disorder--Data from a 10-year prospective-longitudinal study among adolescents and young adults. *J*  
48  
49 *Psychiatr Res* 2015;68:76-82. doi: 10.1016/j.jpsychires.2015.06.005 [published Online First:  
50  
51 2015/08/01]  
52  
53 31. Hayley AC, Skogen JC, Sivertsen B, et al. Symptoms of Depression and Difficulty Initiating Sleep from  
54  
55 Early Adolescence to Early Adulthood: A Longitudinal Study. *Sleep* 2015;38(10):1599-606. doi:  
56  
57 10.5665/sleep.5056 [published Online First: 2015/07/22]  
58  
59 32. Armstrong JM, Ruttle PL, Klein MH, et al. Associations of child insomnia, sleep movement, and their  
60  
persistence with mental health symptoms in childhood and adolescence. *Sleep* 2014;37(5):901-9.  
doi: 10.5665/sleep.3656 [published Online First: 2014/05/03]

1  
2  
3  
4  
5  
6  
7  
8  
9  
10  
11  
12  
13  
14  
15  
16  
17  
18  
19  
20  
21  
22  
23  
24  
25  
26  
27  
28  
29  
30  
31  
32  
33  
34  
35  
36  
37  
38  
39  
40  
41  
42  
43  
44  
45  
46  
47  
48  
49  
50  
51  
52  
53  
54  
55  
56  
57  
58  
59  
60

33. Armitage R, Hoffmann RF, Emslie GJ, et al. Sleep microarchitecture as a predictor of recurrence in children and adolescents with depression. *Int J Neuropsychopharmacol* 2002;5(3):217-28. doi: 10.1017/S1461145702002948 [published Online First: 2002/10/09]
34. Gregory AM, O'Connor TG. Sleep problems in childhood: a longitudinal study of developmental change and association with behavioral problems. *J Am Acad Child Adolesc Psychiatry* 2002;41(8):964-71. doi: 10.1097/00004583-200208000-00015 [published Online First: 2002/08/07]
35. Fredriksen K, Rhodes J, Reddy R, et al. Sleepless in Chicago: tracking the effects of adolescent sleep loss during the middle school years. *Child Dev* 2004;75(1):84-95. [published Online First: 2004/03/16]
36. Gregory AM, Caspi A, Eley TC, et al. Prospective longitudinal associations between persistent sleep problems in childhood and anxiety and depression disorders in adulthood. *J Abnorm Child Psychol* 2005;33(2):157-63. [published Online First: 2005/04/21]
37. Gregory AM, Van der Ende J, Willis TA, et al. Parent-reported sleep problems during development and self-reported anxiety/depression, attention problems, and aggressive behavior later in life. *Arch Pediatr Adolesc Med* 2008;162(4):330-5. doi: 10.1001/archpedi.162.4.330 [published Online First: 2008/04/09]
38. Gregory AM, Rijdsdijk FV, Lau JY, et al. The direction of longitudinal associations between sleep problems and depression symptoms: a study of twins aged 8 and 10 years. *Sleep* 2009;32(2):189-99. doi: 10.1093/sleep/32.2.189 [published Online First: 2009/02/26]
39. Touchette E, Chollet A, Galera C, et al. Prior sleep problems predict internalising problems later in life. *J Affect Disord* 2012;143(1-3):166-71. doi: 10.1016/j.jad.2012.05.049 [published Online First: 2012/08/04]
40. Greene G, Gregory AM, Fone D, et al. Childhood sleeping difficulties and depression in adulthood: the 1970 British Cohort Study. *J Sleep Res* 2015;24(1):19-23. doi: 10.1111/jsr.12200 [published Online First: 2014/09/03]
41. Wang B, Eastwood PR, Becker A, et al. Concurrent developmental course of sleep problems and emotional/behavioral problems in childhood and adolescence as reflected by the dysregulation profile. *Sleep* 2019;42(3) doi: 10.1093/sleep/zsy243 [published Online First: 2018/12/07]
42. Wang B, Isensee C, Becker A, et al. Developmental Trajectories of Sleep Problems from Childhood to Adolescence Both Predict and Are Predicted by Emotional and Behavioral Problems. *Front Psychol* 2016;7:1874. doi: 10.3389/fpsyg.2016.01874 [published Online First: 2016/12/19]

- 1  
2  
3 43. McCracken JT, Poland RE, Lutchmansingh P, et al. Sleep electroencephalographic abnormalities in  
4  
5 adolescent depressives: effects of scopolamine. *Biol Psychiatry* 1997;42(7):577-84. doi:  
6  
7 10.1016/S0006-3223(96)00431-3 [published Online First: 1997/10/06]  
8  
9 44. Rao U, McCracken JT, Lutchmansingh P, et al. Electroencephalographic sleep and urinary free cortisol  
10  
11 in adolescent depression: a preliminary report of changes from episode to recovery. *Biol Psychiatry*  
12  
13 1997;41(3):369-73. [published Online First: 1997/02/01]  
14  
15 45. Rao U, Dahl RE, Ryan ND, et al. The relationship between longitudinal clinical course and sleep and  
16  
17 cortisol changes in adolescent depression. *Biol Psychiatry* 1996;40(6):474-84. doi: 10.1016/0006-  
18  
19 3223(95)00481-5 [published Online First: 1996/09/15]  
20  
21 46. Rao U, Dahl RE, Ryan ND, et al. Heterogeneity in EEG sleep findings in adolescent depression: unipolar  
22  
23 versus bipolar clinical course. *J Affect Disord* 2002;70(3):273-80. [published Online First:  
24  
25 2002/07/20]  
26  
27 47. Rao U, Poland RE. Electroencephalographic sleep and hypothalamic-pituitary-adrenal changes from  
28  
29 episode to recovery in depressed adolescents. *J Child Adolesc Psychopharmacol* 2008;18(6):607-  
30  
31 13. doi: 10.1089/cap.2008.034 [published Online First: 2008/12/26]  
32  
33 48. Shain BN, Naylor M, Shipley JE, et al. Imipramine effects on sleep in depressed adolescents: a  
34  
35 preliminary report. *Biol Psychiatry* 1990;28(5):459-62. [published Online First: 1990/09/01]  
36  
37 49. Goetz RR, Wolk SI, Coplan JD, et al. Premorbid polysomnographic signs in depressed adolescents: a  
38  
39 reanalysis of EEG sleep after longitudinal follow-up in adulthood. *Biol Psychiatry* 2001;49(11):930-  
40  
41 42. [published Online First: 2001/05/30]  
42  
43 50. Lovato N, Gradisar M. A meta-analysis and model of the relationship between sleep and depression in  
44  
45 adolescents: recommendations for future research and clinical practice. *Sleep Med Rev*  
46  
47 2014;18(6):521-9. doi: 10.1016/j.smrv.2014.03.006 [published Online First: 2014/05/27]  
48  
49 51. Zisapel N. Paediatric use of melatonin: Letter to the Editor regarding the manuscript "Current role of  
50  
51 melatonin in pediatric neurology: Clinical recommendations" by Bruni et al. *Eur J Paediatr Neurol*.  
52  
53 2015 Mar;19(2):122-33. *Eur J Paediatr Neurol* 2017;21(2):418-19. doi: 10.1016/j.ejpn.2016.07.013  
54  
55 [published Online First: 2016/08/16]  
56  
57 52. Bruni O, Alonso-Alconada D, Besag F, et al. Current role of melatonin in pediatric neurology: clinical  
58  
59 recommendations. *Eur J Paediatr Neurol* 2015;19(2):122-33. doi: 10.1016/j.ejpn.2014.12.007  
60  
[published Online First: 2015/01/03]

1  
2  
3  
4  
5  
6  
7  
8  
9  
10  
11  
12  
13  
14  
15  
16  
17  
18  
19  
20  
21  
22  
23  
24  
25  
26  
27  
28  
29  
30  
31  
32  
33  
34  
35  
36  
37  
38  
39  
40  
41  
42  
43  
44  
45  
46  
47  
48  
49  
50  
51  
52  
53  
54  
55  
56  
57  
58  
59  
60

53. Ma ZR, Shi LJ, Deng MH. Efficacy of cognitive behavioral therapy in children and adolescents with insomnia: a systematic review and meta-analysis. *Braz J Med Biol Res* 2018;51(6):e7070. doi: 10.1590/1414-431x20187070 [published Online First: 2018/05/24]
54. Kalak N, Gerber M, Kirov R, et al. Daily morning running for 3 weeks improved sleep and psychological functioning in healthy adolescents compared with controls. *J Adolesc Health* 2012;51(6):615-22. doi: 10.1016/j.jadohealth.2012.02.020 [published Online First: 2012/11/24]
55. van Maanen A, Meijer AM, Smits MG, et al. Effects of Melatonin and Bright Light Treatment in Childhood Chronic Sleep Onset Insomnia With Late Melatonin Onset: A Randomized Controlled Study. *Sleep* 2017;40(2) doi: 10.1093/sleep/zsw038 [published Online First: 2017/04/02]
56. Meltzer LJ, Johnson C, Crosette J, et al. Prevalence of diagnosed sleep disorders in pediatric primary care practices. *Pediatrics* 2010;125(6):e1410-8. doi: 10.1542/peds.2009-2725 [published Online First: 2010/05/12]
57. Meltzer LJ, Plaufcan MR, Thomas JH, et al. Sleep problems and sleep disorders in pediatric primary care: treatment recommendations, persistence, and health care utilization. *J Clin Sleep Med* 2014;10(4):421-6. doi: 10.5664/jcsm.3620 [published Online First: 2014/04/16]
58. Moher D, Shamseer L, Clarke M, et al. Preferred reporting items for systematic review and meta-analysis protocols (PRISMA-P) 2015 statement. *Syst Rev* 2015;4:1. doi: 10.1186/2046-4053-4-1 [published Online First: 2015/01/03]
59. Stroup DF, Berlin JA, Morton SC, et al. Meta-analysis of observational studies in epidemiology: a proposal for reporting. Meta-analysis Of Observational Studies in Epidemiology (MOOSE) group. *JAMA* 2000;283(15):2008-12. doi: 10.1001/jama.283.15.2008 [published Online First: 2000/05/02]
60. Viswanathan M, Berkman ND. Development of the RTI item bank on risk of bias and precision of observational studies. *J Clin Epidemiol* 2012;65(2):163-78. doi: 10.1016/j.jclinepi.2011.05.008 [published Online First: 2011/10/01]
61. Higgins JP, Thompson SG. Quantifying heterogeneity in a meta-analysis. *Stat Med* 2002;21(11):1539-58. doi: 10.1002/sim.1186 [published Online First: 2002/07/12]
62. Patsopoulos NA, Evangelou E, Ioannidis JP. Sensitivity of between-study heterogeneity in meta-analysis: proposed metrics and empirical evaluation. *Int J Epidemiol* 2008;37(5):1148-57. doi: 10.1093/ije/dyn065 [published Online First: 2008/04/22]
63. Gregory AM, Sadeh A. Sleep, emotional and behavioral difficulties in children and adolescents. *Sleep Med Rev* 2012;16(2):129-36. doi: 10.1016/j.smr.2011.03.007 [published Online First: 2011/06/17]

- 1  
2  
3 64. Rao U, Chen LA. Characteristics, correlates, and outcomes of childhood and adolescent depressive  
4 disorders. *Dialogues Clin Neurosci* 2009;11(1):45-62. [published Online First: 2009/05/13]  
5  
6  
7 65. Galland BC, Taylor BJ, Elder DE, et al. Normal sleep patterns in infants and children: a systematic  
8 review of observational studies. *Sleep Med Rev* 2012;16(3):213-22. doi: 10.1016/j.smrv.2011.06.001  
9 [published Online First: 2011/07/26]  
10  
11  
12 66. Tarokh L, Saletin JM, Carskadon MA. Sleep in adolescence: Physiology, cognition and mental health.  
13 *Neurosci Biobehav Rev* 2016;70:182-88. doi: 10.1016/j.neubiorev.2016.08.008 [published Online  
14 First: 2016/10/22]  
15  
16  
17  
18 67. Jenni OG, Molinari L, Cafilisch JA, et al. Sleep duration from ages 1 to 10 years: variability and stability in  
19 comparison with growth. *Pediatrics* 2007;120(4):e769-76. doi: 10.1542/peds.2006-3300 [published  
20 Online First: 2007/10/03]  
21  
22  
23  
24 68. Iglowstein I, Jenni OG, Molinari L, et al. Sleep duration from infancy to adolescence: reference values  
25 and generational trends. *Pediatrics* 2003;111(2):302-7. doi: 10.1542/peds.111.2.302 [published  
26 Online First: 2003/02/04]  
27  
28  
29  
30 69. Hummer DL, Lee TM. Daily timing of the adolescent sleep phase: Insights from a cross-species  
31 comparison. *Neurosci Biobehav Rev* 2016;70:171-81. doi: 10.1016/j.neubiorev.2016.07.023  
32 [published Online First: 2016/10/22]  
33  
34  
35  
36 70. Matricciani L, Olds T, Petkov J. In search of lost sleep: secular trends in the sleep time of school-aged  
37 children and adolescents. *Sleep Med Rev* 2012;16(3):203-11. doi: 10.1016/j.smrv.2011.03.005  
38 [published Online First: 2011/05/27]  
39  
40  
41  
42 71. Keyes KM, Maslowsky J, Hamilton A, et al. The great sleep recession: changes in sleep duration among  
43 US adolescents, 1991-2012. *Pediatrics* 2015;135(3):460-8. doi: 10.1542/peds.2014-2707 [published  
44 Online First: 2015/02/18]  
45  
46  
47  
48 72. Adolescent Sleep Working G, Committee on A, Council on School H. School start times for adolescents.  
49 *Pediatrics* 2014;134(3):642-9. doi: 10.1542/peds.2014-1697 [published Online First: 2014/08/27]  
50  
51  
52  
53 73. Stiglic N, Viner RM. Effects of screentime on the health and well-being of children and adolescents: a  
54 systematic review of reviews. *BMJ open* 2019;9(1):e023191. doi: 10.1136/bmjopen-2018-023191  
55 [published Online First: 2019/01/05]  
56  
57  
58  
59  
60

# Reporting checklist for protocol of a systematic review.

Based on the PRISMA-P guidelines.

## Instructions to authors

Complete this checklist by entering the page numbers from your manuscript where readers will find each of the items listed below.

Your article may not currently address all the items on the checklist. Please modify your text to include the missing information. If you are certain that an item does not apply, please write "n/a" and provide a short explanation.

Upload your completed checklist as an extra file when you submit to a journal.

In your methods section, say that you used the PRISMA-Reporting guidelines, and cite them as:

Moher D, Shamseer L, Clarke M, Ghersi D, Liberati A, Petticrew M, Shekelle P, Stewart LA. Preferred Reporting Items for Systematic Review and Meta-Analysis Protocols (PRISMA-P) 2015 statement. *Syst Rev.* 2015;4(1):1.

| Reporting Item      |                     |                                                                                                                                           | Page Number |
|---------------------|---------------------|-------------------------------------------------------------------------------------------------------------------------------------------|-------------|
| <b>Title</b>        |                     |                                                                                                                                           |             |
| Identification      | <a href="#">#1a</a> | Identify the report as a protocol of a systematic review                                                                                  | 1           |
| Update              | <a href="#">#1b</a> | If the protocol is for an update of a previous systematic review, identify as such                                                        | n/a         |
| <b>Registration</b> |                     |                                                                                                                                           |             |
|                     | <a href="#">#2</a>  | If registered, provide the name of the registry (such as PROSPERO) and registration number                                                | 2           |
| <b>Authors</b>      |                     |                                                                                                                                           |             |
| Contact             | <a href="#">#3a</a> | Provide name, institutional affiliation, e-mail address of all protocol authors; provide physical mailing address of corresponding author | 1           |
| Contribution        | <a href="#">#3b</a> | Describe contributions of protocol authors and identify the guarantor of the review                                                       | 12          |
| <b>Amendments</b>   |                     |                                                                                                                                           |             |

|    |                      |                                                                                               |     |
|----|----------------------|-----------------------------------------------------------------------------------------------|-----|
| 1  | <a href="#">#4</a>   | If the protocol represents an amendment of a previously completed or                          | n/a |
| 2  |                      | published protocol, identify as such and list changes; otherwise, state                       |     |
| 3  |                      | plan for documenting important protocol amendments                                            |     |
| 4  |                      |                                                                                               |     |
| 5  |                      |                                                                                               |     |
| 6  | <b>Support</b>       |                                                                                               |     |
| 7  |                      |                                                                                               |     |
| 8  | Sources              | <a href="#">#5a</a> Indicate sources of financial or other support for the review             | 12  |
| 9  |                      |                                                                                               |     |
| 10 | Sponsor              | <a href="#">#5b</a> Provide name for the review funder and / or sponsor                       | n/a |
| 11 |                      |                                                                                               |     |
| 12 | Role of sponsor or   | <a href="#">#5c</a> Describe roles of funder(s), sponsor(s), and / or institution(s), if any, | 12  |
| 13 | funder               | in developing the protocol                                                                    |     |
| 14 |                      |                                                                                               |     |
| 15 |                      |                                                                                               |     |
| 16 | <b>Introduction</b>  |                                                                                               |     |
| 17 |                      |                                                                                               |     |
| 18 | Rationale            | <a href="#">#6</a> Describe the rationale for the review in the context of what is already    | 3-5 |
| 19 |                      | known                                                                                         |     |
| 20 | Objectives           | <a href="#">#7</a> Provide an explicit statement of the question(s) the review will           | 6   |
| 21 |                      | address with reference to participants, interventions, comparators, and                       |     |
| 22 |                      | outcomes (PICO)                                                                               |     |
| 23 |                      |                                                                                               |     |
| 24 |                      |                                                                                               |     |
| 25 |                      |                                                                                               |     |
| 26 |                      |                                                                                               |     |
| 27 |                      |                                                                                               |     |
| 28 | <b>Methods</b>       |                                                                                               |     |
| 29 |                      |                                                                                               |     |
| 30 | Eligibility criteria | <a href="#">#8</a> Specify the study characteristics (such as PICO, study design, setting,    | 6-7 |
| 31 |                      | time frame) and report characteristics (such as years considered,                             |     |
| 32 |                      | language, publication status) to be used as criteria for eligibility for                      |     |
| 33 |                      | the review                                                                                    |     |
| 34 |                      |                                                                                               |     |
| 35 |                      |                                                                                               |     |
| 36 |                      |                                                                                               |     |
| 37 | Information sources  | <a href="#">#9</a> Describe all intended information sources (such as electronic              | 8   |
| 38 |                      | databases, contact with study authors, trial registers or other grey                          |     |
| 39 |                      | literature sources) with planned dates of coverage                                            |     |
| 40 |                      |                                                                                               |     |
| 41 |                      |                                                                                               |     |
| 42 |                      |                                                                                               |     |
| 43 | Search strategy      | <a href="#">#10</a> Present draft of search strategy to be used for at least one electronic   | 8   |
| 44 |                      | database, including planned limits, such that it could be repeated                            |     |
| 45 |                      |                                                                                               |     |
| 46 |                      |                                                                                               |     |
| 47 | Study records - data | <a href="#">#11a</a> Describe the mechanism(s) that will be used to manage records and        | 9   |
| 48 | management           | data throughout the review                                                                    |     |
| 49 |                      |                                                                                               |     |
| 50 | Study records -      | <a href="#">#11b</a> State the process that will be used for selecting studies (such as two   | 9   |
| 51 | selection process    | independent reviewers) through each phase of the review (that is,                             |     |
| 52 |                      | screening, eligibility and inclusion in meta-analysis)                                        |     |
| 53 |                      |                                                                                               |     |
| 54 |                      |                                                                                               |     |
| 55 |                      |                                                                                               |     |
| 56 | Study records - data | <a href="#">#11c</a> Describe planned method of extracting data from reports (such as         | 10  |
| 57 | collection process   | piloting forms, done independently, in duplicate), any processes for                          |     |
| 58 |                      |                                                                                               |     |
| 59 |                      |                                                                                               |     |
| 60 |                      |                                                                                               |     |



|    |                    |                                                                                           |       |
|----|--------------------|-------------------------------------------------------------------------------------------|-------|
|    |                    | obtaining and confirming data from investigators                                          |       |
| 1  |                    |                                                                                           |       |
| 2  |                    |                                                                                           |       |
| 3  | Data items         | <a href="#">#12</a> List and define all variables for which data will be sought (such as  | 10    |
| 4  |                    | PICO items, funding sources), any pre-planned data assumptions and                        |       |
| 5  |                    | simplifications                                                                           |       |
| 6  |                    |                                                                                           |       |
| 7  |                    |                                                                                           |       |
| 8  | Outcomes and       | <a href="#">#13</a> List and define all outcomes for which data will be sought, including | 9-10  |
| 9  | prioritization     | prioritization of main and additional outcomes, with rationale                            |       |
| 10 |                    |                                                                                           |       |
| 11 |                    |                                                                                           |       |
| 12 | Risk of bias in    | <a href="#">#14</a> Describe anticipated methods for assessing risk of bias of individual | 10    |
| 13 | individual studies | studies, including whether this will be done at the outcome or study                      |       |
| 14 |                    | level, or both; state how this information will be used in data synthesis                 |       |
| 15 |                    |                                                                                           |       |
| 16 |                    |                                                                                           |       |
| 17 | Data synthesis     | <a href="#">#15a</a> Describe criteria under which study data will be quantitatively      | 10-11 |
| 18 |                    | synthesised                                                                               |       |
| 19 |                    |                                                                                           |       |
| 20 |                    |                                                                                           |       |
| 21 | Data synthesis     | <a href="#">#15b</a> If data are appropriate for quantitative synthesis, describe planned | 10-11 |
| 22 |                    | summary measures, methods of handling data and methods of                                 |       |
| 23 |                    | combining data from studies, including any planned exploration of                         |       |
| 24 |                    | consistency (such as I <sup>2</sup> , Kendall's $\tau$ )                                  |       |
| 25 |                    |                                                                                           |       |
| 26 |                    |                                                                                           |       |
| 27 |                    |                                                                                           |       |
| 28 | Data synthesis     | <a href="#">#15c</a> Describe any proposed additional analyses (such as sensitivity or    | 10-11 |
| 29 |                    | subgroup analyses, meta-regression)                                                       |       |
| 30 |                    |                                                                                           |       |
| 31 | Data synthesis     | <a href="#">#15d</a> If quantitative synthesis is not appropriate, describe the type of   | 10-11 |
| 32 |                    | summary planned                                                                           |       |
| 33 |                    |                                                                                           |       |
| 34 |                    |                                                                                           |       |
| 35 | Meta-bias(es)      | <a href="#">#16</a> Specify any planned assessment of meta-bias(es) (such as publication  | 10-11 |
| 36 |                    | bias across studies, selective reporting within studies)                                  |       |
| 37 |                    |                                                                                           |       |
| 38 |                    |                                                                                           |       |
| 39 | Confidence in      | <a href="#">#17</a> Describe how the strength of the body of evidence will be assessed    | 11    |
| 40 | cumulative         | (such as GRADE)                                                                           |       |
| 41 | evidence           |                                                                                           |       |
| 42 |                    |                                                                                           |       |
| 43 |                    |                                                                                           |       |

The PRISMA-P checklist is distributed under the terms of the Creative Commons Attribution License CC-BY 4.0. This checklist was completed on 26. September 2019 using <https://www.goodreports.org/>, a tool made by the [EQUATOR Network](#) in collaboration with [Penelope.ai](#)

# BMJ Open

**Do insomnia and/or sleep disturbances predict the onset, relapse or worsening of depression in community and clinical samples of children and youth? Protocol for a systematic review and meta-analysis.**

|                                 |                                                                                                                                                                                                                                                                                                                                                                                                                                                                    |
|---------------------------------|--------------------------------------------------------------------------------------------------------------------------------------------------------------------------------------------------------------------------------------------------------------------------------------------------------------------------------------------------------------------------------------------------------------------------------------------------------------------|
| Journal:                        | <i>BMJ Open</i>                                                                                                                                                                                                                                                                                                                                                                                                                                                    |
| Manuscript ID                   | bmjopen-2019-034606.R1                                                                                                                                                                                                                                                                                                                                                                                                                                             |
| Article Type:                   | Protocol                                                                                                                                                                                                                                                                                                                                                                                                                                                           |
| Date Submitted by the Author:   | 15-May-2020                                                                                                                                                                                                                                                                                                                                                                                                                                                        |
| Complete List of Authors:       | marino, cecilia; Centre for Addiction and Mental Health, Andrade, Brendan; University of Toronto Department of Psychiatry, Aitken, Madison; Centre for Addiction and Mental Health Bonato, Sarah; Centre for Addiction and Mental Health Centre for Addiction and Mental Health, Library Services Haltigan, John; Centre for Addiction and Mental Health Wang, Wei; Centre for Addiction and Mental Health Szatmari, Peter; Centre for Addiction and Mental Health |
| <b>Primary Subject Heading</b>: | Mental health                                                                                                                                                                                                                                                                                                                                                                                                                                                      |
| Secondary Subject Heading:      | Mental health                                                                                                                                                                                                                                                                                                                                                                                                                                                      |
| Keywords:                       | SLEEP MEDICINE, Depression & mood disorders < PSYCHIATRY, Child & adolescent psychiatry < PSYCHIATRY, longitudinal studies, systematic review                                                                                                                                                                                                                                                                                                                      |
|                                 |                                                                                                                                                                                                                                                                                                                                                                                                                                                                    |

SCHOLARONE™  
Manuscripts



I, the Submitting Author has the right to grant and does grant on behalf of all authors of the Work (as defined in the below author licence), an exclusive licence and/or a non-exclusive licence for contributions from authors who are: i) UK Crown employees; ii) where BMJ has agreed a CC-BY licence shall apply, and/or iii) in accordance with the terms applicable for US Federal Government officers or employees acting as part of their official duties; on a worldwide, perpetual, irrevocable, royalty-free basis to BMJ Publishing Group Ltd ("BMJ") its licensees and where the relevant Journal is co-owned by BMJ to the co-owners of the Journal, to publish the Work in this journal and any other BMJ products and to exploit all rights, as set out in our [licence](#).

The Submitting Author accepts and understands that any supply made under these terms is made by BMJ to the Submitting Author unless you are acting as an employee on behalf of your employer or a postgraduate student of an affiliated institution which is paying any applicable article publishing charge ("APC") for Open Access articles. Where the Submitting Author wishes to make the Work available on an Open Access basis (and intends to pay the relevant APC), the terms of reuse of such Open Access shall be governed by a Creative Commons licence – details of these licences and which [Creative Commons](#) licence will apply to this Work are set out in our licence referred to above.

Other than as permitted in any relevant BMJ Author's Self Archiving Policies, I confirm this Work has not been accepted for publication elsewhere, is not being considered for publication elsewhere and does not duplicate material already published. I confirm all authors consent to publication of this Work and authorise the granting of this licence.

1  
2  
3 Do insomnia and/or sleep disturbances predict the onset, relapse or worsening of depression in community  
4 and clinical samples of children and youth? Protocol for a systematic review and meta-analysis.  
5  
6  
7

8  
9 Cecilia Marino<sup>1,2</sup>, Brendan Andrade<sup>1,2</sup>, Madison Aitken,<sup>1,2</sup> Sarah Bonato<sup>1</sup>, John Haltigan<sup>1,2</sup>, Wei Wang<sup>1,2</sup> and  
10 Peter Szatmari<sup>1,2,3</sup>

11  
12 <sup>1</sup> Cundill Centre for Child and Youth Depression, Center for Addiction and Mental Health, Toronto, Canada

13  
14 <sup>2</sup> Department of Psychiatry, University of Toronto, Toronto, Canada

15  
16 <sup>3</sup> Hospital for Sick Children, Toronto, Ontario, Canada

17  
18 Corresponding author: Cecilia Marino, Centre for Addiction and Mental Health (CAMH), 80 Workman Way,  
19 Room 1236, Toronto, ON M6J 1H4, e-mail: [cecilia.marino@utoronto.ca](mailto:cecilia.marino@utoronto.ca), Tel: 416-535-8501 Ext. 35134

20  
21  
22 Brendan Andrade, [Brendan.Andrade@camh.ca](mailto:Brendan.Andrade@camh.ca)

23  
24 Madison Aitken, [Madison.Aitken@camh.ca](mailto:Madison.Aitken@camh.ca)

25  
26 Sarah Bonato, [Sarah.Bonato@camh.ca](mailto:Sarah.Bonato@camh.ca)

27  
28 John Haltigan, [John.Haltigan@camh.ca](mailto:John.Haltigan@camh.ca)

29  
30 Wei Wang, [Wei.Wang@camh.ca](mailto:Wei.Wang@camh.ca)

31  
32 Peter Szatmari, [peter.szatmari@utoronto.ca](mailto:peter.szatmari@utoronto.ca)  
33  
34  
35  
36  
37  
38

### 39 Abstract

#### 40 Introduction

41  
42 Disturbed sleep represents a potentially important modifiable risk factor for the development of depression  
43 in children and youth. This protocol for a systematic review proposes to investigate whether insomnia  
44 and/or sleep disturbances predict child and youth depression in community and clinical-based samples.  
45  
46  
47  
48

#### 49 Methods and analysis

50  
51 The protocol adheres to the Preferred Reporting Items for Systematic Review and Meta-Analysis protocols  
52 (PRISMA-P) guidelines. English-written, longitudinal studies that quantitatively estimated the prediction of  
53 depression by insomnia and/or sleep disturbances in individuals 5-24 years of age will be included.  
54  
55 EMBASE, MEDLINE, PsychINFO, Scopus and Web of Science and grey literature will be searched from  
56 1980 to the present. For the selection of studies, two reviewers will be involved. Data extraction will be  
57  
58 conducted by one author and checked independently by a second author. Risk of bias will be appraised  
59  
60

1  
2  
3 using the Research Triangle Institute Item Bank (RTI-IB) tool. Heterogeneity will be measured using the  $I^2$   
4  
5 statistic. Meta-analysis will be carried out if  $\geq 3$  results are available and if outcome measures can be  
6  
7 pooled. The choice between a random-effect or fixed-effect model will be based both on the  $I^2$  statistics and  
8  
9 the participant-level characteristics of the combined studies. Results of the meta-analyses will be  
10  
11 summarized by a forest plot. Analyses will be performed in subgroups stratified by key variables defined  
12  
13 depending on the amount and type of information retrieved.

14  
15 A narrative synthesis will be conducted in place of the meta-analysis, should pooling of data not be  
16  
17 possible. Quality of evidence will be rated using the Grading of Recommendations Assessment,  
18  
19 Development, and Evaluation (GRADE) guidelines.

20  
21 As this is a protocol for systematic review and meta-analysis of published data, ethics review and approval  
22  
23 are not required. The findings will be published in a peer-reviewed journal and disseminated at scientific  
24  
25 conferences and to patient advocacy organizations.

#### 26 27 28 29 30 Strengths and limitations of this study

- 31  
32 • This is a protocol for a systematic review and meta-analysis of existing prospective, longitudinal  
33  
34 evidence on insomnia and/or sleep disturbances predicting depression in children and youth.
  - 35  
36 • This protocol will adhere to the Preferred Reporting Items for Systematic review and Meta-Analysis  
37  
38 protocols (PRISMA-P) guidelines
  - 39  
40 • This protocol is registered at PROSPERO, the international prospective register of systematic  
41  
42 reviews
  - 43  
44 • Full-text screening and extraction will be performed by two reviewers. Any uncertainty regarding  
45  
46 selection will be resolved by consensus and if necessary, by a third reviewer.
  - 47  
48 • With regards to limitations, the review will not include treatment studies and will include only  
49  
50 English-written articles. We include individuals aged 5-24 years, therefore excluding studies on  
51  
52 child and youth disturbed sleep predicting depression at later stages of life.
- 53  
54  
55  
56  
57  
58

59 Trial registration number: International Prospective Register for Systematic Reviews (PROSPERO)  
60 registration number CRD42019136729.

## Introduction

A recent epidemiological study analyzing data from the 2016 National Survey of Children's Health reports prevalence estimates of depression of 1.7% and 6.1% in 6-11 and 12-17 years age-ranges, respectively.<sup>1</sup>

The incidence of depression peaks at 20 years of age<sup>2</sup> with disrupting effects on normative developmental trajectories. Prevalence is equal for both sexes prior to puberty, then it is higher in females.<sup>3</sup> Treatment shows limited efficacy,<sup>4-6</sup> suggesting that prevention may be a more effective resource to reduce the incidence of depression.

Targeting modifiable risk factors of illnesses is becoming a relevant therapeutic strategy for disease prevention.<sup>7</sup> Among modifiable risk factors predicting child and youth depression, insomnia is increasingly recognized as an important component of the complex and multi-factorial causal pathway of depression.<sup>8</sup> Treating insomnia to specifically reduce the incidence and/or severity of depression has been the focus of controlled, high quality, randomized treatment studies in depressed or at risk for depression adult or elderly individuals.<sup>9-10</sup> In a recent meta-analysis, internet-based cognitive behavioural therapy (CBT) for insomnia had a significant, small effect on comorbid depression in individuals older than 18 years.<sup>11</sup>

Similar evidence in younger individuals is scarce, mostly consists of studies with small sample size/no follow-up, and it is limited to individuals older than 12 years of age<sup>12-18</sup>.

In a randomized controlled trial, CBT for insomnia for six weekly sessions and a booster session after 2 months was significantly more effective in decreasing comorbid depression compared to waitlist in 12-19-year-old individuals with DSM-5 insomnia and no comorbid psychiatric disorders. The effect was large, was maintained after 12 months, and was fully mediated by the reduction of insomnia symptoms.<sup>17</sup>

In a longitudinal, randomised controlled trial study (SENSE, i.e. Sleep and Education: learning New Skills Early) the preventative effect on the incidence of depression in at risk for depression, 12-17-year-old adolescents with sleeping difficulties is investigated.<sup>13</sup> The interventions consist of seven weekly sessions of either a CBT/mindfulness-based sleep intervention or an active control intervention, followed by two booster sessions after three and six months post-intervention. One-hundred-twenty-three participants have completed the interventions,<sup>14-15</sup> however findings regarding the main outcomes of the study (preventative effects of depression) from the two-year follow-up are not available yet.

It is currently not known whether treating sleep problems in depressed or at risk for depression children (e.g. children with history of abuse, with high emotional dysregulation, offspring of depressed parents)

1  
2  
3 would lead to a reduction or lower incidence of depression, respectively, than it would be if sleep problems  
4 were not treated.<sup>19</sup> To understand whether earlier prevention efforts could be more effective, a precise  
5 quantitative estimate of the prediction of depression by insomnia in the entire developmental population,  
6 including depressed and non-depressed individuals, is needed.  
7  
8  
9

10  
11 Insomnia consists of clinically significant long sleep-onset latency and/or awakening after sleep onset  
12 and/or early-morning awakening, accompanied by diurnal tiredness and functional impairment. Prevalence  
13 of insomnia is 19.5% in children, equally distributed among boys and girls; in youth, prevalence is 17.4%,  
14 and higher among girls.<sup>20</sup>  
15  
16  
17

18  
19 Six systematic reviews have summarized cohort studies on insomnia predicting depression.<sup>21-25</sup> Pooled  
20 estimates are consistent across reviews ranging 2.10 (95% CI= 1.86-2.38)<sup>26</sup>-2.83 (95% CI= 1.55-5.17)<sup>24</sup>,  
21 and across subgroups stratified by the most common confounders, e.g. sex [male: 1.46 (95% CI= 1.13-  
22 1.88)<sup>25</sup>; females: 1.96 (95% CI= 1.05-3.66)<sup>25</sup>], type of ascertainment [non-general population: 2.05 (95%  
23 CI= 1.53-2.74)<sup>25</sup>; general population: 2.34 (95% CI= 1.85-2.96)<sup>25</sup>], and age [individuals of age  $\geq$  60 years:  
24 1.87 (95% CI= 1.47, 2.37)<sup>25</sup>-1.92 (95% CI: 1.61-2.30)<sup>23</sup>; individuals younger than 60 years of age: 2.50  
25 (95% CI= 1.96, 3.20)<sup>25</sup>].  
26  
27  
28  
29  
30  
31

32  
33 However, only three of the six systematic reviews included participants younger than 18 years,<sup>22 25 26</sup> and a  
34 pooled estimate, i.e. odds ratio= 2.0 (95% CI= 1.5-2.7), was provided by only one of the three reviews.<sup>26</sup>  
35

36  
37 This estimate was based on three studies up to 2010 and included 7404 participants, whose age ranged  
38 between 6 and 16 years.<sup>27-29</sup> In all three studies, depression was defined according to DSM IV, and  
39 insomnia to DSM-IV-TR criteria. The test for heterogeneity for this group did not show a significant index  
40 (Q-value= 0.3; df(Q)=2; p=0.9; and I<sup>2</sup>=0.0). Li et al.<sup>25</sup> updated and used the same selection criteria of  
41 Baglioni et al.<sup>26</sup> and although fifteen new cohort studies were added, no new studies on children and youth  
42 were included. Finally, Pigeon et al.<sup>22</sup> summarized studies published from 2014 to 2017; four studies on  
43 children and youth were included, of which three supported insomnia predicting depression,<sup>30-32</sup> and one  
44 found no such association.<sup>33</sup> All three systematic reviews of this age group excluded studies which did not  
45 control for baseline depression. This led to a greatly reduced number of studies. While the rationale of this  
46 choice is clear for studies of risk and prediction, it might not have been the ideal choice, due to the overall  
47 paucity of studies in the child and youth age-range compared to other age groups. Including studies that did  
48 not control for baseline depression would allow testing of whether there are significant differences in the  
49 meta-analytic estimates between studies controlling versus not-controlling for this variable. If no differences  
50  
51  
52  
53  
54  
55  
56  
57  
58  
59  
60

1  
2  
3 are found, studies not controlling for baseline depression could contribute to the pooled data with an overall  
4 increase of the precision for the estimate of the meta-analytic effects.  
5

6  
7 There is also some evidence available on whether sleep disturbances other than insomnia predicts child  
8 and youth depression.<sup>34-43</sup> This may include increased/short/disrupted sleep duration with/without diurnal  
9 sleepiness, sleepwalking/talking, nightmares, bedwetting, breathing-related sleep disorders, and/or  
10 circadian disturbances. Furthermore, sleep disturbances more broadly defined may include challenges  
11 either generically defined with regards to duration and consistency over time, measured by self-reported  
12 questionnaires, interview or by EEG/actigraph-based measures, and scored by either single-item or  
13 cumulative scores. A recent meta-analysis summarized studies testing the association of broadly defined  
14 sleep disturbances on depression in 12-20-year-old already clinically depressed participants. In all selected  
15 studies,<sup>44-50</sup> sleep was defined by EEG-based, objective measures. Estimates of the meta-analytic effects  
16 identified that EEG-based longer sleep onset latency, more wake after sleep onset and lower sleep efficiency  
17 were significant predictors of depression compared to typical sleep (effect sizes ranging .43-.58).<sup>51</sup>  
18

19  
20 Although findings from this review are of crucial importance for potential secondary prevention programs in  
21 depressed youth, it would be useful to have summarized data on the longitudinal association of broadly  
22 defined sleep disturbances with depression on the entire developmental population, including non-clinical  
23 individuals as well as a broader age range, which would allow to apply findings to primary prevention and/or  
24 early intervention programs.  
25

26  
27 Finally, insomnia and/or sleep disturbances are often associated to comorbid psychiatric and medical  
28 conditions.<sup>19</sup> Most previous knowledge synthesis studies have excluded comorbidities, limiting the  
29 generalizability and transferability of findings. For this reason, in this systematic review studies focusing on  
30 both primary and comorbid insomnia and/or sleep disturbances will be included. To understand the extent  
31 to which insomnia and/or sleep disturbances have a distinct risk to depression across comorbid disorders,  
32 subgroup analyses will be performed.  
33

34  
35 Understanding whether insomnia and/or sleep disturbances significantly increase the risk of depression in  
36 children and youth could lead to variation in clinical practice and inform policy development. Preventive  
37 strategies could include treating sleep problems starting as early as childhood. This is particularly important  
38 in light of evidence on the differential effectiveness of a number of treatment for sleep problems (e.g.  
39 melatonin,<sup>52 53</sup> cognitive behavioural therapy,<sup>54</sup> physical exercise,<sup>55</sup> and bright light therapy<sup>56</sup>) and the fact  
40 that sleep problems in children are under-diagnosed<sup>57</sup> and rarely treated.<sup>58</sup>  
41  
42  
43  
44  
45  
46  
47  
48  
49  
50  
51  
52  
53  
54  
55  
56  
57  
58  
59  
60



1  
2  
3 The purpose of this protocol is to outline methods for a systematic review and meta-analysis of data from  
4 prospective, longitudinal studies of children and youth ascertained from clinical or community-based  
5 samples investigating the role of insomnia and/or sleep disturbances compared to typical sleep as  
6 predictors of depression. “Do children and youth with insomnia and/or sleep disturbance have higher rates  
7 of later depression than children and youth without insomnia and/or sleep disturbance”?  
8  
9  
10  
11

12 We are interested in testing this relationship in the context of both the absence and presence of baseline  
13 depression, i.e. whether insomnia and/or sleep disturbance predict both new and relapse/worsening of  
14 depression, respectively.  
15  
16  
17

18 Our study will add to the currently available knowledge synthesis in that:  
19

- 20 1. It will provide an updated meta-analytic estimate of the effects of insomnia predicting child and  
21 youth depression, adding studies from 2010 onward compared to Baglioni et al.<sup>26</sup>  
22  
23
- 24 2. By including studies on 5-24-year-old participants from both clinical and non-clinical populations, it  
25 will provide a more comprehensive and updated meta-analytic estimate compared to Lovato and  
26 Gradisar<sup>51</sup>  
27  
28
- 29 3. It will include studies on participants with/without baseline depression and whether or not controlling  
30 for baseline depression  
31  
32
- 33 4. It will include studies of both primary and comorbid insomnia and/or sleep disturbances  
34  
35

36 As a secondary aim, we will test whether insomnia and/or sleep disturbance predict new onset and/or  
37 worsening/relapse of depression, by testing the pooled estimate in two subgroups of studies, respectively,  
38 those including participants with baseline depression or where baseline depression has been controlled for,  
39 and studies including participants without baseline depression or where baseline depression has not been  
40 controlled for.  
41  
42  
43  
44

45 Finally, we aim to explore the sources of potential heterogeneity and examine the robustness of the primary  
46 hypothesis against key confounding variables. Specifically, we will address whether the prediction of child  
47 and youth depression by insomnia and/or sleep disturbances significantly differ between studies stratified by  
48 key variables, e.g. risk of bias score, type of ascertainment, type of sleep disturbance, measurement of  
49 outcome, presence of baseline comorbidity, sample size, age group, gender. Subgroups will be defined  
50 depending on the amount and type of information retrieved.  
51  
52  
53  
54  
55

56 **Methods**  
57  
58  
59  
60

1  
2  
3 For the protocol, we will follow the guidelines outlined in “Preferred Reporting Items for Systematic review  
4 and Meta-Analysis protocols (PRISMA-P)”.<sup>59</sup> For the final report we will follow the guidelines set in “Meta-  
5 analysis Of Observational Studies in Epidemiology: a proposal for reporting” (MOOSE).<sup>60</sup>  
6  
7  
8  
9

## 10 Inclusion criteria

### 14 *Study types*

16 This study will include (1) English-written, (2) prospective, longitudinal observational studies that  
17 quantitatively estimated the prediction of depression by insomnia and/or sleep disturbances in children and  
18 youth. Only those studies reporting odds ratio, relative risk, hazard ratio, regression coefficients or  
19 correlation coefficients with their respective measurements of error and p-values will be selected. Grey  
20 literature including relevant dissertations/PhD theses and key conference publications will be included. Case  
21 series, case reports, systematic reviews, meta-analyses, as well as experimental, retrospective, cross-  
22 sectional, treatment, theoretical and position studies will be excluded.  
23  
24  
25  
26  
27  
28  
29  
30

### 31 *Population type*

33 Mean age to determine eligibility for inclusion of the study is between 5-24 years. This age range was  
34 chosen to cover the whole age range of risk for depression in childhood and youth, and to include the period  
35 of peak incidence for depression.<sup>1 2</sup> In our review, we identify three categories: ‘childhood’ between 5 and 9  
36 years of age, ‘adolescence’ between 10 and 19 years of age, and ‘young adulthood’ between 20 and 24  
37 years of age.<sup>61</sup> For simplicity, the term ‘youth’ refers to individuals whose age is between 10 and 24 years.  
38  
39  
40  
41  
42  
43 Studies focusing on participants belonging to either community or clinical based samples with any comorbid  
44 psychiatric/neurological/medical diagnosis will be included.  
45  
46  
47  
48

### 49 *Exposure*

51 Studies will be included if focusing on either one of the following two exposures:

- 53 1. Insomnia, defined as clinically significant difficulty in initiating or maintaining sleep or non-restorative  
54 sleep, as based on DSM III and later versions. Although the criterion of daytime impairment is  
55 required to define clinically significant insomnia, it has been shown that pooled estimates of  
56 insomnia predicting depression when this criterion is taken into account<sup>24</sup> is of comparable  
57 magnitude relative to the ones obtained when this criterion is not considered (Baglioni et al. 2011;  
58  
59  
60

1  
2  
3 Li et al. 2016).<sup>26</sup> Therefore, to allow for inclusion of the highest number of studies, daytime  
4 impairment will be free to vary.  
5

- 6  
7 2. Sleep disturbances, defined as patterns of quality and sleep duration which deviate from expected  
8 age-related norms, i.e. increased/short/fragmented sleep duration with or without daytime  
9 fatigue/sleepiness, nightmares/terror attacks, circadian disturbances, and/or night walking/talking.  
10 Sleep disturbances can be generically defined with regards to duration and consistency over time,  
11 and can be based on subjective and/or EEG/actigraph-based, objective measures. Measures can  
12 be based on single or multiple items, or a cumulative score of various items. To increase the  
13 generalizability of the results, narcolepsy, breathing-related sleep disorders, central sleep apnea,  
14 non-rapid/rapid eye movement sleep disorder, restless legs syndrome, substance/medication-  
15 induced sleep disorder, and enuresis nocturna primaria may also be included.  
16  
17  
18  
19  
20  
21  
22  
23

24 Exposures' assessment can be administered by a clinician, a researcher, or based on self-report, parent-  
25 report, and/or teacher-report questionnaires.  
26  
27  
28  
29

### 30 *Outcome*

31 Studies will be included if they focus on either one of the following outcomes: major depressive disorder,  
32 depressive disorder not otherwise specified, dysthymic disorder, and/or dimensional constructs of  
33 depression, i.e. defined by scores from single- or multiple-item questionnaires, internalizing disorders or  
34 anxious depression. Studies focusing on anxiety without a measure of depression will not be included.  
35  
36  
37  
38

39 Studies including participants with bipolar disorders will be excluded given that sleep problems' prevalence  
40 differ significantly in bipolar versus unipolar disorders.<sup>47 62</sup> Outcome is measured by standardized and  
41 validated tools administered by a clinician, a researcher, and/or based on self-report, parent-report, and/or  
42 teacher-report questionnaires.  
43  
44  
45  
46

47 To be included, both exposure and outcome have to be measured at mean age  $\geq 5$  years and  $\leq 24$  and the  
48 time between the exposure and outcome is  $\geq$  one month. To address the research question on the role of  
49 insomnia and/or sleep disturbances as predictor of depression, only studies reporting on the exposure  
50 measured at least one month before the outcome will be included. When multiple assessments are  
51 conducted on the same cohort, each pair where both exposures and outcomes are measured at mean age  $\leq$   
52 24 and  $\geq 5$  years and exposures are measured before the outcome will be considered.  
53  
54  
55  
56  
57  
58  
59  
60

### *Confounders*

1  
2  
3 Studies will be included regardless of whether they contain estimates adjusted for common confounding  
4 factors, such as sex, socio-economic status, demographics, type of comorbidity at baseline. Studies that do  
5 not control for common confounding factors will be highlighted for potentially confounded results.  
6  
7  
8  
9

10 Identification of eligible studies and data extraction

### 11 *Search strategy*

12  
13 The following databases will be searched: EMBASE, MEDLINE, PsychINFO, Scopus and Web of Science. A  
14 draft of the Medline search strategy will be developed using a combination of MeSH and keywords terms  
15 relating to sleep disorders, depression/depressive disorder and children/adolescents/young adults with the  
16 help of a research librarian. The search will be limited to the years 1980 (to focus on current diagnostic  
17 terminology from the DSM III) to the present and will also be limited to observational studies using the search  
18 filter developed by the Scottish Intercollegiate Guidelines Network (SIGN). The draft Medline search will also  
19 be piloted to ensure the sensitivity and efficacy of the final search strategy and will also be reviewed by all of  
20 the participating authors (figure 1). The finalized Medline search will be adapted for each bibliographic  
21 database individually.  
22  
23  
24  
25  
26  
27  
28  
29

30  
31 Grey literature, i.e. dissertations and conference proceeding/papers, will be included in the search in order to  
32 mitigate against publication bias.<sup>63</sup> Dissertations have been noted as providing a valuable methodology and  
33 clinical source of information.<sup>64</sup> Additionally, searching for relevant conference proceedings/papers is  
34 recommended in order to identify recent, but unpublished research.<sup>65</sup>  
35  
36  
37  
38  
39

40 The grey literature will be screened for relevant material, including use of the search checklist Grey Matters:  
41 “A Practical Search Tool for Evidence-Based Medicine” from the Canadian Agency for Drugs and  
42 Technologies in Health (CADTH), and by also searching other sources to identify relevant dissertations/PhD  
43 theses and conference publications, i.e. Proquest Dissertations and Theses, ProceedingsFirst, PapersFirst,  
44 Conference Abstracts from Embase, Google Scholar Search. The references of selected articles will also be  
45 hand-searched for eligible studies and all the searches will be re-run just before the final analyses to identify  
46 additional relevant studies. Experts in the field will be contacted to locate potentially eligible studies and/or  
47 unpublished data.  
48  
49  
50  
51  
52  
53  
54  
55

### 56 *Selection of studies*

57  
58 Search results will be exported into Covidence, merged and checked for duplicates. For the selection of  
59 studies two students will be involved, with minimum an undergraduate level of education in a health-related  
60

1  
2  
3 field and previous experience with the systematic review methodology. They will be given the systematic  
4 review protocol and 5-hour training on the content of the systematic review and basic knowledge of the  
5 procedure. For the selection of studies based on title&abstract screening, eligible studies will be selected by  
6 two reviewers until a kappa score of 0.8 is achieved with the remainder being selected by one reviewer. Full  
7 text papers will be obtained for all references thought potentially eligible by a single reviewer based on  
8 title&abstract; all full text papers will be reviewed by two independent reviewers, with disagreements referred  
9 to a third, senior-author reviewer. The PRISMA search flow chart will be used to report the number of studies  
10 included and excluded at each step in the process, along with the rationale for the exclusion.  
11  
12  
13  
14  
15  
16  
17  
18  
19  
20  
21

### 22 *Data extraction*

23  
24 Data extraction will be conducted by one author and checked independently by a second author using a pre-  
25 defined data extraction form. Extracted variables will pertain to the following domains: general study  
26 information, study characteristics (i.e. year of publication, type of sample ascertainment, sample size),  
27 participant characteristics (i.e. age at baseline, age at follow up, number of follow up, interval between  
28 baseline and each follow-up, exposure and outcome definition and diagnostic tool, covariates that were  
29 adjusted in the analyses). Outcome data will include odds ratio, relative risk, hazard ratio, regression  
30 coefficients or correlation coefficients with their respective measurements of error and p-values. Information  
31 on the sources of funding for each study will be retrieved. Discrepancies between the two authors will be  
32 resolved by discussion with a third, senior-author reviewer. When relevant data are missing, corresponding  
33 authors will be contacted to obtain the information.  
34  
35  
36  
37  
38  
39  
40  
41  
42  
43  
44

### 45 *Risk of bias assessment*

46  
47 Risk of bias of included studies' results will be appraised using the Research Triangle Institute Item Bank  
48 (RTI-IB) tool. The RTI-IB is a practical, quality-scoring tool for observational studies with a focus on bias and  
49 precision.<sup>66</sup> It has a high inter-rater reliability (75%) and consists of 29 items tapping 12 domains (1)  
50 background, (2) sample definition and selection, (3) interventions/exposure, (4) outcomes, (5) creation of  
51 treatment groups, (6) blinding, (7) soundness of information, (8) follow-up, (9) analysis comparability, (10)  
52 analysis outcome, (11) interpretation, and (12) presentation and reporting. Possible response categories to  
53 each item are 'yes', 'no', 'partially', 'cannot determine', and 'not applicable'. The quality appraisal will be  
54 performed by two authors independently with discrepancies being resolved by discussion with a third, senior-  
55  
56  
57  
58  
59  
60

1  
2  
3 author reviewer. Results will be reported narratively and summarized in a descriptive table. Items will be  
4 subdivided into six categories: selection bias/confounding, performance bias, attrition bias, detection bias,  
5 reporting bias, and information bias. Items are scored as high, low, or unclear risk of bias. If at least one item  
6 in a category is scored as high, the risk of bias within this category is scored as moderate risk. If at least 50%  
7 of the items in a category are scored as high, the risk of the category is scored as high. Each study will  
8 receive a summary score that corresponds to the highest score obtained in any category.<sup>66</sup>  
9  
10  
11  
12  
13  
14  
15

### 16 *Description of primary studies and data analysis*

17  
18 Data will be synthesized by a table reporting study type, participant characteristics, exposure and outcome  
19 measures, and a second table on the risk of bias assessment. Studies will be combined based on  
20 similarities across relevant characteristics, e.g. type of sample ascertainment, age at baseline, duration of  
21 follow-up, exposure and outcome definition and diagnostic tool, and meta-analysis will be performed if  $\geq 3$   
22 studies are available. Heterogeneity of pooled estimates will be measured using the  $I^2$  statistic, which  
23 represents the percentage of variation attributable to between-study heterogeneity.  $I^2$  values of 25%, 50%,  
24 and 75% will be considered as low, medium, and high heterogeneity, respectively.<sup>67</sup> For the meta-analysis,  
25 the choice between a random-effect or fixed-effect model will be based both on the  $I^2$  statistics and the  
26 participant-level characteristics of the combined studies. Results of the meta-analyses will be summarized  
27 by a forest plot. Meta-analysis and test of heterogeneity will be performed using STATA 14 (StataCorp.  
28 2015. Stata Statistical Software: Release 14. College Station, TX: StataCorp LP). A narrative synthesis will  
29 be conducted in place of the meta-analysis, should this latter cannot be performed. To test the robustness of  
30 the primary hypothesis against study-level characteristics, e.g. risk-of-bias score, sample size, year of  
31 publication, sensitivity analyses will be performed by excluding those studies with the characteristic that can  
32 potentially be a source of heterogeneity, e.g. excluding studies with a high risk-of-bias score. Likewise, a  
33 sensitivity analysis will be performed by removing studies focusing on medically based sleep disorders, i.e.  
34 narcolepsy, breathing-related sleep disorders, central sleep apnea, non-rapid/rapid eye movement sleep  
35 disorder, restless legs syndrome, substance/medication-induced sleep disorder, and enuresis nocturna  
36 primaria, to prevent the possibility that the pooled estimates could be impacted by factors related to the  
37 chronicity of these conditions.  
38  
39  
40  
41  
42  
43  
44  
45  
46  
47  
48  
49  
50  
51  
52  
53  
54  
55

56 Subgroup analyses will be performed related to relevant participant-level characteristics, e.g. baseline  
57 comorbidity, age at baseline, gender, duration of follow up, exposure and outcome definition and diagnostic  
58 tool, by calculating pooled estimates in subgroups of studies, e.g. studies of children versus adolescents  
59  
60

1  
2  
3 versus young adults, and/or taking different estimates from the same study related to the subgroups of  
4 interest, e.g. male versus female. Subgroups will be defined depending on the amount and type of  
5 information retrieved.  
6

7  
8 To assess sensitivity of the pooled estimate to each included study, we will apply the leave-one-out  
9 method, which consists of repeating the analysis removing one study at a time.<sup>68</sup> Potential publication bias  
10 and other source of bias will be further assessed by visual inspection of the symmetry of funnel plots.  
11

12  
13 Quality of evidence will be rated using the Grading of Recommendations Assessment, Development, and  
14 Evaluation (GRADE) guidelines taking into account risk of bias, applying the RTI-IB tool; heterogeneity;  
15 directness, evaluating the relevance of the sample, the outcomes and the exposure; precision, examining  
16 the 95% confidence interval; and publication bias of the included studies. We will assess inter-rater  
17 agreement between investigators for study inclusion, data extraction, and methodological quality  
18 assessment using Kappa Cohen's coefficient.  
19  
20  
21  
22  
23  
24  
25  
26  
27

## 28 Discussion

29  
30 This systematic review and meta-analysis will synthesize and quantify the existing evidence on insomnia  
31 and/or sleep disturbances predicting depression in children and youth.  
32

33  
34 Understanding the magnitude of the risk of sleep problems predicting later depression in children and youth  
35 will contribute significantly to the development of treatment and secondary prevention strategies of  
36 depression.<sup>5 6 69</sup> Sleep is often impaired in child and youth depression.<sup>70</sup> Treating sleep problems in  
37 childhood can become an adjunctive tool to treat more effectively childhood depression but also to change  
38 the risk trajectories of depression, reducing the incidence and severity of depressive episodes later in life.  
39

40  
41 This study will also potentially inform strategies for primary prevention of depression in healthy children and  
42 youth. Sleep patterns physiologically change from birth to early adulthood as a consequence of a number of  
43 maturational changes in the brain, and as a result of an adjustment to the social environment.<sup>71 72</sup> The most  
44 evident change concerns the duration of sleep, which decreases from approximately 14 hours at 6 months  
45 of age to 8 hours at 16 years of age.<sup>73 74</sup> Another relevant maturational change concerns the sleep-onset  
46 time, which delays up to approximately 2 hours when transitioning to adolescence.<sup>75</sup> This process is typical  
47 of puberty, and it is part of the phase delay of a host of circadian rhythms related to gonadal hormones'  
48 changes.<sup>75</sup> The delay in sleep-onset time, called evening chronotype, manifests at a younger age in  
49 females than males, corresponding to the sex difference in the onset of puberty.<sup>72 75</sup> Evidence shows that  
50 over the last century child and youth sleep has consistently reduced beyond normative maturational  
51  
52  
53  
54  
55  
56  
57  
58  
59  
60

1  
2  
3 changes.<sup>76 77</sup> It has been claimed that this “epidemic” shortage of sleep might be related to the concomitant  
4 occurrence of the evening chronotype and earlier morning wake-up time of youth compared to younger  
5 children.<sup>78</sup> Other studies claim that decreased sleep in children and youth may instead be due to the  
6 increase of electronic screen media use during late hours.<sup>79</sup> As a result, an increasing proportion of  
7 otherwise healthy children and youth is exposed to insufficient sleep. An open question is whether this  
8 newly occurring, sleep-deprived child and youth cohort is at risk of depression. Understanding if the same  
9 risk pathway identified in affected or at-risk for depression individuals exists also in typically developing  
10 children and youth is essential to understand the size and potential consequences of the secular trend  
11 toward insufficient sleep and to eventually plan effective programs of primary prevention to reduce the  
12 incidence of depression.  
13  
14  
15  
16  
17  
18  
19  
20  
21  
22  
23

24 Ethics and dissemination: As this is a protocol for systematic review and meta-analysis of published data,  
25 ethics review and approval are not required. The findings will be published in a peer-reviewed journal and  
26 disseminated at scientific conferences.  
27  
28

29 Author contributions: CM, BA, MA and PS conceived the idea, planned and designed the study protocol.  
30 CM wrote the first draft. SB provided expertise to the search strategy. WW provided expertise to the data  
31 extraction and statistical analysis. JH provided critical insights. All authors have approved and contributed  
32 to the final written manuscript. CM guarantor of the review.  
33  
34  
35  
36

37 Funding statement: This work was supported by the Cundill Centre for Child and Youth Depression, Centre  
38 for Addiction and Mental Health, Toronto, Ontario, Canada. Funder’s roles consist of evaluating and funding  
39 the grant application if suitable, monitoring and evaluating research outputs, facilitating the implementation  
40 of findings in health care, the interaction between researchers and research users, and the dissemination  
41 research findings.  
42  
43  
44  
45  
46

47 Competing interests statement. None declared.  
48

49 Word Count: 4,130 words.  
50

51 Patients or the public WERE NOT involved in the design, or conduct, or reporting, or dissemination of our  
52 research  
53  
54  
55

## 56 References 57 58 59 60



1  
2  
3  
4  
5  
6  
7  
8  
9  
10  
11  
12  
13  
14  
15  
16  
17  
18  
19  
20  
21  
22  
23  
24  
25  
26  
27  
28  
29  
30  
31  
32  
33  
34  
35  
36  
37  
38  
39  
40  
41  
42  
43  
44  
45  
46  
47  
48  
49  
50  
51  
52  
53  
54  
55  
56  
57  
58  
59  
60

1. Ghandour RM, Sherman LJ, Vladutiu CJ, et al. Prevalence and Treatment of Depression, Anxiety, and Conduct Problems in US Children. *J Pediatr* 2019;206:256-67 e3. doi: 10.1016/j.jpeds.2018.09.021 [published Online First: 2018/10/17]
2. Avenevoli S, Swendsen J, He JP, et al. Major depression in the national comorbidity survey-adolescent supplement: prevalence, correlates, and treatment. *J Am Acad Child Adolesc Psychiatry* 2015;54(1):37-44 e2. doi: 10.1016/j.jaac.2014.10.010 [published Online First: 2014/12/20]
3. Park RJ, Goodyer IM. Clinical guidelines for depressive disorders in childhood and adolescence. *Eur Child Adolesc Psychiatry* 2000;9(3):147-61. [published Online First: 2000/11/30]
4. Cipriani A, Zhou X, Del Giovane C, et al. Comparative efficacy and tolerability of antidepressants for major depressive disorder in children and adolescents: a network meta-analysis. *Lancet* 2016;388(10047):881-90. doi: 10.1016/S0140-6736(16)30385-3 [published Online First: 2016/06/13]
5. Eckshtain D, Kuppens S, Ugueto A, et al. Meta-Analysis: 13-Year Follow-up of Psychotherapy Effects on Youth Depression. *J Am Acad Child Adolesc Psychiatry* 2019 doi: 10.1016/j.jaac.2019.04.002 [published Online First: 2019/04/21]
6. Weisz JR, Kuppens S, Ng MY, et al. Are Psychotherapies for Young People Growing Stronger? Tracking Trends Over Time for Youth Anxiety, Depression, Attention-Deficit/Hyperactivity Disorder, and Conduct Problems. *Perspect Psychol Sci* 2019;14(2):216-37. doi: 10.1177/1745691618805436 [published Online First: 2018/12/21]
7. Gapstur SM, Drope JM, Jacobs EJ, et al. A blueprint for the primary prevention of cancer: Targeting established, modifiable risk factors. *CA Cancer J Clin* 2018;68(6):446-70. doi: 10.3322/caac.21496 [published Online First: 2018/10/12]
8. Cairns KE, Yap MB, Pilkington PD, et al. Risk and protective factors for depression that adolescents can modify: a systematic review and meta-analysis of longitudinal studies. *J Affect Disord* 2014;169:61-75. doi: 10.1016/j.jad.2014.08.006 [published Online First: 2014/08/27]
9. Christensen H, Batterham PJ, Gosling JA, et al. Effectiveness of an online insomnia program (SHUTi) for prevention of depressive episodes (the GoodNight Study): a randomised controlled trial. *Lancet Psychiatry* 2016;3(4):333-41. doi: 10.1016/S2215-0366(15)00536-2 [published Online First: 2016/02/02]
10. Freeman D, Sheaves B, Goodwin GM, et al. The effects of improving sleep on mental health (OASIS): a randomised controlled trial with mediation analysis. *Lancet Psychiatry* 2017;4(10):749-58. doi: 10.1016/S2215-0366(17)30328-0 [published Online First: 2017/09/11]

- 1  
2  
3 11. Ye YY, Zhang YF, Chen J, et al. Internet-Based Cognitive Behavioral Therapy for Insomnia (ICBT-i)  
4 Improves Comorbid Anxiety and Depression-A Meta-Analysis of Randomized Controlled Trials.  
5 *PLoS One* 2015;10(11):e0142258. doi: 10.1371/journal.pone.0142258 [published Online First:  
6 2015/11/19]  
7  
8  
9  
10 12. Werner-Seidler A, Wong Q, Johnston L, et al. Pilot evaluation of the Sleep Ninja: a smartphone  
11 application for adolescent insomnia symptoms. *BMJ open* 2019;9(5):e026502. doi:  
12 10.1136/bmjopen-2018-026502 [published Online First: 2019/05/28]  
13  
14  
15  
16 13. Waloszek JM, Schwartz O, Simmons JG, et al. The SENSE Study (Sleep and Education: learning New  
17 Skills Early): a community cognitive-behavioural therapy and mindfulness-based sleep intervention  
18 to prevent depression and improve cardiac health in adolescence. *BMC Psychol* 2015;3:39. doi:  
19 10.1186/s40359-015-0096-x  
20  
21  
22  
23 14. Blake M, Waloszek JM, Schwartz O, et al. The SENSE study: Post intervention effects of a randomized  
24 controlled trial of a cognitive-behavioral and mindfulness-based group sleep improvement  
25 intervention among at-risk adolescents. *J Consult Clin Psychol* 2016;84(12):1039-51. doi:  
26 10.1037/ccp0000142  
27  
28  
29  
30 15. Blake M, Schwartz O, Waloszek JM, et al. The SENSE Study: Treatment Mechanisms of a Cognitive  
31 Behavioral and Mindfulness-Based Group Sleep Improvement Intervention for At-Risk Adolescents.  
32 *Sleep* 2017;40(6) doi: 10.1093/sleep/zsx061  
33  
34  
35  
36 16. Kirschbaum-Lesch I, Gest S, Legenbauer T, et al. Feasibility and Efficacy of Bright Light Therapy in  
37 Depressed Adolescent Inpatients. *Zeitschrift für Kinder- und Jugendpsychiatrie und Psychotherapie*  
38 2018;46(5):423-29. doi: 10.1024/1422-4917/a000603 [published Online First: 2018/07/18]  
39  
40  
41  
42 17. de Bruin EJ, Bogels SM, Oort FJ, et al. Improvements of adolescent psychopathology after insomnia  
43 treatment: results from a randomized controlled trial over 1 year. *Journal of child psychology and*  
44 *psychiatry, and allied disciplines* 2018;59(5):509-22. doi: 10.1111/jcpp.12834 [published Online First:  
45 2017/10/21]  
46  
47  
48  
49 18. Dewald-Kaufmann JF, Oort FJ, Meijer AM. The effects of sleep extension and sleep hygiene advice on  
50 sleep and depressive symptoms in adolescents: a randomized controlled trial. *Journal of child*  
51 *psychology and psychiatry, and allied disciplines* 2014;55(3):273-83. doi: 10.1111/jcpp.12157  
52 [published Online First: 2013/11/21]  
53  
54  
55  
56  
57  
58  
59  
60

1  
2  
3  
4  
5  
6  
7  
8  
9  
10  
11  
12  
13  
14  
15  
16  
17  
18  
19  
20  
21  
22  
23  
24  
25  
26  
27  
28  
29  
30  
31  
32  
33  
34  
35  
36  
37  
38  
39  
40  
41  
42  
43  
44  
45  
46  
47  
48  
49  
50  
51  
52  
53  
54  
55  
56  
57  
58  
59  
60

19. Fang H, Tu S, Sheng J, et al. Depression in sleep disturbance: A review on a bidirectional relationship, mechanisms and treatment. *J Cell Mol Med* 2019;23(4):2324-32. doi: 10.1111/jcmm.14170 [published Online First: 2019/02/09]
20. Barclay NL, Gehrman PR, Gregory AM, et al. The heritability of insomnia progression during childhood/adolescence: results from a longitudinal twin study. *Sleep* 2015;38(1):109-18. doi: 10.5665/sleep.4334 [published Online First: 2014/10/18]
21. Cole MG, Dendukuri N. Risk factors for depression among elderly community subjects: a systematic review and meta-analysis. *Am J Psychiatry* 2003;160(6):1147-56. doi: 10.1176/appi.ajp.160.6.1147 [published Online First: 2003/06/05]
22. Pigeon WR, Bishop TM, Krueger KM. Insomnia as a Precipitating Factor in New Onset Mental Illness: a Systematic Review of Recent Findings. *Curr Psychiatry Rep* 2017;19(8):44. doi: 10.1007/s11920-017-0802-x [published Online First: 2017/06/16]
23. Bao YP, Han Y, Ma J, et al. Cooccurrence and bidirectional prediction of sleep disturbances and depression in older adults: Meta-analysis and systematic review. *Neurosci Biobehav Rev* 2017;75:257-73. doi: 10.1016/j.neubiorev.2017.01.032 [published Online First: 2017/02/10]
24. Hertenstein E, Feige B, Gmeiner T, et al. Insomnia as a predictor of mental disorders: A systematic review and meta-analysis. *Sleep Med Rev* 2019;43:96-105. doi: 10.1016/j.smrv.2018.10.006 [published Online First: 2018/12/12]
25. Li L, Wu C, Gan Y, et al. Insomnia and the risk of depression: a meta-analysis of prospective cohort studies. *BMC Psychiatry* 2016;16(1):375. doi: 10.1186/s12888-016-1075-3 [published Online First: 2016/11/07]
26. Baglioni C, Battagliese G, Feige B, et al. Insomnia as a predictor of depression: a meta-analytic evaluation of longitudinal epidemiological studies. *J Affect Disord* 2011;135(1-3):10-9. doi: 10.1016/j.jad.2011.01.011 [published Online First: 2011/02/09]
27. Roberts RE, Roberts CR, Chen IG. Impact of insomnia on future functioning of adolescents. *J Psychosom Res* 2002;53(1):561-9. [published Online First: 2002/07/20]
28. Roane BM, Taylor DJ. Adolescent insomnia as a risk factor for early adult depression and substance abuse. *Sleep* 2008;31(10):1351-6. [published Online First: 2008/10/16]
29. Johnson EO, Chilcoat HD, Breslau N. Trouble sleeping and anxiety/depression in childhood. *Psychiatry Res* 2000;94(2):93-102. [published Online First: 2000/05/16]

- 1  
2  
3 30. Alvaro PK, Roberts RM, Harris JK, et al. The direction of the relationship between symptoms of insomnia  
4 and psychiatric disorders in adolescents. *J Affect Disord* 2017;207:167-74. doi:  
5 10.1016/j.jad.2016.08.032 [published Online First: 2016/10/11]  
6  
7  
8  
9 31. Ritter PS, Hofler M, Wittchen HU, et al. Disturbed sleep as risk factor for the subsequent onset of bipolar  
10 disorder--Data from a 10-year prospective-longitudinal study among adolescents and young adults. *J*  
11 *Psychiatr Res* 2015;68:76-82. doi: 10.1016/j.jpsychires.2015.06.005 [published Online First:  
12 2015/08/01]  
13  
14  
15  
16 32. Hayley AC, Skogen JC, Sivertsen B, et al. Symptoms of Depression and Difficulty Initiating Sleep from  
17 Early Adolescence to Early Adulthood: A Longitudinal Study. *Sleep* 2015;38(10):1599-606. doi:  
18 10.5665/sleep.5056 [published Online First: 2015/07/22]  
19  
20  
21  
22 33. Armstrong JM, Ruttle PL, Klein MH, et al. Associations of child insomnia, sleep movement, and their  
23 persistence with mental health symptoms in childhood and adolescence. *Sleep* 2014;37(5):901-9.  
24 doi: 10.5665/sleep.3656 [published Online First: 2014/05/03]  
25  
26  
27  
28 34. Armitage R, Hoffmann RF, Emslie GJ, et al. Sleep microarchitecture as a predictor of recurrence in  
29 children and adolescents with depression. *Int J Neuropsychopharmacol* 2002;5(3):217-28. doi:  
30 10.1017/S1461145702002948 [published Online First: 2002/10/09]  
31  
32  
33  
34 35. Gregory AM, O'Connor TG. Sleep problems in childhood: a longitudinal study of developmental change  
35 and association with behavioral problems. *J Am Acad Child Adolesc Psychiatry* 2002;41(8):964-71.  
36 doi: 10.1097/00004583-200208000-00015 [published Online First: 2002/08/07]  
37  
38  
39  
40 36. Fredriksen K, Rhodes J, Reddy R, et al. Sleepless in Chicago: tracking the effects of adolescent sleep  
41 loss during the middle school years. *Child Dev* 2004;75(1):84-95. [published Online First:  
42 2004/03/16]  
43  
44  
45 37. Gregory AM, Caspi A, Eley TC, et al. Prospective longitudinal associations between persistent sleep  
46 problems in childhood and anxiety and depression disorders in adulthood. *J Abnorm Child Psychol*  
47 2005;33(2):157-63. [published Online First: 2005/04/21]  
48  
49  
50  
51 38. Gregory AM, Van der Ende J, Willis TA, et al. Parent-reported sleep problems during development and  
52 self-reported anxiety/depression, attention problems, and aggressive behavior later in life. *Arch*  
53 *Pediatr Adolesc Med* 2008;162(4):330-5. doi: 10.1001/archpedi.162.4.330 [published Online First:  
54 2008/04/09]  
55  
56  
57  
58  
59  
60

1  
2  
3  
4  
5  
6  
7  
8  
9  
10  
11  
12  
13  
14  
15  
16  
17  
18  
19  
20  
21  
22  
23  
24  
25  
26  
27  
28  
29  
30  
31  
32  
33  
34  
35  
36  
37  
38  
39  
40  
41  
42  
43  
44  
45  
46  
47  
48  
49  
50  
51  
52  
53  
54  
55  
56  
57  
58  
59  
60

39. Gregory AM, Rijdsdijk FV, Lau JY, et al. The direction of longitudinal associations between sleep problems and depression symptoms: a study of twins aged 8 and 10 years. *Sleep* 2009;32(2):189-99. doi: 10.1093/sleep/32.2.189 [published Online First: 2009/02/26]
40. Touchette E, Chollet A, Galera C, et al. Prior sleep problems predict internalising problems later in life. *J Affect Disord* 2012;143(1-3):166-71. doi: 10.1016/j.jad.2012.05.049 [published Online First: 2012/08/04]
41. Greene G, Gregory AM, Fone D, et al. Childhood sleeping difficulties and depression in adulthood: the 1970 British Cohort Study. *J Sleep Res* 2015;24(1):19-23. doi: 10.1111/jsr.12200 [published Online First: 2014/09/03]
42. Wang B, Eastwood PR, Becker A, et al. Concurrent developmental course of sleep problems and emotional/behavioral problems in childhood and adolescence as reflected by the dysregulation profile. *Sleep* 2019;42(3) doi: 10.1093/sleep/zsy243 [published Online First: 2018/12/07]
43. Wang B, Isensee C, Becker A, et al. Developmental Trajectories of Sleep Problems from Childhood to Adolescence Both Predict and Are Predicted by Emotional and Behavioral Problems. *Front Psychol* 2016;7:1874. doi: 10.3389/fpsyg.2016.01874 [published Online First: 2016/12/19]
44. McCracken JT, Poland RE, Lutchmansingh P, et al. Sleep electroencephalographic abnormalities in adolescent depressives: effects of scopolamine. *Biol Psychiatry* 1997;42(7):577-84. doi: 10.1016/S0006-3223(96)00431-3 [published Online First: 1997/10/06]
45. Rao U, McCracken JT, Lutchmansingh P, et al. Electroencephalographic sleep and urinary free cortisol in adolescent depression: a preliminary report of changes from episode to recovery. *Biol Psychiatry* 1997;41(3):369-73. [published Online First: 1997/02/01]
46. Rao U, Dahl RE, Ryan ND, et al. The relationship between longitudinal clinical course and sleep and cortisol changes in adolescent depression. *Biol Psychiatry* 1996;40(6):474-84. doi: 10.1016/0006-3223(95)00481-5 [published Online First: 1996/09/15]
47. Rao U, Dahl RE, Ryan ND, et al. Heterogeneity in EEG sleep findings in adolescent depression: unipolar versus bipolar clinical course. *J Affect Disord* 2002;70(3):273-80. [published Online First: 2002/07/20]
48. Rao U, Poland RE. Electroencephalographic sleep and hypothalamic-pituitary-adrenal changes from episode to recovery in depressed adolescents. *J Child Adolesc Psychopharmacol* 2008;18(6):607-13. doi: 10.1089/cap.2008.034 [published Online First: 2008/12/26]

- 1  
2  
3 49. Shain BN, Naylor M, Shipley JE, et al. Imipramine effects on sleep in depressed adolescents: a  
4 preliminary report. *Biol Psychiatry* 1990;28(5):459-62. [published Online First: 1990/09/01]  
5  
6  
7 50. Goetz RR, Wolk SI, Coplan JD, et al. Premorbid polysomnographic signs in depressed adolescents: a  
8 reanalysis of EEG sleep after longitudinal follow-up in adulthood. *Biol Psychiatry* 2001;49(11):930-  
9 42. [published Online First: 2001/05/30]  
10  
11  
12 51. Lovato N, Gradisar M. A meta-analysis and model of the relationship between sleep and depression in  
13 adolescents: recommendations for future research and clinical practice. *Sleep Med Rev*  
14 2014;18(6):521-9. doi: 10.1016/j.smrv.2014.03.006 [published Online First: 2014/05/27]  
15  
16  
17 52. Zisapel N. Paediatric use of melatonin: Letter to the Editor regarding the manuscript "Current role of  
18 melatonin in pediatric neurology: Clinical recommendations" by Bruni et al. *Eur J Paediatr Neurol*.  
19 2015 Mar;19(2):122-33. *Eur J Paediatr Neurol* 2017;21(2):418-19. doi: 10.1016/j.ejpn.2016.07.013  
20  
21  
22 [published Online First: 2016/08/16]  
23  
24  
25 53. Bruni O, Alonso-Alconada D, Besag F, et al. Current role of melatonin in pediatric neurology: clinical  
26 recommendations. *Eur J Paediatr Neurol* 2015;19(2):122-33. doi: 10.1016/j.ejpn.2014.12.007  
27  
28  
29 [published Online First: 2015/01/03]  
30  
31  
32 54. Ma ZR, Shi LJ, Deng MH. Efficacy of cognitive behavioral therapy in children and adolescents with  
33 insomnia: a systematic review and meta-analysis. *Braz J Med Biol Res* 2018;51(6):e7070. doi:  
34 10.1590/1414-431x20187070 [published Online First: 2018/05/24]  
35  
36  
37 55. Kalak N, Gerber M, Kirov R, et al. Daily morning running for 3 weeks improved sleep and psychological  
38 functioning in healthy adolescents compared with controls. *J Adolesc Health* 2012;51(6):615-22. doi:  
39 10.1016/j.jadohealth.2012.02.020 [published Online First: 2012/11/24]  
40  
41  
42 56. van Maanen A, Meijer AM, Smits MG, et al. Effects of Melatonin and Bright Light Treatment in Childhood  
43 Chronic Sleep Onset Insomnia With Late Melatonin Onset: A Randomized Controlled Study. *Sleep*  
44 2017;40(2) doi: 10.1093/sleep/zsw038 [published Online First: 2017/04/02]  
45  
46  
47 57. Meltzer LJ, Johnson C, Crosette J, et al. Prevalence of diagnosed sleep disorders in pediatric primary  
48 care practices. *Pediatrics* 2010;125(6):e1410-8. doi: 10.1542/peds.2009-2725 [published Online  
49 First: 2010/05/12]  
50  
51  
52 58. Meltzer LJ, Plaufcan MR, Thomas JH, et al. Sleep problems and sleep disorders in pediatric primary  
53 care: treatment recommendations, persistence, and health care utilization. *J Clin Sleep Med*  
54 2014;10(4):421-6. doi: 10.5664/jcsm.3620 [published Online First: 2014/04/16]  
55  
56  
57  
58  
59  
60

1  
2  
3  
4  
5  
6  
7  
8  
9  
10  
11  
12  
13  
14  
15  
16  
17  
18  
19  
20  
21  
22  
23  
24  
25  
26  
27  
28  
29  
30  
31  
32  
33  
34  
35  
36  
37  
38  
39  
40  
41  
42  
43  
44  
45  
46  
47  
48  
49  
50  
51  
52  
53  
54  
55  
56  
57  
58  
59  
60

59. Moher D, Shamseer L, Clarke M, et al. Preferred reporting items for systematic review and meta-analysis protocols (PRISMA-P) 2015 statement. *Syst Rev* 2015;4:1. doi: 10.1186/2046-4053-4-1 [published Online First: 2015/01/03]
60. Stroup DF, Berlin JA, Morton SC, et al. Meta-analysis of observational studies in epidemiology: a proposal for reporting. Meta-analysis Of Observational Studies in Epidemiology (MOOSE) group. *JAMA* 2000;283(15):2008-12. doi: 10.1001/jama.283.15.2008 [published Online First: 2000/05/02]
61. Bundy DAP, de Silva N, Horton S, et al. Investment in child and adolescent health and development: key messages from Disease Control Priorities, 3rd Edition. *Lancet* 2018;391(10121):687-99. doi: 10.1016/S0140-6736(17)32417-0 [published Online First: 2017/11/21]
62. Lai YC, Huang MC, Chen HC, et al. Familiality and clinical outcomes of sleep disturbances in major depressive and bipolar disorders. *J Psychosom Res* 2014;76(1):61-7. doi: 10.1016/j.jpsychores.2013.10.020 [published Online First: 2013/12/24]
63. Paez A. Gray literature: An important resource in systematic reviews. *J Evid Based Med* 2017;10(3):233-40. doi: 10.1111/jebm.12266 [published Online First: 2017/09/01]
64. McLeod BD, Weisz JR. Using dissertations to examine potential bias in child and adolescent clinical trials. *J Consult Clin Psychol* 2004;72(2):235-51. doi: 10.1037/0022-006X.72.2.235 [published Online First: 2004/04/07]
65. Scherer RW, Langenberg P, von Elm E. Full publication of results initially presented in abstracts. *Cochrane Database Syst Rev* 2007(2):MR000005. doi: 10.1002/14651858.MR000005.pub3 [published Online First: 2007/04/20]
66. Viswanathan M, Berkman ND. Development of the RTI item bank on risk of bias and precision of observational studies. *J Clin Epidemiol* 2012;65(2):163-78. doi: 10.1016/j.jclinepi.2011.05.008 [published Online First: 2011/10/01]
67. Higgins JP, Thompson SG. Quantifying heterogeneity in a meta-analysis. *Stat Med* 2002;21(11):1539-58. doi: 10.1002/sim.1186 [published Online First: 2002/07/12]
68. Patsopoulos NA, Evangelou E, Ioannidis JP. Sensitivity of between-study heterogeneity in meta-analysis: proposed metrics and empirical evaluation. *Int J Epidemiol* 2008;37(5):1148-57. doi: 10.1093/ije/dyn065 [published Online First: 2008/04/22]
69. Gregory AM, Sadeh A. Sleep, emotional and behavioral difficulties in children and adolescents. *Sleep Med Rev* 2012;16(2):129-36. doi: 10.1016/j.smrv.2011.03.007 [published Online First: 2011/06/17]

- 1  
2  
3 70. Rao U, Chen LA. Characteristics, correlates, and outcomes of childhood and adolescent depressive  
4 disorders. *Dialogues Clin Neurosci* 2009;11(1):45-62. [published Online First: 2009/05/13]  
5  
6  
7 71. Galland BC, Taylor BJ, Elder DE, et al. Normal sleep patterns in infants and children: a systematic  
8 review of observational studies. *Sleep Med Rev* 2012;16(3):213-22. doi: 10.1016/j.smrv.2011.06.001  
9 [published Online First: 2011/07/26]  
10  
11  
12 72. Tarokh L, Saletin JM, Carskadon MA. Sleep in adolescence: Physiology, cognition and mental health.  
13 *Neurosci Biobehav Rev* 2016;70:182-88. doi: 10.1016/j.neubiorev.2016.08.008 [published Online  
14 First: 2016/10/22]  
15  
16  
17 73. Jenni OG, Molinari L, Cafilisch JA, et al. Sleep duration from ages 1 to 10 years: variability and stability in  
18 comparison with growth. *Pediatrics* 2007;120(4):e769-76. doi: 10.1542/peds.2006-3300 [published  
19 Online First: 2007/10/03]  
20  
21  
22 74. Iglowstein I, Jenni OG, Molinari L, et al. Sleep duration from infancy to adolescence: reference values  
23 and generational trends. *Pediatrics* 2003;111(2):302-7. doi: 10.1542/peds.111.2.302 [published  
24 Online First: 2003/02/04]  
25  
26  
27 75. Hummer DL, Lee TM. Daily timing of the adolescent sleep phase: Insights from a cross-species  
28 comparison. *Neurosci Biobehav Rev* 2016;70:171-81. doi: 10.1016/j.neubiorev.2016.07.023  
29 [published Online First: 2016/10/22]  
30  
31  
32 76. Matricciani L, Olds T, Petkov J. In search of lost sleep: secular trends in the sleep time of school-aged  
33 children and adolescents. *Sleep Med Rev* 2012;16(3):203-11. doi: 10.1016/j.smrv.2011.03.005  
34 [published Online First: 2011/05/27]  
35  
36  
37 77. Keyes KM, Maslowsky J, Hamilton A, et al. The great sleep recession: changes in sleep duration among  
38 US adolescents, 1991-2012. *Pediatrics* 2015;135(3):460-8. doi: 10.1542/peds.2014-2707 [published  
39 Online First: 2015/02/18]  
40  
41  
42 78. Adolescent Sleep Working G, Committee on A, Council on School H. School start times for adolescents.  
43 *Pediatrics* 2014;134(3):642-9. doi: 10.1542/peds.2014-1697 [published Online First: 2014/08/27]  
44  
45  
46 79. Stiglic N, Viner RM. Effects of screentime on the health and well-being of children and adolescents: a  
47 systematic review of reviews. *BMJ open* 2019;9(1):e023191. doi: 10.1136/bmjopen-2018-023191  
48 [published Online First: 2019/01/05]  
49  
50  
51  
52  
53  
54  
55  
56  
57  
58  
59  
60



1  
2  
3  
4  
5  
6  
7  
8  
9  
10  
11  
12  
13  
14  
15  
16  
17  
18  
19  
20  
21  
22  
23  
24  
25  
26  
27  
28  
29  
30  
31  
32  
33  
34  
35  
36  
37  
38  
39  
40  
41  
42  
43  
44  
45  
46  
47  
48  
49  
50  
51  
52  
53  
54  
55  
56  
57  
58  
59  
60

Figure 1: Database: Ovid MEDLINE: Epub Ahead of Print, In-Process & Other Non-Indexed Citations, Ovid MEDLINE® Daily and Ovid MEDLINE® <1946-Present>

Search Strategy:

- 1 exp Sleep Wake Disorders/
- 2 exp Sleep/
- 3 (apnea\$ adj3 sleep\$).mp.
- 4 (restless adj3 leg\$ adj3 syndrome\$).mp.
- 5 narcolep\$.mp.
- 6 (night\$ adj3 terror\$).mp.
- 7 sleep\$.mp.
- 8 dyssomni\$.mp.
- 9 parasomni\$.mp.
- 10 insomni\$.mp.
- 11 exp Depressive Disorder/
- 12 exp Depression/
- 13 depress\$.mp.
- 14 exp Child/
- 15 exp Adolescents/
- 16 exp Young Adult/
- 17 (child\$ or juvenile\$ or pubescen\$ or prepubescen\* or pre-pubescen\* or teen\$ or preteen\$ or tween\$ or youth\$ or adoles\$ or young\$ adult\$ or emerg\$ adult\$).mp.
- 18 exp Epidemiologic studies/
- 19 exp Case control studies/
- 20 exp Cohort studies/
- 21 case control.tw.
- 22 (cohort adj (study or studies)).tw.
- 23 cohort analy\$.tw.
- 24 (follow up adj (study or studies)).tw.
- 25 (observational adj (study or studies)).tw.
- 26 longitudinal.tw.

1  
2  
3 27 *retrospective.tw.*  
4  
5 28 *cross sectional.tw.*  
6  
7 29 *cross-sectional studies/*  
8  
9 30 *or/1-10*  
10  
11 31 *or/11-13*  
12  
13 32 *or/14-17*  
14  
15 33 *or/18-29*  
16  
17 34 *30 and 31 and 32 and 33*  
18  
19 35 *limit 34 to yr="1980 -Current"*  
20  
21  
22  
23  
24  
25  
26  
27  
28  
29  
30  
31  
32  
33  
34  
35  
36  
37  
38  
39  
40  
41  
42  
43  
44  
45  
46  
47  
48  
49  
50  
51  
52  
53  
54  
55  
56  
57  
58  
59  
60

# Reporting checklist for protocol of a systematic review.

Based on the PRISMA-P guidelines.

## Instructions to authors

Complete this checklist by entering the page numbers from your manuscript where readers will find each of the items listed below.

Your article may not currently address all the items on the checklist. Please modify your text to include the missing information. If you are certain that an item does not apply, please write "n/a" and provide a short explanation.

Upload your completed checklist as an extra file when you submit to a journal.

In your methods section, say that you used the PRISMA-Preporting guidelines, and cite them as:

Moher D, Shamseer L, Clarke M, Ghersi D, Liberati A, Petticrew M, Shekelle P, Stewart LA. Preferred Reporting Items for Systematic Review and Meta-Analysis Protocols (PRISMA-P) 2015 statement. Syst Rev. 2015;4(1):1.

| Reporting Item      |                                                                                                                                                               | Page Number |
|---------------------|---------------------------------------------------------------------------------------------------------------------------------------------------------------|-------------|
| <b>Title</b>        |                                                                                                                                                               |             |
| Identification      | <a href="#">#1a</a> Identify the report as a protocol of a systematic review                                                                                  | 1           |
| Update              | <a href="#">#1b</a> If the protocol is for an update of a previous systematic review, identify as such                                                        | n/a         |
| <b>Registration</b> |                                                                                                                                                               |             |
|                     | <a href="#">#2</a> If registered, provide the name of the registry (such as PROSPERO) and registration number                                                 | 2           |
| <b>Authors</b>      |                                                                                                                                                               |             |
| Contact             | <a href="#">#3a</a> Provide name, institutional affiliation, e-mail address of all protocol authors; provide physical mailing address of corresponding author | 1           |
| Contribution        | <a href="#">#3b</a> Describe contributions of protocol authors and identify the guarantor of the review                                                       | 12          |
| <b>Amendments</b>   |                                                                                                                                                               |             |

|    |                      |                                                                                               |     |
|----|----------------------|-----------------------------------------------------------------------------------------------|-----|
| 1  | <a href="#">#4</a>   | If the protocol represents an amendment of a previously completed or                          | n/a |
| 2  |                      | published protocol, identify as such and list changes; otherwise, state                       |     |
| 3  |                      | plan for documenting important protocol amendments                                            |     |
| 4  |                      |                                                                                               |     |
| 5  |                      |                                                                                               |     |
| 6  | <b>Support</b>       |                                                                                               |     |
| 7  |                      |                                                                                               |     |
| 8  | Sources              | <a href="#">#5a</a> Indicate sources of financial or other support for the review             | 12  |
| 9  |                      |                                                                                               |     |
| 10 | Sponsor              | <a href="#">#5b</a> Provide name for the review funder and / or sponsor                       | n/a |
| 11 |                      |                                                                                               |     |
| 12 | Role of sponsor or   | <a href="#">#5c</a> Describe roles of funder(s), sponsor(s), and / or institution(s), if any, | 12  |
| 13 | funder               | in developing the protocol                                                                    |     |
| 14 |                      |                                                                                               |     |
| 15 |                      |                                                                                               |     |
| 16 | <b>Introduction</b>  |                                                                                               |     |
| 17 |                      |                                                                                               |     |
| 18 | Rationale            | <a href="#">#6</a> Describe the rationale for the review in the context of what is already    | 3-5 |
| 19 |                      | known                                                                                         |     |
| 20 | Objectives           | <a href="#">#7</a> Provide an explicit statement of the question(s) the review will           | 6   |
| 21 |                      | address with reference to participants, interventions, comparators, and                       |     |
| 22 |                      | outcomes (PICO)                                                                               |     |
| 23 |                      |                                                                                               |     |
| 24 |                      |                                                                                               |     |
| 25 |                      |                                                                                               |     |
| 26 |                      |                                                                                               |     |
| 27 |                      |                                                                                               |     |
| 28 | <b>Methods</b>       |                                                                                               |     |
| 29 |                      |                                                                                               |     |
| 30 | Eligibility criteria | <a href="#">#8</a> Specify the study characteristics (such as PICO, study design, setting,    | 6-7 |
| 31 |                      | time frame) and report characteristics (such as years considered,                             |     |
| 32 |                      | language, publication status) to be used as criteria for eligibility for                      |     |
| 33 |                      | the review                                                                                    |     |
| 34 |                      |                                                                                               |     |
| 35 |                      |                                                                                               |     |
| 36 |                      |                                                                                               |     |
| 37 | Information sources  | <a href="#">#9</a> Describe all intended information sources (such as electronic              | 8   |
| 38 |                      | databases, contact with study authors, trial registers or other grey                          |     |
| 39 |                      | literature sources) with planned dates of coverage                                            |     |
| 40 |                      |                                                                                               |     |
| 41 |                      |                                                                                               |     |
| 42 |                      |                                                                                               |     |
| 43 | Search strategy      | <a href="#">#10</a> Present draft of search strategy to be used for at least one electronic   | 8   |
| 44 |                      | database, including planned limits, such that it could be repeated                            |     |
| 45 |                      |                                                                                               |     |
| 46 |                      |                                                                                               |     |
| 47 | Study records - data | <a href="#">#11a</a> Describe the mechanism(s) that will be used to manage records and        | 9   |
| 48 | management           | data throughout the review                                                                    |     |
| 49 |                      |                                                                                               |     |
| 50 | Study records -      | <a href="#">#11b</a> State the process that will be used for selecting studies (such as two   | 9   |
| 51 | selection process    | independent reviewers) through each phase of the review (that is,                             |     |
| 52 |                      | screening, eligibility and inclusion in meta-analysis)                                        |     |
| 53 |                      |                                                                                               |     |
| 54 |                      |                                                                                               |     |
| 55 |                      |                                                                                               |     |
| 56 | Study records - data | <a href="#">#11c</a> Describe planned method of extracting data from reports (such as         | 10  |
| 57 | collection process   | piloting forms, done independently, in duplicate), any processes for                          |     |
| 58 |                      |                                                                                               |     |
| 59 |                      |                                                                                               |     |
| 60 |                      |                                                                                               |     |

|    |                    |                                                                                           |       |
|----|--------------------|-------------------------------------------------------------------------------------------|-------|
|    |                    | obtaining and confirming data from investigators                                          |       |
| 1  |                    |                                                                                           |       |
| 2  |                    |                                                                                           |       |
| 3  | Data items         | <a href="#">#12</a> List and define all variables for which data will be sought (such as  | 10    |
| 4  |                    | PICO items, funding sources), any pre-planned data assumptions and                        |       |
| 5  |                    | simplifications                                                                           |       |
| 6  |                    |                                                                                           |       |
| 7  |                    |                                                                                           |       |
| 8  | Outcomes and       | <a href="#">#13</a> List and define all outcomes for which data will be sought, including | 9-10  |
| 9  | prioritization     | prioritization of main and additional outcomes, with rationale                            |       |
| 10 |                    |                                                                                           |       |
| 11 |                    |                                                                                           |       |
| 12 | Risk of bias in    | <a href="#">#14</a> Describe anticipated methods for assessing risk of bias of individual | 10    |
| 13 | individual studies | studies, including whether this will be done at the outcome or study                      |       |
| 14 |                    | level, or both; state how this information will be used in data synthesis                 |       |
| 15 |                    |                                                                                           |       |
| 16 |                    |                                                                                           |       |
| 17 | Data synthesis     | <a href="#">#15a</a> Describe criteria under which study data will be quantitatively      | 10-11 |
| 18 |                    | synthesised                                                                               |       |
| 19 |                    |                                                                                           |       |
| 20 |                    |                                                                                           |       |
| 21 | Data synthesis     | <a href="#">#15b</a> If data are appropriate for quantitative synthesis, describe planned | 10-11 |
| 22 |                    | summary measures, methods of handling data and methods of                                 |       |
| 23 |                    | combining data from studies, including any planned exploration of                         |       |
| 24 |                    | consistency (such as I <sup>2</sup> , Kendall's $\tau$ )                                  |       |
| 25 |                    |                                                                                           |       |
| 26 |                    |                                                                                           |       |
| 27 |                    |                                                                                           |       |
| 28 | Data synthesis     | <a href="#">#15c</a> Describe any proposed additional analyses (such as sensitivity or    | 10-11 |
| 29 |                    | subgroup analyses, meta-regression)                                                       |       |
| 30 |                    |                                                                                           |       |
| 31 | Data synthesis     | <a href="#">#15d</a> If quantitative synthesis is not appropriate, describe the type of   | 10-11 |
| 32 |                    | summary planned                                                                           |       |
| 33 |                    |                                                                                           |       |
| 34 |                    |                                                                                           |       |
| 35 | Meta-bias(es)      | <a href="#">#16</a> Specify any planned assessment of meta-bias(es) (such as publication  | 10-11 |
| 36 |                    | bias across studies, selective reporting within studies)                                  |       |
| 37 |                    |                                                                                           |       |
| 38 |                    |                                                                                           |       |
| 39 | Confidence in      | <a href="#">#17</a> Describe how the strength of the body of evidence will be assessed    | 11    |
| 40 | cumulative         | (such as GRADE)                                                                           |       |
| 41 | evidence           |                                                                                           |       |
| 42 |                    |                                                                                           |       |
| 43 |                    |                                                                                           |       |

The PRISMA-P checklist is distributed under the terms of the Creative Commons Attribution License CC-BY 4.0. This checklist was completed on 26. September 2019 using <https://www.goodreports.org/>, a tool made by the [EQUATOR Network](#) in collaboration with [Penelope.ai](#)

# BMJ Open

**Do insomnia and/or sleep disturbances predict the onset, relapse or worsening of depression in community and clinical samples of children and youth? Protocol for a systematic review and meta-analysis.**

|                                 |                                                                                                                                                                                                                                                                                                                                                                                                                                                                    |
|---------------------------------|--------------------------------------------------------------------------------------------------------------------------------------------------------------------------------------------------------------------------------------------------------------------------------------------------------------------------------------------------------------------------------------------------------------------------------------------------------------------|
| Journal:                        | <i>BMJ Open</i>                                                                                                                                                                                                                                                                                                                                                                                                                                                    |
| Manuscript ID                   | bmjopen-2019-034606.R2                                                                                                                                                                                                                                                                                                                                                                                                                                             |
| Article Type:                   | Protocol                                                                                                                                                                                                                                                                                                                                                                                                                                                           |
| Date Submitted by the Author:   | 13-Jul-2020                                                                                                                                                                                                                                                                                                                                                                                                                                                        |
| Complete List of Authors:       | marino, cecilia; Centre for Addiction and Mental Health, Andrade, Brendan; University of Toronto Department of Psychiatry, Aitken, Madison; Centre for Addiction and Mental Health Bonato, Sarah; Centre for Addiction and Mental Health Centre for Addiction and Mental Health, Library Services Haltigan, John; Centre for Addiction and Mental Health Wang, Wei; Centre for Addiction and Mental Health Szatmari, Peter; Centre for Addiction and Mental Health |
| <b>Primary Subject Heading</b>: | Mental health                                                                                                                                                                                                                                                                                                                                                                                                                                                      |
| Secondary Subject Heading:      | Mental health                                                                                                                                                                                                                                                                                                                                                                                                                                                      |
| Keywords:                       | SLEEP MEDICINE, Depression & mood disorders < PSYCHIATRY, Child & adolescent psychiatry < PSYCHIATRY, longitudinal studies, systematic review                                                                                                                                                                                                                                                                                                                      |
|                                 |                                                                                                                                                                                                                                                                                                                                                                                                                                                                    |

SCHOLARONE™  
Manuscripts

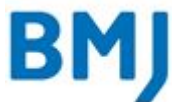

I, the Submitting Author has the right to grant and does grant on behalf of all authors of the Work (as defined in the below author licence), an exclusive licence and/or a non-exclusive licence for contributions from authors who are: i) UK Crown employees; ii) where BMJ has agreed a CC-BY licence shall apply, and/or iii) in accordance with the terms applicable for US Federal Government officers or employees acting as part of their official duties; on a worldwide, perpetual, irrevocable, royalty-free basis to BMJ Publishing Group Ltd ("BMJ") its licensees and where the relevant Journal is co-owned by BMJ to the co-owners of the Journal, to publish the Work in this journal and any other BMJ products and to exploit all rights, as set out in our [licence](#).

The Submitting Author accepts and understands that any supply made under these terms is made by BMJ to the Submitting Author unless you are acting as an employee on behalf of your employer or a postgraduate student of an affiliated institution which is paying any applicable article publishing charge ("APC") for Open Access articles. Where the Submitting Author wishes to make the Work available on an Open Access basis (and intends to pay the relevant APC), the terms of reuse of such Open Access shall be governed by a Creative Commons licence – details of these licences and which [Creative Commons](#) licence will apply to this Work are set out in our licence referred to above.

Other than as permitted in any relevant BMJ Author's Self Archiving Policies, I confirm this Work has not been accepted for publication elsewhere, is not being considered for publication elsewhere and does not duplicate material already published. I confirm all authors consent to publication of this Work and authorise the granting of this licence.

1  
2  
3 Do insomnia and/or sleep disturbances predict the onset, relapse or worsening of depression in community  
4 and clinical samples of children and youth? Protocol for a systematic review and meta-analysis.  
5  
6  
7

8 Cecilia Marino<sup>1,2</sup>, Brendan Andrade<sup>1,2</sup>, Madison Aitken,<sup>1,2</sup> Sarah Bonato<sup>1</sup>, John Haltigan<sup>1,2</sup>, Wei Wang<sup>1,2</sup> and  
9 Peter Szatmari<sup>1,2,3</sup>  
10

11  
12 <sup>1</sup> Cundill Centre for Child and Youth Depression, Center for Addiction and Mental Health, Toronto, Canada

13  
14 <sup>2</sup> Department of Psychiatry, University of Toronto, Toronto, Canada

15  
16 <sup>3</sup> Hospital for Sick Children, Toronto, Ontario, Canada  
17

18 Corresponding author: Cecilia Marino, Centre for Addiction and Mental Health (CAMH), 80 Workman Way,  
19 Room 1236, Toronto, ON M6J 1H4, e-mail: [cecilia.marino@utoronto.ca](mailto:cecilia.marino@utoronto.ca), Tel: 416-535-8501 Ext. 35134  
20

21  
22 Brendan Andrade, [Brendan.Andrade@camh.ca](mailto:Brendan.Andrade@camh.ca)  
23

24 Madison Aitken, [Madison.Aitken@camh.ca](mailto:Madison.Aitken@camh.ca)  
25

26 Sarah Bonato, [Sarah.Bonato@camh.ca](mailto:Sarah.Bonato@camh.ca)  
27

28 John Haltigan, [John.Haltigan@camh.ca](mailto:John.Haltigan@camh.ca)  
29

30 Wei Wang, [Wei.Wang@camh.ca](mailto:Wei.Wang@camh.ca)  
31

32 Peter Szatmari, [peter.szatmari@utoronto.ca](mailto:peter.szatmari@utoronto.ca)  
33  
34  
35  
36  
37  
38

## 39 Abstract

### 40 Introduction

41  
42 Disturbed sleep represents a potentially important modifiable risk factor for the development of depression  
43 in children and youth. This protocol for a systematic review proposes to investigate whether insomnia  
44 and/or sleep disturbances predict child and youth depression in community and clinical-based samples.  
45  
46  
47  
48

### 49 Methods and analysis

50  
51 The protocol adheres to the Preferred Reporting Items for Systematic Review and Meta-Analysis protocols  
52 (PRISMA-P) guidelines. English-written, longitudinal studies that quantitatively estimated the prediction of  
53 depression by insomnia and/or sleep disturbances in individuals 5-24 years of age will be included.  
54  
55 EMBASE, MEDLINE, PsychINFO, Scopus and Web of Science and grey literature will be searched from  
56 1980 to the present. For the selection of studies, two reviewers will be involved. Data extraction will be  
57 conducted by one author and checked independently by a second author. Risk of bias will be appraised  
58  
59  
60



1  
2  
3 using the Research Triangle Institute Item Bank (RTI-IB) tool. Heterogeneity will be measured using the  $I^2$   
4  
5 statistic. Meta-analysis will be carried out if  $\geq 3$  results are available and if outcome measures can be  
6  
7 pooled. The choice between a random-effect or fixed-effect model will be based both on the  $I^2$  statistics and  
8  
9 the participant and study characteristics of the combined studies. Results of the meta-analyses will be  
10  
11 summarized by a forest plot. Analyses will be performed in subgroups stratified by key variables defined  
12  
13 depending on the amount and type of information retrieved.

14  
15 A narrative synthesis will be conducted in place of the meta-analysis, should pooling of data not be  
16  
17 possible. Quality of evidence will be rated using the Grading of Recommendations Assessment,  
18  
19 Development, and Evaluation (GRADE) guidelines.

20  
21 As this is a protocol for systematic review and meta-analysis of published data, ethics review and approval  
22  
23 are not required. The findings will be published in a peer-reviewed journal and disseminated at scientific  
24  
25 conferences and to patient advocacy organizations.

#### 26 27 28 29 30 Strengths and limitations of this study

- 31  
32 • This is a protocol for a systematic review and meta-analysis of existing prospective, longitudinal  
33  
34 evidence on insomnia and/or sleep disturbances predicting depression in children and youth.
  - 35  
36 • This protocol will adhere to the Preferred Reporting Items for Systematic review and Meta-Analysis  
37  
38 protocols (PRISMA-P) guidelines
  - 39  
40 • This protocol is registered at PROSPERO, the international prospective register of systematic  
41  
42 reviews
  - 43  
44 • Full-text screening and extraction will be performed by two reviewers. Any uncertainty regarding  
45  
46 selection will be resolved by consensus and if necessary, by a third reviewer.
  - 47  
48 • With regards to limitations, the review will not include treatment studies and will include only  
49  
50 English-written articles. We include individuals aged 5-24 years, therefore excluding studies on  
51  
52 child and youth disturbed sleep predicting depression at later stages of life.
- 53  
54  
55  
56  
57  
58

59 Trial registration number: International Prospective Register for Systematic Reviews (PROSPERO)  
60 registration number CRD42019136729.

## Introduction

A recent epidemiological study analyzing data from the 2016 National Survey of Children's Health reports prevalence estimates of depression of 1.7% and 6.1% in 6-11 and 12-17 years age-ranges, respectively.<sup>1</sup>

The incidence of depression peaks at 20 years of age<sup>2</sup> with disrupting effects on normative developmental trajectories. Prevalence is equal for both sexes prior to puberty, then it is higher in females.<sup>3</sup> Treatment shows limited efficacy,<sup>4-6</sup> suggesting that prevention may be a more effective resource to reduce the incidence of depression.

Targeting modifiable risk factors of illnesses is becoming a relevant therapeutic strategy for disease prevention.<sup>7</sup> Among modifiable risk factors predicting child and youth depression, insomnia is increasingly recognized as an important component of the complex and multi-factorial causal pathway of depression.<sup>8</sup>

Treating insomnia to specifically reduce the incidence and/or severity of depression has been the focus of controlled, high quality, randomized treatment studies in depressed or at risk for depression adult or elderly individuals.<sup>9-10</sup> In a recent meta-analysis, internet-based cognitive behavioural therapy (CBT) for insomnia had a significant, small effect on comorbid depression in individuals older than 18 years.<sup>11</sup>

Similar evidence in younger individuals is scarce, mostly consists of studies with small sample size/no follow-up, and it is limited to individuals older than 12 years of age<sup>12-18</sup>.

In a randomized controlled trial, CBT for insomnia for six weekly sessions and a booster session after 2 months was significantly more effective in decreasing comorbid depression compared to waitlist in 12-19-year-old individuals with DSM-5 insomnia and no comorbid psychiatric disorders. The effect was large, was maintained after 12 months, and was fully mediated by the reduction of insomnia symptoms.<sup>17</sup>

In a longitudinal, randomised controlled trial study (SENSE, i.e. Sleep and Education: learning New Skills Early) the preventative effect on the incidence of depression in at risk for depression, 12-17-year-old adolescents with sleeping difficulties is investigated.<sup>13</sup> The interventions consist of seven weekly sessions of either a CBT/mindfulness-based sleep intervention or an active control intervention, followed by two booster sessions after three and six months post-intervention. One-hundred-twenty-three participants have completed the interventions,<sup>14-15</sup> however findings regarding the main outcomes of the study (preventative effects of depression) from the two-year follow-up are not available yet.

It is currently not known whether treating sleep problems in depressed or at risk for depression children (e.g. children with history of abuse, with high emotional dysregulation, offspring of depressed parents)

1  
2  
3 would lead to a reduction or lower incidence of depression, respectively, than it would be if sleep problems  
4 were not treated.<sup>19</sup> To understand whether earlier prevention efforts could be more effective, a precise  
5 quantitative estimate of the prediction of depression by insomnia in the entire developmental population,  
6 including depressed and non-depressed individuals, is needed.  
7  
8  
9

10  
11 Insomnia consists of clinically significant long sleep-onset latency and/or awakening after sleep onset  
12 and/or early-morning awakening, accompanied by diurnal tiredness and functional impairment. Prevalence  
13 of insomnia is 19.5% in children, equally distributed among boys and girls; in youth, prevalence is 17.4%,  
14 and higher among girls.<sup>20</sup>  
15  
16  
17

18  
19 Six systematic reviews have summarized cohort studies on insomnia predicting depression.<sup>21-25</sup> Pooled  
20 estimates are consistent across reviews ranging 2.10 (95% CI= 1.86-2.38)<sup>26</sup>-2.83 (95% CI= 1.55-5.17)<sup>24</sup>,  
21 and across subgroups stratified by the most common confounders, e.g. sex [male: 1.46 (95% CI= 1.13-  
22 1.88)<sup>25</sup>; females: 1.96 (95% CI= 1.05-3.66)<sup>25</sup>], type of ascertainment [sample drawn from a special  
23 population: 2.05 (95% CI= 1.53-2.74)<sup>25</sup>; sample representative of a community or population: 2.34 (95% CI=  
24 1.85-2.96)<sup>25</sup>], and age [individuals of age  $\geq$  60 years: 1.87 (95% CI= 1.47, 2.37)<sup>25</sup>-1.92 (95% CI: 1.61-  
25 2.30)<sup>23</sup>; individuals younger than 60 years of age: 2.50 (95% CI= 1.96, 3.20)<sup>25</sup>].  
26  
27  
28  
29

30  
31 However, only three of the six systematic reviews included participants younger than 18 years,<sup>22 25 26</sup> and a  
32 pooled estimate, i.e. odds ratio= 2.0 (95% CI= 1.5-2.7), was provided by only one of the three reviews.<sup>26</sup>  
33  
34  
35

36  
37 This estimate was based on three studies up to 2010 and included 7404 participants, whose age ranged  
38 between 6 and 16 years.<sup>27-29</sup> In all three studies, depression was defined according to DSM IV, and  
39 insomnia to DSM-IV-TR criteria. The test for heterogeneity for this group did not show a significant index  
40 (Q-value= 0.3; df(Q)=2; p=0.9; and I<sup>2</sup>=0.0). Li et al.<sup>25</sup> updated and used the same selection criteria of  
41 Baglioni et al.<sup>26</sup> and although fifteen new cohort studies were added, no new studies on children and youth  
42 were included. Finally, Pigeon et al.<sup>22</sup> summarized studies published from 2014 to 2017; four studies on  
43 children and youth were included, of which three supported insomnia predicting depression,<sup>30-32</sup> and one  
44 found no such association.<sup>33</sup> All three systematic reviews of this age group excluded studies which did not  
45 control for baseline depression. This led to a greatly reduced number of studies. While the rationale of this  
46 choice is clear for studies of risk and prediction, it might not have been the ideal choice, due to the overall  
47 paucity of studies in the child and youth age-range compared to other age groups. Including studies that did  
48 not control for baseline depression would allow testing of whether there are significant differences in the  
49 meta-analytic estimates between studies controlling versus not-controlling for this variable. If no differences  
50  
51  
52  
53  
54  
55  
56  
57  
58  
59  
60

1  
2  
3 are found, studies not controlling for baseline depression could contribute to the pooled data with an overall  
4 increase of the precision for the estimate of the meta-analytic effects.  
5

6  
7 There is also some evidence available on whether sleep disturbances other than insomnia predicts child  
8 and youth depression.<sup>34-43</sup> This may include increased/short/disrupted sleep duration with/without diurnal  
9 sleepiness, sleepwalking/talking, nightmares, bedwetting, breathing-related sleep disorders, and/or  
10 circadian disturbances. Furthermore, sleep disturbances more broadly defined may include challenges  
11 either generically defined with regards to duration and consistency over time, measured by self-reported  
12 questionnaires, interview or by EEG/actigraph-based measures, and scored by either single-item or  
13 cumulative scores. A recent meta-analysis summarized studies testing the association of broadly defined  
14 sleep disturbances on depression in 12-20-year-old already clinically depressed participants. In all selected  
15 studies,<sup>44-50</sup> sleep was defined by EEG-based, objective measures. Estimates of the meta-analytic effects  
16 identified that EEG-based longer sleep onset latency, more wake after sleep onset and lower sleep efficiency  
17 were significant predictors of depression compared to typical sleep (effect sizes ranging .43-.58).<sup>51</sup>  
18

19  
20 Although findings from this review are of crucial importance for potential secondary prevention programs in  
21 depressed youth, it would be useful to have summarized data on the longitudinal association of broadly  
22 defined sleep disturbances with depression on the entire developmental population, including non-clinical  
23 individuals as well as a broader age range, which would allow to apply findings to primary prevention and/or  
24 early intervention programs.  
25

26  
27 Finally, insomnia and/or sleep disturbances are often associated to comorbid psychiatric and medical  
28 conditions.<sup>19</sup> Most previous knowledge synthesis studies have excluded comorbidities, limiting the  
29 generalizability and transferability of findings. For this reason, in this systematic review studies focusing on  
30 both primary and comorbid insomnia and/or sleep disturbances will be included. To understand the extent  
31 to which insomnia and/or sleep disturbances have a distinct risk to depression across comorbid disorders,  
32 subgroup analyses will be performed.  
33

34  
35 Understanding whether insomnia and/or sleep disturbances significantly increase the risk of depression in  
36 children and youth could lead to variation in clinical practice and inform policy development. Preventive  
37 strategies could include treating sleep problems starting as early as childhood. This is particularly important  
38 in light of evidence on the differential effectiveness of a number of treatment for sleep problems (e.g.  
39 melatonin,<sup>52 53</sup> cognitive behavioural therapy,<sup>54</sup> physical exercise,<sup>55</sup> and bright light therapy<sup>56</sup>) and the fact  
40 that sleep problems in children are under-diagnosed<sup>57</sup> and rarely treated.<sup>58</sup>  
41  
42  
43  
44  
45  
46  
47  
48  
49  
50  
51  
52  
53  
54  
55  
56  
57  
58  
59  
60

1  
2  
3 The purpose of this protocol is to outline methods for a systematic review and meta-analysis of data from  
4 prospective, longitudinal studies of children and youth ascertained from clinical or community-based  
5 samples investigating the role of insomnia and/or sleep disturbances compared to typical sleep as  
6 predictors of depression. “Do children and youth with insomnia and/or sleep disturbance have higher rates  
7 of later depression than children and youth without insomnia and/or sleep disturbance”?  
8  
9  
10  
11

12 We are interested in testing this relationship in the context of both the absence and presence of baseline  
13 depression, i.e. whether insomnia and/or sleep disturbance predict both new and relapse/worsening of  
14 depression, respectively.  
15  
16  
17

18 Our study will add to the currently available knowledge synthesis in that:  
19

- 20 1. It will provide an updated meta-analytic estimate of the effects of insomnia predicting child and  
21 youth depression, adding studies from 2010 onward compared to Baglioni et al.<sup>26</sup>  
22  
23
- 24 2. By including studies on 5-24-year-old participants from both clinical and non-clinical populations, it  
25 will provide a more comprehensive and updated meta-analytic estimate compared to Lovato and  
26 Gradisar<sup>51</sup>  
27  
28
- 29 3. It will include studies on participants with/without baseline depression and whether or not controlling  
30 for baseline depression  
31  
32
- 33 4. It will include studies of both primary and comorbid insomnia and/or sleep disturbances  
34

35 As a secondary aim, we will test whether insomnia and/or sleep disturbance predict new onset and/or  
36 worsening/relapse of depression, by testing the pooled estimate in two subgroups of studies, respectively,  
37 those including participants with baseline depression or where baseline depression has been controlled for,  
38 and studies including participants without baseline depression or where baseline depression has not been  
39 controlled for.  
40  
41  
42  
43  
44

45 Finally, we aim to explore the sources of potential heterogeneity and examine the robustness of the primary  
46 hypothesis against key confounding variables. Specifically, we will address whether the prediction of child  
47 and youth depression by insomnia and/or sleep disturbances significantly differ between studies stratified by  
48 key variables, e.g. risk of bias score, type of ascertainment, type of sleep disturbance, measurement of  
49 outcome, presence of baseline comorbidity, sample size, age group, gender. Subgroups will be defined  
50 depending on the amount and type of information retrieved.  
51  
52  
53  
54  
55

56 **Methods**  
57  
58  
59  
60

1  
2  
3 For the protocol, we will follow the guidelines outlined in “Preferred Reporting Items for Systematic review  
4 and Meta-Analysis protocols (PRISMA-P)”.<sup>59</sup> For the final report we will follow the guidelines set in “Meta-  
5 analysis Of Observational Studies in Epidemiology: a proposal for reporting” (MOOSE).<sup>60</sup>  
6  
7  
8  
9

10 Patient and Public Involvement: no patient involved  
11  
12  
13

14 Inclusion criteria  
15  
16  
17

### 18 *Study types*

19  
20 This study will include (1) English-written, (2) prospective, longitudinal observational studies that  
21 quantitatively estimated the prediction of depression by insomnia and/or sleep disturbances in children and  
22 youth. Only those studies reporting odds ratio, relative risk, hazard ratio, regression coefficients or  
23 correlation coefficients with their respective measurements of error and p-values will be selected. Grey  
24 literature including relevant dissertations/PhD theses and key conference publications will be included. Case  
25 series, case reports, systematic reviews, meta-analyses, as well as experimental, retrospective, cross-  
26 sectional, treatment, theoretical and position studies will be excluded.  
27  
28  
29  
30  
31  
32  
33  
34

### 35 *Population type*

36  
37 Mean age to determine eligibility for inclusion of the study is between 5-24 years. This age range was  
38 chosen to cover the whole age range of risk for depression in childhood and youth, and to include the period  
39 of peak incidence for depression.<sup>1 2</sup> In our review, we identify three categories: ‘childhood’ between 5 and 9  
40 years of age, ‘adolescence’ between 10 and 19 years of age, and ‘young adulthood’ between 20 and 24  
41 years of age.<sup>61</sup> For simplicity, the term ‘youth’ refers to individuals whose age is between 10 and 24 years.  
42  
43  
44  
45  
46  
47 Studies focusing on participants belonging to either community or clinical based samples with any comorbid  
48 psychiatric/neurological/medical diagnosis will be included.  
49  
50  
51  
52

### 53 *Exposure*

54  
55 Studies will be included if focusing on either one of the following two exposures:

- 56 1. Insomnia, defined as clinically significant difficulty in initiating or maintaining sleep or non-restorative  
57 sleep, as based on DSM III and later versions. Although the criterion of daytime impairment is  
58 required to define clinically significant insomnia, it has been shown that pooled estimates of  
59  
60

1  
2  
3 insomnia predicting depression when this criterion is taken into account<sup>24</sup> is of comparable  
4 magnitude relative to the ones obtained when this criterion is not considered (Baglioni et al. 2011;  
5 Li et al. 2016).<sup>26</sup> Therefore, to allow for inclusion of the highest number of studies, daytime  
6  
7 impairment will be free to vary.  
8  
9

- 10 2. Sleep disturbances, defined as patterns of quality and sleep duration which deviate from expected  
11 age-related norms, i.e. increased/short/fragmented sleep duration with or without daytime  
12 fatigue/sleepiness, nightmares/terror attacks, circadian disturbances, and/or night walking/talking.  
13 Sleep disturbances can be generically defined with regards to duration and consistency over time,  
14 and can be based on subjective and/or EEG/actigraph-based, objective measures. Measures can  
15 be based on single or multiple items, or a cumulative score of various items. To increase the  
16 generalizability of the results, narcolepsy, breathing-related sleep disorders, central sleep apnea,  
17 non-rapid/rapid eye movement sleep disorder, restless legs syndrome, substance/medication-  
18 induced sleep disorder, and enuresis nocturna primaria may also be included.  
19  
20  
21  
22  
23  
24  
25  
26  
27

28 Exposures' assessment can be administered by a clinician, a researcher, or based on self-report, parent-  
29 report, and/or teacher-report questionnaires.  
30  
31  
32

### 33 *Outcome*

34 Studies will be included if they focus on either one of the following outcomes: major depressive disorder,  
35 depressive disorder not otherwise specified, dysthymic disorder, and/or dimensional constructs of  
36 depression, i.e. defined by scores from single- or multiple-item questionnaires, internalizing disorders or  
37 anxious depression. Studies focusing on anxiety without a measure of depression will not be included.  
38 Studies including participants with bipolar disorders will be excluded given that sleep problems' prevalence  
39 differ significantly in bipolar versus unipolar disorders.<sup>47 62</sup> Outcome is measured by standardized and  
40 validated tools administered by a clinician, a researcher, and/or based on self-report, parent-report, and/or  
41 teacher-report questionnaires.  
42  
43  
44  
45  
46  
47  
48  
49  
50

51 To be included, both exposure and outcome have to be measured at mean age  $\geq 5$  years and  $\leq 24$  and the  
52 time between the exposure and outcome is  $\geq$  one month. To address the research question on the role of  
53 insomnia and/or sleep disturbances as predictor of depression, only studies reporting on the exposure  
54 measured at least one month before the outcome will be included. When multiple assessments are  
55 conducted on the same cohort, each pair where both exposures and outcomes are measured at mean age  $\leq$   
56  
57  
58  
59  
60 24 and  $\geq 5$  years and exposures are measured before the outcome will be considered.

### *Confounders*

Studies will be included regardless of whether they contain estimates adjusted for common confounding factors, such as sex, socio-economic status, demographics, type of comorbidity at baseline. Studies that do not control for common confounding factors will be highlighted for potentially confounded results.

### Identification of eligible studies and data extraction

#### *Search strategy*

The following databases will be searched: EMBASE, MEDLINE, PsychINFO, Scopus and Web of Science. A draft of the Medline search strategy will be developed using a combination of MeSH and keywords terms relating to sleep disorders, depression/depressive disorder and children/adolescents/young adults with the help of a research librarian. The search will be limited to the years 1980 (to focus on current diagnostic terminology from the DSM III) to the present and will also be limited to observational studies using the search filter developed by the Scottish Intercollegiate Guidelines Network (SIGN). The draft Medline search will also be piloted to ensure the sensitivity and efficacy of the final search strategy and will also be reviewed by all of the participating authors (figure 1). The finalized Medline search will be adapted for each bibliographic database individually.

Grey literature, i.e. dissertations and conference proceeding/papers, will be included in the search in order to mitigate against publication bias.<sup>63</sup> Dissertations have been noted as providing a valuable methodology and clinical source of information.<sup>64</sup> Additionally, searching for relevant conference proceedings/papers is recommended in order to identify recent, but unpublished research.<sup>65</sup>

The grey literature will be screened for relevant material, including use of the search checklist Grey Matters: "A Practical Search Tool for Evidence-Based Medicine" from the Canadian Agency for Drugs and Technologies in Health (CADTH), and by also searching other sources to identify relevant dissertations/PhD theses and conference publications, i.e. Proquest Dissertations and Theses, ProceedingsFirst, PapersFirst, Conference Abstracts from Embase, Google Scholar Search. The references of selected articles will also be hand-searched for eligible studies and all the searches will be re-run just before the final analyses to identify additional relevant studies. Experts in the field will be contacted to locate potentially eligible studies and/or unpublished data.

#### *Selection of studies*



1  
2  
3 Search results will be exported into Covidence, merged and checked for duplicates. For the selection of  
4 studies two students will be involved, with minimum an undergraduate level of education in a health-related  
5 field and previous experience with the systematic review methodology. They will be given the systematic  
6 review protocol and 5-hour training on the content of the systematic review and basic knowledge of the  
7 procedure. For the selection of studies based on title&abstract screening, eligible studies will be selected by  
8 two reviewers until a kappa score of 0.8 is achieved with the remainder being selected by one reviewer. Full  
9 text papers will be obtained for all references thought potentially eligible by a single reviewer based on  
10 title&abstract; all full text papers will be reviewed by two independent reviewers, with disagreements referred  
11 to a third, senior-author reviewer. The PRISMA search flow chart will be used to report the number of studies  
12 included and excluded at each step in the process, along with the rationale for the exclusion.  
13  
14  
15  
16  
17  
18  
19  
20  
21  
22  
23  
24  
25

#### 26 *Data extraction*

27  
28 Data extraction will be conducted by one author and checked independently by a second author using a pre-  
29 defined data extraction form. Extracted variables will pertain to the following domains: general study  
30 information, study characteristics (i.e. year of publication, type of sample ascertainment, sample size),  
31 participant characteristics (i.e. age at baseline, age at follow up, number of follow up, interval between  
32 baseline and each follow-up, exposure and outcome definition and diagnostic tool, covariates that were  
33 adjusted in the analyses). Outcome data will include odds ratio, relative risk, hazard ratio, regression  
34 coefficients or correlation coefficients with their respective measurements of error and p-values. Information  
35 on the sources of funding for each study will be retrieved. Discrepancies between the two authors will be  
36 resolved by discussion with a third, senior-author reviewer. When relevant data are missing, corresponding  
37 authors will be contacted to obtain the information.  
38  
39  
40  
41  
42  
43  
44  
45  
46  
47  
48

#### 49 Risk of bias assessment

50  
51 Risk of bias of included studies' results will be appraised using the Research Triangle Institute Item Bank  
52 (RTI-IB) tool. The RTI-B is a practical, quality-scoring tool for observational studies with a focus on bias and  
53 precision.<sup>66</sup> It has a high inter-rater reliability (75%) and consists of 29 items tapping 12 domains (1)  
54 background, (2) sample definition and selection, (3) interventions/exposure, (4) outcomes, (5) creation of  
55 treatment groups, (6) blinding, (7) soundness of information, (8) follow-up, (9) analysis comparability, (10)  
56 analysis outcome, (11) interpretation, and (12) presentation and reporting. Possible response categories to  
57  
58  
59  
60

1  
2  
3 each item are 'yes', 'no', 'partially', 'cannot determine', and 'not applicable'. The quality appraisal will be  
4 performed by two authors independently with discrepancies being resolved by discussion with a third, senior-  
5 author reviewer. Results will be reported narratively and summarized in a descriptive table. Items will be  
6 subdivided into six categories: selection bias/confounding, performance bias, attrition bias, detection bias,  
7 reporting bias, and information bias. Items are scored as high, low, or unclear risk of bias. If at least one item  
8 in a category is scored as high, the risk of bias within this category is scored as moderate risk. If at least 50%  
9 of the items in a category are scored as high, the risk of the category is scored as high. Each study will  
10 receive a summary score that corresponds to the highest score obtained in any category.<sup>66</sup>  
11  
12  
13  
14  
15  
16  
17  
18  
19

### 20 *Description of primary studies and data analysis*

21  
22 Data will be synthesized by a table reporting study type, participant characteristics, exposure and outcome  
23 measures, and a second table on the risk of bias assessment. Studies will be combined based on  
24 similarities across relevant characteristics, e.g. type of sample ascertainment, age at baseline, duration of  
25 follow-up, exposure and outcome definition and diagnostic tool, and meta-analysis will be performed if  $\geq 3$   
26 studies are available. Heterogeneity of pooled estimates will be measured using the  $I^2$  statistic, which  
27 represents the percentage of variation attributable to between-study heterogeneity.  $I^2$  values of 25%, 50%,  
28 and 75% will be considered as low, medium, and high heterogeneity, respectively.<sup>67</sup> For the meta-analysis,  
29 the choice between a random-effect or fixed-effect model will be based both on the  $I^2$  statistics, and the  
30 participant and study characteristics of the combined studies. Results of the meta-analyses will be  
31 summarized by a forest plot. Meta-analysis and test of heterogeneity will be performed using STATA 14  
32 (StataCorp. 2015. Stata Statistical Software: Release 14. College Station, TX: StataCorp LP). A narrative  
33 synthesis will be conducted in place of the meta-analysis, should this latter cannot be performed. To test  
34 the robustness of the primary hypothesis against study-level characteristics, e.g. risk-of-bias score, sample  
35 size, year of publication, duration of follow up, exposure and outcome definition and diagnostic tool,  
36 sensitivity analyses will be performed by excluding those studies with the characteristic that can potentially  
37 be a source of heterogeneity, e.g. excluding studies with a high risk-of-bias score. Likewise, a sensitivity  
38 analysis will be performed by removing studies focusing on medically based sleep disorders, i.e.  
39 narcolepsy, breathing-related sleep disorders, central sleep apnea, non-rapid/rapid eye movement sleep  
40 disorder, restless legs syndrome, substance/medication-induced sleep disorder, and enuresis nocturna  
41 primaria, to prevent the possibility that the pooled estimates could be impacted by factors related to the  
42 chronicity of these conditions.  
43  
44  
45  
46  
47  
48  
49  
50  
51  
52  
53  
54  
55  
56  
57  
58  
59  
60

1  
2  
3 Subgroup analyses will be performed related to relevant participant-level characteristics, e.g. baseline  
4 comorbidity, age at baseline, gender, by calculating pooled estimates in subgroups of studies, e.g. studies  
5 of children versus adolescents versus young adults, and/or taking different estimates from the same study  
6 related to the subgroups of interest, e.g. male versus female. Subgroups will be defined depending on the  
7 amount and type of information retrieved.  
8  
9

10  
11  
12 To assess sensitivity of the pooled estimate to each included study, we will apply the leave-one-out  
13 method, which consists of repeating the analysis removing one study at a time.<sup>68</sup> Potential publication bias  
14 and other source of bias will be further assessed by visual inspection of the symmetry of funnel plots.  
15  
16

17  
18 Quality of evidence will be rated using the Grading of Recommendations Assessment, Development, and  
19 Evaluation (GRADE) guidelines taking into account risk of bias, applying the RTI-IB tool; heterogeneity;  
20 directness, evaluating the relevance of the sample, the outcomes and the exposure; precision, examining  
21 the 95% confidence interval; and publication bias of the included studies. We will assess inter-rater  
22 agreement between investigators for study inclusion, data extraction, and methodological quality  
23 assessment using Kappa Cohen's coefficient.  
24  
25  
26  
27  
28  
29  
30  
31

## 32 Discussion

33 This systematic review and meta-analysis will synthesize and quantify the existing evidence on insomnia  
34 and/or sleep disturbances predicting depression in children and youth.  
35  
36

37 Understanding the magnitude of the risk of sleep problems predicting later depression in children and youth  
38 will contribute significantly to the development of treatment and secondary prevention strategies of  
39 depression.<sup>5 6 69</sup> Sleep is often impaired in child and youth depression.<sup>70</sup> Treating sleep problems in  
40 childhood can become an adjunctive tool to treat more effectively childhood depression but also to change  
41 the risk trajectories of depression, reducing the incidence and severity of depressive episodes later in life.  
42  
43  
44  
45  
46

47 This study will also potentially inform strategies for primary prevention of depression in healthy children and  
48 youth. Sleep patterns physiologically change from birth to early adulthood as a consequence of a number of  
49 maturational changes in the brain, and as a result of an adjustment to the social environment.<sup>71 72</sup> The most  
50 evident change concerns the duration of sleep, which decreases from approximately 14 hours at 6 months  
51 of age to 8 hours at 16 years of age.<sup>73 74</sup> Another relevant maturational change concerns the sleep-onset  
52 time, which delays up to approximately 2 hours when transitioning to adolescence.<sup>75</sup> This process is typical  
53 of puberty, and it is part of the phase delay of a host of circadian rhythms related to gonadal hormones'  
54 changes.<sup>75</sup> The delay in sleep-onset time, called evening chronotype, manifests at a younger age in  
55  
56  
57  
58  
59  
60

1  
2  
3 females than males, corresponding to the sex difference in the onset of puberty.<sup>72 75</sup> Evidence shows that  
4 over the last century child and youth sleep has consistently reduced beyond normative maturational  
5 changes.<sup>76 77</sup> It has been claimed that this “epidemic” shortage of sleep might be related to the concomitant  
6 occurrence of the evening chronotype and earlier morning wake-up time of youth compared to younger  
7 children.<sup>78</sup> Other studies claim that decreased sleep in children and youth may instead be due to the  
8 increase of electronic screen media use during late hours.<sup>79</sup> As a result, an increasing proportion of  
9 otherwise healthy children and youth is exposed to insufficient sleep. An open question is whether this  
10 newly occurring, sleep-deprived child and youth cohort is at risk of depression. Understanding if the same  
11 risk pathway identified in affected or at-risk for depression individuals exists also in typically developing  
12 children and youth is essential to understand the size and potential consequences of the secular trend  
13 toward insufficient sleep and to eventually plan effective programs of primary prevention to reduce the  
14 incidence of depression. An open question is whether this  
15 newly occurring, sleep-deprived child and youth cohort is at risk of depression. Understanding if the same  
16 risk pathway identified in affected or at-risk for depression individuals exists also in typically developing  
17 children and youth is essential to understand the size and potential consequences of the secular trend  
18 toward insufficient sleep and to eventually plan effective programs of primary prevention to reduce the  
19 incidence of depression.

20  
21  
22  
23  
24  
25  
26  
27  
28 Ethics and dissemination: As this is a protocol for systematic review and meta-analysis of published data,  
29 ethics review and approval are not required. The findings will be published in a peer-reviewed journal and  
30 disseminated at scientific conferences.

31  
32  
33 Author contributions: CM, BA, MA and PS conceived the idea, planned and designed the study protocol.  
34 CM wrote the first draft. SB provided expertise to the search strategy. WW provided expertise to the data  
35 extraction and statistical analysis. JH provided critical insights. All authors have approved and contributed  
36 to the final written manuscript. CM guarantor of the review.

37  
38  
39  
40  
41 Funding statement: The author(s) acknowledge the support of the Cundill Centre for Child and Youth  
42 Depression at the Centre for Addiction and Mental Health (CAMH). The views and opinions expressed in  
43 this article are those of the author(s) and do not necessarily reflect those of CAMH. Funder’s roles consist  
44 of evaluating and funding the grant application if suitable, monitoring and evaluating research outputs,  
45 facilitating the implementation of findings in health care, the interaction between researchers and research  
46 users, and the dissemination research findings. Since our project was donor funded, there is no  
47 award/grant number.

48  
49  
50  
51 Competing interests statement. None declared.

52  
53  
54  
55 Word Count: 4,130 words.

56  
57  
58  
59  
60 Patients or the public WERE NOT involved in the design, or conduct, or reporting, or dissemination of our  
research

1  
2  
3  
4  
5  
6  
7  
8  
9  
10  
11  
12  
13  
14  
15  
16  
17  
18  
19  
20  
21  
22  
23  
24  
25  
26  
27  
28  
29  
30  
31  
32  
33  
34  
35  
36  
37  
38  
39  
40  
41  
42  
43  
44  
45  
46  
47  
48  
49  
50  
51  
52  
53  
54  
55  
56  
57  
58  
59  
60

For peer review only

1  
2  
3 Figure 1: Database: Ovid MEDLINE: Epub Ahead of Print, In-Process & Other Non-Indexed Citations, Ovid  
4 MEDLINE® Daily and Ovid MEDLINE® <1946-Present>  
5  
6  
7 Search Strategy  
8  
9  
10  
11  
12  
13  
14  
15  
16  
17  
18  
19  
20  
21  
22  
23  
24  
25  
26  
27  
28  
29  
30  
31  
32  
33  
34  
35  
36  
37  
38  
39  
40  
41  
42  
43  
44  
45  
46  
47  
48  
49  
50  
51  
52  
53  
54  
55  
56  
57  
58  
59  
60

For peer review only

## References

1. Ghandour RM, Sherman LJ, Vladutiu CJ, et al. Prevalence and Treatment of Depression, Anxiety, and Conduct Problems in US Children. *J Pediatr* 2019;206:256-67 e3. doi: 10.1016/j.jpeds.2018.09.021 [published Online First: 2018/10/17]
2. Avenevoli S, Swendsen J, He JP, et al. Major depression in the national comorbidity survey-adolescent supplement: prevalence, correlates, and treatment. *J Am Acad Child Adolesc Psychiatry* 2015;54(1):37-44 e2. doi: 10.1016/j.jaac.2014.10.010 [published Online First: 2014/12/20]
3. Park RJ, Goodyer IM. Clinical guidelines for depressive disorders in childhood and adolescence. *Eur Child Adolesc Psychiatry* 2000;9(3):147-61. [published Online First: 2000/11/30]
4. Cipriani A, Zhou X, Del Giovane C, et al. Comparative efficacy and tolerability of antidepressants for major depressive disorder in children and adolescents: a network meta-analysis. *Lancet* 2016;388(10047):881-90. doi: 10.1016/S0140-6736(16)30385-3 [published Online First: 2016/06/13]
5. Eckshtain D, Kuppens S, Ugueto A, et al. Meta-Analysis: 13-Year Follow-up of Psychotherapy Effects on Youth Depression. *J Am Acad Child Adolesc Psychiatry* 2019 doi: 10.1016/j.jaac.2019.04.002 [published Online First: 2019/04/21]
6. Weisz JR, Kuppens S, Ng MY, et al. Are Psychotherapies for Young People Growing Stronger? Tracking Trends Over Time for Youth Anxiety, Depression, Attention-Deficit/Hyperactivity Disorder, and Conduct Problems. *Perspect Psychol Sci* 2019;14(2):216-37. doi: 10.1177/1745691618805436 [published Online First: 2018/12/21]
7. Gapstur SM, Drope JM, Jacobs EJ, et al. A blueprint for the primary prevention of cancer: Targeting established, modifiable risk factors. *CA Cancer J Clin* 2018;68(6):446-70. doi: 10.3322/caac.21496 [published Online First: 2018/10/12]
8. Cairns KE, Yap MB, Pilkington PD, et al. Risk and protective factors for depression that adolescents can modify: a systematic review and meta-analysis of longitudinal studies. *J Affect Disord* 2014;169:61-75. doi: 10.1016/j.jad.2014.08.006 [published Online First: 2014/08/27]
9. Christensen H, Batterham PJ, Gosling JA, et al. Effectiveness of an online insomnia program (SHUTi) for prevention of depressive episodes (the GoodNight Study): a randomised controlled trial. *Lancet Psychiatry* 2016;3(4):333-41. doi: 10.1016/S2215-0366(15)00536-2 [published Online First: 2016/02/02]

- 1  
2  
3 10. Freeman D, Sheaves B, Goodwin GM, et al. The effects of improving sleep on mental health (OASIS): a  
4  
5 randomised controlled trial with mediation analysis. *Lancet Psychiatry* 2017;4(10):749-58. doi:  
6  
7 10.1016/S2215-0366(17)30328-0 [published Online First: 2017/09/11]  
8
- 9 11. Ye YY, Zhang YF, Chen J, et al. Internet-Based Cognitive Behavioral Therapy for Insomnia (ICBT-i)  
10  
11 Improves Comorbid Anxiety and Depression-A Meta-Analysis of Randomized Controlled Trials.  
12  
13 *PLoS One* 2015;10(11):e0142258. doi: 10.1371/journal.pone.0142258 [published Online First:  
14  
15 2015/11/19]
- 16 12. Werner-Seidler A, Wong Q, Johnston L, et al. Pilot evaluation of the Sleep Ninja: a smartphone  
17  
18 application for adolescent insomnia symptoms. *BMJ open* 2019;9(5):e026502. doi:  
19  
20 10.1136/bmjopen-2018-026502 [published Online First: 2019/05/28]  
21
- 22 13. Waloszek JM, Schwartz O, Simmons JG, et al. The SENSE Study (Sleep and Education: learning New  
23  
24 Skills Early): a community cognitive-behavioural therapy and mindfulness-based sleep intervention  
25  
26 to prevent depression and improve cardiac health in adolescence. *BMC Psychol* 2015;3:39. doi:  
27  
28 10.1186/s40359-015-0096-x  
29
- 30 14. Blake M, Waloszek JM, Schwartz O, et al. The SENSE study: Post intervention effects of a randomized  
31  
32 controlled trial of a cognitive-behavioral and mindfulness-based group sleep improvement  
33  
34 intervention among at-risk adolescents. *J Consult Clin Psychol* 2016;84(12):1039-51. doi:  
35  
36 10.1037/ccp0000142  
37
- 38 15. Blake M, Schwartz O, Waloszek JM, et al. The SENSE Study: Treatment Mechanisms of a Cognitive  
39  
40 Behavioral and Mindfulness-Based Group Sleep Improvement Intervention for At-Risk Adolescents.  
41  
42 *Sleep* 2017;40(6) doi: 10.1093/sleep/zsx061  
43
- 44 16. Kirschbaum-Lesch I, Gest S, Legenbauer T, et al. Feasibility and Efficacy of Bright Light Therapy in  
45  
46 Depressed Adolescent Inpatients. *Zeitschrift fur Kinder- und Jugendpsychiatrie und Psychotherapie*  
47  
48 2018;46(5):423-29. doi: 10.1024/1422-4917/a000603 [published Online First: 2018/07/18]  
49
- 50 17. de Bruin EJ, Bogels SM, Oort FJ, et al. Improvements of adolescent psychopathology after insomnia  
51  
52 treatment: results from a randomized controlled trial over 1 year. *Journal of child psychology and*  
53  
54 *psychiatry, and allied disciplines* 2018;59(5):509-22. doi: 10.1111/jcpp.12834 [published Online First:  
55  
56 2017/10/21]
- 57 18. Dewald-Kaufmann JF, Oort FJ, Meijer AM. The effects of sleep extension and sleep hygiene advice on  
58  
59 sleep and depressive symptoms in adolescents: a randomized controlled trial. *Journal of child*  
60



1  
2  
3  
4  
5  
6  
7  
8  
9  
10  
11  
12  
13  
14  
15  
16  
17  
18  
19  
20  
21  
22  
23  
24  
25  
26  
27  
28  
29  
30  
31  
32  
33  
34  
35  
36  
37  
38  
39  
40  
41  
42  
43  
44  
45  
46  
47  
48  
49  
50  
51  
52  
53  
54  
55  
56  
57  
58  
59  
60

*psychology and psychiatry, and allied disciplines* 2014;55(3):273-83. doi: 10.1111/jcpp.12157

[published Online First: 2013/11/21]

19. Fang H, Tu S, Sheng J, et al. Depression in sleep disturbance: A review on a bidirectional relationship,

mechanisms and treatment. *J Cell Mol Med* 2019;23(4):2324-32. doi: 10.1111/jcmm.14170

[published Online First: 2019/02/09]

20. Barclay NL, Gehrman PR, Gregory AM, et al. The heritability of insomnia progression during

childhood/adolescence: results from a longitudinal twin study. *Sleep* 2015;38(1):109-18. doi:

10.5665/sleep.4334 [published Online First: 2014/10/18]

21. Cole MG, Dendukuri N. Risk factors for depression among elderly community subjects: a systematic

review and meta-analysis. *Am J Psychiatry* 2003;160(6):1147-56. doi: 10.1176/appi.ajp.160.6.1147

[published Online First: 2003/06/05]

22. Pigeon WR, Bishop TM, Krueger KM. Insomnia as a Precipitating Factor in New Onset Mental Illness: a

Systematic Review of Recent Findings. *Curr Psychiatry Rep* 2017;19(8):44. doi: 10.1007/s11920-

017-0802-x [published Online First: 2017/06/16]

23. Bao YP, Han Y, Ma J, et al. Cooccurrence and bidirectional prediction of sleep disturbances and

depression in older adults: Meta-analysis and systematic review. *Neurosci Biobehav Rev*

2017;75:257-73. doi: 10.1016/j.neubiorev.2017.01.032 [published Online First: 2017/02/10]

24. Hertenstein E, Feige B, Gmeiner T, et al. Insomnia as a predictor of mental disorders: A systematic

review and meta-analysis. *Sleep Med Rev* 2019;43:96-105. doi: 10.1016/j.smrv.2018.10.006

[published Online First: 2018/12/12]

25. Li L, Wu C, Gan Y, et al. Insomnia and the risk of depression: a meta-analysis of prospective cohort

studies. *BMC Psychiatry* 2016;16(1):375. doi: 10.1186/s12888-016-1075-3 [published Online First:

2016/11/07]

26. Baglioni C, Battagliese G, Feige B, et al. Insomnia as a predictor of depression: a meta-analytic

evaluation of longitudinal epidemiological studies. *J Affect Disord* 2011;135(1-3):10-9. doi:

10.1016/j.jad.2011.01.011 [published Online First: 2011/02/09]

27. Roberts RE, Roberts CR, Chen IG. Impact of insomnia on future functioning of adolescents. *J*

*Psychosom Res* 2002;53(1):561-9. [published Online First: 2002/07/20]

28. Roane BM, Taylor DJ. Adolescent insomnia as a risk factor for early adult depression and substance

abuse. *Sleep* 2008;31(10):1351-6. [published Online First: 2008/10/16]

- 1  
2  
3 29. Johnson EO, Chilcoat HD, Breslau N. Trouble sleeping and anxiety/depression in childhood. *Psychiatry*  
4  
5 *Res* 2000;94(2):93-102. [published Online First: 2000/05/16]  
6  
7 30. Alvaro PK, Roberts RM, Harris JK, et al. The direction of the relationship between symptoms of insomnia  
8  
9 and psychiatric disorders in adolescents. *J Affect Disord* 2017;207:167-74. doi:  
10  
11 10.1016/j.jad.2016.08.032 [published Online First: 2016/10/11]  
12  
13 31. Ritter PS, Hofler M, Wittchen HU, et al. Disturbed sleep as risk factor for the subsequent onset of bipolar  
14  
15 disorder--Data from a 10-year prospective-longitudinal study among adolescents and young adults. *J*  
16  
17 *Psychiatr Res* 2015;68:76-82. doi: 10.1016/j.jpsychires.2015.06.005 [published Online First:  
18  
19 2015/08/01]  
20  
21 32. Hayley AC, Skogen JC, Sivertsen B, et al. Symptoms of Depression and Difficulty Initiating Sleep from  
22  
23 Early Adolescence to Early Adulthood: A Longitudinal Study. *Sleep* 2015;38(10):1599-606. doi:  
24  
25 10.5665/sleep.5056 [published Online First: 2015/07/22]  
26  
27 33. Armstrong JM, Ruttle PL, Klein MH, et al. Associations of child insomnia, sleep movement, and their  
28  
29 persistence with mental health symptoms in childhood and adolescence. *Sleep* 2014;37(5):901-9.  
30  
31 doi: 10.5665/sleep.3656 [published Online First: 2014/05/03]  
32  
33 34. Armitage R, Hoffmann RF, Emslie GJ, et al. Sleep microarchitecture as a predictor of recurrence in  
34  
35 children and adolescents with depression. *Int J Neuropsychopharmacol* 2002;5(3):217-28. doi:  
36  
37 10.1017/S1461145702002948 [published Online First: 2002/10/09]  
38  
39 35. Gregory AM, O'Connor TG. Sleep problems in childhood: a longitudinal study of developmental change  
40  
41 and association with behavioral problems. *J Am Acad Child Adolesc Psychiatry* 2002;41(8):964-71.  
42  
43 doi: 10.1097/00004583-200208000-00015 [published Online First: 2002/08/07]  
44  
45 36. Fredriksen K, Rhodes J, Reddy R, et al. Sleepless in Chicago: tracking the effects of adolescent sleep  
46  
47 loss during the middle school years. *Child Dev* 2004;75(1):84-95. [published Online First:  
48  
49 2004/03/16]  
50  
51 37. Gregory AM, Caspi A, Eley TC, et al. Prospective longitudinal associations between persistent sleep  
52  
53 problems in childhood and anxiety and depression disorders in adulthood. *J Abnorm Child Psychol*  
54  
55 2005;33(2):157-63. [published Online First: 2005/04/21]  
56  
57 38. Gregory AM, Van der Ende J, Willis TA, et al. Parent-reported sleep problems during development and  
58  
59 self-reported anxiety/depression, attention problems, and aggressive behavior later in life. *Arch*  
60  
*Pediatr Adolesc Med* 2008;162(4):330-5. doi: 10.1001/archpedi.162.4.330 [published Online First:  
2008/04/09]

1  
2  
3  
4  
5  
6  
7  
8  
9  
10  
11  
12  
13  
14  
15  
16  
17  
18  
19  
20  
21  
22  
23  
24  
25  
26  
27  
28  
29  
30  
31  
32  
33  
34  
35  
36  
37  
38  
39  
40  
41  
42  
43  
44  
45  
46  
47  
48  
49  
50  
51  
52  
53  
54  
55  
56  
57  
58  
59  
60

39. Gregory AM, Rijdsdijk FV, Lau JY, et al. The direction of longitudinal associations between sleep problems and depression symptoms: a study of twins aged 8 and 10 years. *Sleep* 2009;32(2):189-99. doi: 10.1093/sleep/32.2.189 [published Online First: 2009/02/26]
40. Touchette E, Chollet A, Galera C, et al. Prior sleep problems predict internalising problems later in life. *J Affect Disord* 2012;143(1-3):166-71. doi: 10.1016/j.jad.2012.05.049 [published Online First: 2012/08/04]
41. Greene G, Gregory AM, Fone D, et al. Childhood sleeping difficulties and depression in adulthood: the 1970 British Cohort Study. *J Sleep Res* 2015;24(1):19-23. doi: 10.1111/jsr.12200 [published Online First: 2014/09/03]
42. Wang B, Eastwood PR, Becker A, et al. Concurrent developmental course of sleep problems and emotional/behavioral problems in childhood and adolescence as reflected by the dysregulation profile. *Sleep* 2019;42(3) doi: 10.1093/sleep/zsy243 [published Online First: 2018/12/07]
43. Wang B, Isensee C, Becker A, et al. Developmental Trajectories of Sleep Problems from Childhood to Adolescence Both Predict and Are Predicted by Emotional and Behavioral Problems. *Front Psychol* 2016;7:1874. doi: 10.3389/fpsyg.2016.01874 [published Online First: 2016/12/19]
44. McCracken JT, Poland RE, Lutchmansingh P, et al. Sleep electroencephalographic abnormalities in adolescent depressives: effects of scopolamine. *Biol Psychiatry* 1997;42(7):577-84. doi: 10.1016/S0006-3223(96)00431-3 [published Online First: 1997/10/06]
45. Rao U, McCracken JT, Lutchmansingh P, et al. Electroencephalographic sleep and urinary free cortisol in adolescent depression: a preliminary report of changes from episode to recovery. *Biol Psychiatry* 1997;41(3):369-73. [published Online First: 1997/02/01]
46. Rao U, Dahl RE, Ryan ND, et al. The relationship between longitudinal clinical course and sleep and cortisol changes in adolescent depression. *Biol Psychiatry* 1996;40(6):474-84. doi: 10.1016/0006-3223(95)00481-5 [published Online First: 1996/09/15]
47. Rao U, Dahl RE, Ryan ND, et al. Heterogeneity in EEG sleep findings in adolescent depression: unipolar versus bipolar clinical course. *J Affect Disord* 2002;70(3):273-80. [published Online First: 2002/07/20]
48. Rao U, Poland RE. Electroencephalographic sleep and hypothalamic-pituitary-adrenal changes from episode to recovery in depressed adolescents. *J Child Adolesc Psychopharmacol* 2008;18(6):607-13. doi: 10.1089/cap.2008.034 [published Online First: 2008/12/26]

- 1  
2  
3 49. Shain BN, Naylor M, Shipley JE, et al. Imipramine effects on sleep in depressed adolescents: a  
4 preliminary report. *Biol Psychiatry* 1990;28(5):459-62. [published Online First: 1990/09/01]  
5  
6  
7 50. Goetz RR, Wolk SI, Coplan JD, et al. Premorbid polysomnographic signs in depressed adolescents: a  
8 reanalysis of EEG sleep after longitudinal follow-up in adulthood. *Biol Psychiatry* 2001;49(11):930-  
9 42. [published Online First: 2001/05/30]  
10  
11  
12 51. Lovato N, Gradisar M. A meta-analysis and model of the relationship between sleep and depression in  
13 adolescents: recommendations for future research and clinical practice. *Sleep Med Rev*  
14 2014;18(6):521-9. doi: 10.1016/j.smrv.2014.03.006 [published Online First: 2014/05/27]  
15  
16  
17 52. Zisapel N. Paediatric use of melatonin: Letter to the Editor regarding the manuscript "Current role of  
18 melatonin in pediatric neurology: Clinical recommendations" by Bruni et al. *Eur J Paediatr Neurol*.  
19 2015 Mar;19(2):122-33. *Eur J Paediatr Neurol* 2017;21(2):418-19. doi: 10.1016/j.ejpn.2016.07.013  
20  
21  
22 [published Online First: 2016/08/16]  
23  
24  
25 53. Bruni O, Alonso-Alconada D, Besag F, et al. Current role of melatonin in pediatric neurology: clinical  
26 recommendations. *Eur J Paediatr Neurol* 2015;19(2):122-33. doi: 10.1016/j.ejpn.2014.12.007  
27  
28  
29 [published Online First: 2015/01/03]  
30  
31  
32 54. Ma ZR, Shi LJ, Deng MH. Efficacy of cognitive behavioral therapy in children and adolescents with  
33 insomnia: a systematic review and meta-analysis. *Braz J Med Biol Res* 2018;51(6):e7070. doi:  
34 10.1590/1414-431x20187070 [published Online First: 2018/05/24]  
35  
36  
37 55. Kalak N, Gerber M, Kirov R, et al. Daily morning running for 3 weeks improved sleep and psychological  
38 functioning in healthy adolescents compared with controls. *J Adolesc Health* 2012;51(6):615-22. doi:  
39 10.1016/j.jadohealth.2012.02.020 [published Online First: 2012/11/24]  
40  
41  
42 56. van Maanen A, Meijer AM, Smits MG, et al. Effects of Melatonin and Bright Light Treatment in Childhood  
43 Chronic Sleep Onset Insomnia With Late Melatonin Onset: A Randomized Controlled Study. *Sleep*  
44 2017;40(2) doi: 10.1093/sleep/zsw038 [published Online First: 2017/04/02]  
45  
46  
47 57. Meltzer LJ, Johnson C, Crosette J, et al. Prevalence of diagnosed sleep disorders in pediatric primary  
48 care practices. *Pediatrics* 2010;125(6):e1410-8. doi: 10.1542/peds.2009-2725 [published Online  
49 First: 2010/05/12]  
50  
51  
52 58. Meltzer LJ, Plaufcan MR, Thomas JH, et al. Sleep problems and sleep disorders in pediatric primary  
53 care: treatment recommendations, persistence, and health care utilization. *J Clin Sleep Med*  
54 2014;10(4):421-6. doi: 10.5664/jcsm.3620 [published Online First: 2014/04/16]  
55  
56  
57  
58  
59  
60

1  
2  
3  
4  
5  
6  
7  
8  
9  
10  
11  
12  
13  
14  
15  
16  
17  
18  
19  
20  
21  
22  
23  
24  
25  
26  
27  
28  
29  
30  
31  
32  
33  
34  
35  
36  
37  
38  
39  
40  
41  
42  
43  
44  
45  
46  
47  
48  
49  
50  
51  
52  
53  
54  
55  
56  
57  
58  
59  
60

59. Moher D, Shamseer L, Clarke M, et al. Preferred reporting items for systematic review and meta-analysis protocols (PRISMA-P) 2015 statement. *Syst Rev* 2015;4:1. doi: 10.1186/2046-4053-4-1 [published Online First: 2015/01/03]
60. Stroup DF, Berlin JA, Morton SC, et al. Meta-analysis of observational studies in epidemiology: a proposal for reporting. Meta-analysis Of Observational Studies in Epidemiology (MOOSE) group. *JAMA* 2000;283(15):2008-12. doi: 10.1001/jama.283.15.2008 [published Online First: 2000/05/02]
61. Bundy DAP, de Silva N, Horton S, et al. Investment in child and adolescent health and development: key messages from Disease Control Priorities, 3rd Edition. *Lancet* 2018;391(10121):687-99. doi: 10.1016/S0140-6736(17)32417-0 [published Online First: 2017/11/21]
62. Lai YC, Huang MC, Chen HC, et al. Familiarity and clinical outcomes of sleep disturbances in major depressive and bipolar disorders. *J Psychosom Res* 2014;76(1):61-7. doi: 10.1016/j.jpsychores.2013.10.020 [published Online First: 2013/12/24]
63. Paez A. Gray literature: An important resource in systematic reviews. *J Evid Based Med* 2017;10(3):233-40. doi: 10.1111/jebm.12266 [published Online First: 2017/09/01]
64. McLeod BD, Weisz JR. Using dissertations to examine potential bias in child and adolescent clinical trials. *J Consult Clin Psychol* 2004;72(2):235-51. doi: 10.1037/0022-006X.72.2.235 [published Online First: 2004/04/07]
65. Scherer RW, Langenberg P, von Elm E. Full publication of results initially presented in abstracts. *Cochrane Database Syst Rev* 2007(2):MR000005. doi: 10.1002/14651858.MR000005.pub3 [published Online First: 2007/04/20]
66. Viswanathan M, Berkman ND. Development of the RTI item bank on risk of bias and precision of observational studies. *J Clin Epidemiol* 2012;65(2):163-78. doi: 10.1016/j.jclinepi.2011.05.008 [published Online First: 2011/10/01]
67. Higgins JP, Thompson SG. Quantifying heterogeneity in a meta-analysis. *Stat Med* 2002;21(11):1539-58. doi: 10.1002/sim.1186 [published Online First: 2002/07/12]
68. Patsopoulos NA, Evangelou E, Ioannidis JP. Sensitivity of between-study heterogeneity in meta-analysis: proposed metrics and empirical evaluation. *Int J Epidemiol* 2008;37(5):1148-57. doi: 10.1093/ije/dyn065 [published Online First: 2008/04/22]
69. Gregory AM, Sadeh A. Sleep, emotional and behavioral difficulties in children and adolescents. *Sleep Med Rev* 2012;16(2):129-36. doi: 10.1016/j.smrv.2011.03.007 [published Online First: 2011/06/17]

- 1  
2  
3 70. Rao U, Chen LA. Characteristics, correlates, and outcomes of childhood and adolescent depressive  
4 disorders. *Dialogues Clin Neurosci* 2009;11(1):45-62. [published Online First: 2009/05/13]  
5  
6  
7 71. Galland BC, Taylor BJ, Elder DE, et al. Normal sleep patterns in infants and children: a systematic  
8 review of observational studies. *Sleep Med Rev* 2012;16(3):213-22. doi: 10.1016/j.smrv.2011.06.001  
9 [published Online First: 2011/07/26]  
10  
11  
12 72. Tarokh L, Saletin JM, Carskadon MA. Sleep in adolescence: Physiology, cognition and mental health.  
13 *Neurosci Biobehav Rev* 2016;70:182-88. doi: 10.1016/j.neubiorev.2016.08.008 [published Online  
14 First: 2016/10/22]  
15  
16  
17 73. Jenni OG, Molinari L, Cafilisch JA, et al. Sleep duration from ages 1 to 10 years: variability and stability in  
18 comparison with growth. *Pediatrics* 2007;120(4):e769-76. doi: 10.1542/peds.2006-3300 [published  
19 Online First: 2007/10/03]  
20  
21  
22 74. Iglowstein I, Jenni OG, Molinari L, et al. Sleep duration from infancy to adolescence: reference values  
23 and generational trends. *Pediatrics* 2003;111(2):302-7. doi: 10.1542/peds.111.2.302 [published  
24 Online First: 2003/02/04]  
25  
26  
27 75. Hummer DL, Lee TM. Daily timing of the adolescent sleep phase: Insights from a cross-species  
28 comparison. *Neurosci Biobehav Rev* 2016;70:171-81. doi: 10.1016/j.neubiorev.2016.07.023  
29 [published Online First: 2016/10/22]  
30  
31  
32 76. Matricciani L, Olds T, Petkov J. In search of lost sleep: secular trends in the sleep time of school-aged  
33 children and adolescents. *Sleep Med Rev* 2012;16(3):203-11. doi: 10.1016/j.smrv.2011.03.005  
34 [published Online First: 2011/05/27]  
35  
36  
37 77. Keyes KM, Maslowsky J, Hamilton A, et al. The great sleep recession: changes in sleep duration among  
38 US adolescents, 1991-2012. *Pediatrics* 2015;135(3):460-8. doi: 10.1542/peds.2014-2707 [published  
39 Online First: 2015/02/18]  
40  
41  
42 78. Adolescent Sleep Working G, Committee on A, Council on School H. School start times for adolescents.  
43 *Pediatrics* 2014;134(3):642-9. doi: 10.1542/peds.2014-1697 [published Online First: 2014/08/27]  
44  
45  
46 79. Stiglic N, Viner RM. Effects of screentime on the health and well-being of children and adolescents: a  
47 systematic review of reviews. *BMJ open* 2019;9(1):e023191. doi: 10.1136/bmjopen-2018-023191  
48 [published Online First: 2019/01/05]  
49  
50  
51  
52  
53  
54  
55  
56  
57  
58  
59  
60

1  
2  
3 1 exp Sleep Wake Disorders/  
4 2 exp Sleep/  
5 3 (apnea\$ adj3 sleep\$).mp.  
6 4 (restless adj3 leg\$ adj3 syndrome\$).mp.  
7 5 narcolep\$.mp.  
8 6 (night\$ adj3 terror\$).mp.  
9 7 sleep\$.mp.  
10 8 dyssomni\$.mp.  
11 9 parasomni\$.mp.  
12 10 insomni\$.mp.  
13 11 exp Depressive Disorder/  
14 12 exp Depression/  
15 13 depress\$.mp.  
16 14 exp Child/  
17 15 exp Adolescents/  
18 16 exp Young Adult/  
19 17 (child\$ or juvenile\$ or pubescen\$ or prepubescen\* or pre-pubescen\* or teen\$ or preteen\$ or tween\$  
20 or youth\$ or adoles\$ or young\$ adult\$ or emerg\$ adult\$).mp.  
21 18 exp Epidemiologic studies/  
22 19 exp Case control studies/  
23 20 exp Cohort studies/  
24 21 case control.tw.  
25 22 (cohort adj (study or studies)).tw.  
26 23 cohort analy\$.tw.  
27 24 (follow up adj (study or studies)).tw.  
28 25 (observational adj (study or studies)).tw.  
29 26 longitudinal.tw.  
30 27 retrospective.tw.  
31 28 cross sectional.tw.  
32 29 cross-sectional studies/  
33 30 or/1-10  
34 31 or/11-13  
35 32 or/14-17  
36 33 or/18-29  
37 34 30 and 31 and 32 and 33  
38 35 limit 34 to yr="1980 -Current"

# Reporting checklist for protocol of a systematic review.

Based on the PRISMA-P guidelines.

## Instructions to authors

Complete this checklist by entering the page numbers from your manuscript where readers will find each of the items listed below.

Your article may not currently address all the items on the checklist. Please modify your text to include the missing information. If you are certain that an item does not apply, please write "n/a" and provide a short explanation.

Upload your completed checklist as an extra file when you submit to a journal.

In your methods section, say that you used the PRISMA-Preporting guidelines, and cite them as:

Moher D, Shamseer L, Clarke M, Ghersi D, Liberati A, Petticrew M, Shekelle P, Stewart LA. Preferred Reporting Items for Systematic Review and Meta-Analysis Protocols (PRISMA-P) 2015 statement. *Syst Rev.* 2015;4(1):1.

| Reporting Item      |                                                                                                                                                               | Page Number |
|---------------------|---------------------------------------------------------------------------------------------------------------------------------------------------------------|-------------|
| <b>Title</b>        |                                                                                                                                                               |             |
| Identification      | <a href="#">#1a</a> Identify the report as a protocol of a systematic review                                                                                  | 1           |
| Update              | <a href="#">#1b</a> If the protocol is for an update of a previous systematic review, identify as such                                                        | n/a         |
| <b>Registration</b> |                                                                                                                                                               |             |
|                     | <a href="#">#2</a> If registered, provide the name of the registry (such as PROSPERO) and registration number                                                 | 2           |
| <b>Authors</b>      |                                                                                                                                                               |             |
| Contact             | <a href="#">#3a</a> Provide name, institutional affiliation, e-mail address of all protocol authors; provide physical mailing address of corresponding author | 1           |
| Contribution        | <a href="#">#3b</a> Describe contributions of protocol authors and identify the guarantor of the review                                                       | 12          |

## Amendments



|    |                      |                      |                                                                           |     |
|----|----------------------|----------------------|---------------------------------------------------------------------------|-----|
| 1  |                      | <a href="#">#4</a>   | If the protocol represents an amendment of a previously completed or      | n/a |
| 2  |                      |                      | published protocol, identify as such and list changes; otherwise, state   |     |
| 3  |                      |                      | plan for documenting important protocol amendments                        |     |
| 4  |                      |                      |                                                                           |     |
| 5  |                      |                      |                                                                           |     |
| 6  | <b>Support</b>       |                      |                                                                           |     |
| 7  |                      |                      |                                                                           |     |
| 8  | Sources              | <a href="#">#5a</a>  | Indicate sources of financial or other support for the review             | 12  |
| 9  |                      |                      |                                                                           |     |
| 10 | Sponsor              | <a href="#">#5b</a>  | Provide name for the review funder and / or sponsor                       | n/a |
| 11 |                      |                      |                                                                           |     |
| 12 | Role of sponsor or   | <a href="#">#5c</a>  | Describe roles of funder(s), sponsor(s), and / or institution(s), if any, | 12  |
| 13 | funder               |                      | in developing the protocol                                                |     |
| 14 |                      |                      |                                                                           |     |
| 15 |                      |                      |                                                                           |     |
| 16 |                      |                      |                                                                           |     |
| 17 | <b>Introduction</b>  |                      |                                                                           |     |
| 18 |                      |                      |                                                                           |     |
| 19 | Rationale            | <a href="#">#6</a>   | Describe the rationale for the review in the context of what is already   | 3-5 |
| 20 |                      |                      | known                                                                     |     |
| 21 |                      |                      |                                                                           |     |
| 22 | Objectives           | <a href="#">#7</a>   | Provide an explicit statement of the question(s) the review will          | 6   |
| 23 |                      |                      | address with reference to participants, interventions, comparators, and   |     |
| 24 |                      |                      | outcomes (PICO)                                                           |     |
| 25 |                      |                      |                                                                           |     |
| 26 |                      |                      |                                                                           |     |
| 27 |                      |                      |                                                                           |     |
| 28 | <b>Methods</b>       |                      |                                                                           |     |
| 29 |                      |                      |                                                                           |     |
| 30 | Eligibility criteria | <a href="#">#8</a>   | Specify the study characteristics (such as PICO, study design, setting,   | 6-7 |
| 31 |                      |                      | time frame) and report characteristics (such as years considered,         |     |
| 32 |                      |                      | language, publication status) to be used as criteria for eligibility for  |     |
| 33 |                      |                      | the review                                                                |     |
| 34 |                      |                      |                                                                           |     |
| 35 | Information sources  | <a href="#">#9</a>   | Describe all intended information sources (such as electronic             | 8   |
| 36 |                      |                      | databases, contact with study authors, trial registers or other grey      |     |
| 37 |                      |                      | literature sources) with planned dates of coverage                        |     |
| 38 |                      |                      |                                                                           |     |
| 39 | Search strategy      | <a href="#">#10</a>  | Present draft of search strategy to be used for at least one electronic   | 8   |
| 40 |                      |                      | database, including planned limits, such that it could be repeated        |     |
| 41 |                      |                      |                                                                           |     |
| 42 | Study records - data | <a href="#">#11a</a> | Describe the mechanism(s) that will be used to manage records and         | 9   |
| 43 | management           |                      | data throughout the review                                                |     |
| 44 |                      |                      |                                                                           |     |
| 45 | Study records -      | <a href="#">#11b</a> | State the process that will be used for selecting studies (such as two    | 9   |
| 46 | selection process    |                      | independent reviewers) through each phase of the review (that is,         |     |
| 47 |                      |                      | screening, eligibility and inclusion in meta-analysis)                    |     |
| 48 |                      |                      |                                                                           |     |
| 49 | Study records - data | <a href="#">#11c</a> | Describe planned method of extracting data from reports (such as          | 10  |
| 50 | collection process   |                      | piloting forms, done independently, in duplicate), any processes for      |     |
| 51 |                      |                      |                                                                           |     |
| 52 |                      |                      |                                                                           |     |
| 53 |                      |                      |                                                                           |     |
| 54 |                      |                      |                                                                           |     |
| 55 |                      |                      |                                                                           |     |
| 56 |                      |                      |                                                                           |     |
| 57 |                      |                      |                                                                           |     |
| 58 |                      |                      |                                                                           |     |
| 59 |                      |                      |                                                                           |     |
| 60 |                      |                      |                                                                           |     |

|    |                    |                                                                                           |       |
|----|--------------------|-------------------------------------------------------------------------------------------|-------|
|    |                    | obtaining and confirming data from investigators                                          |       |
| 1  |                    |                                                                                           |       |
| 2  |                    |                                                                                           |       |
| 3  | Data items         | <a href="#">#12</a> List and define all variables for which data will be sought (such as  | 10    |
| 4  |                    | PICO items, funding sources), any pre-planned data assumptions and                        |       |
| 5  |                    | simplifications                                                                           |       |
| 6  |                    |                                                                                           |       |
| 7  |                    |                                                                                           |       |
| 8  | Outcomes and       | <a href="#">#13</a> List and define all outcomes for which data will be sought, including | 9-10  |
| 9  | prioritization     | prioritization of main and additional outcomes, with rationale                            |       |
| 10 |                    |                                                                                           |       |
| 11 | Risk of bias in    | <a href="#">#14</a> Describe anticipated methods for assessing risk of bias of individual | 10    |
| 12 | individual studies | studies, including whether this will be done at the outcome or study                      |       |
| 13 |                    | level, or both; state how this information will be used in data synthesis                 |       |
| 14 |                    |                                                                                           |       |
| 15 |                    |                                                                                           |       |
| 16 |                    |                                                                                           |       |
| 17 | Data synthesis     | <a href="#">#15a</a> Describe criteria under which study data will be quantitatively      | 10-11 |
| 18 |                    | synthesised                                                                               |       |
| 19 |                    |                                                                                           |       |
| 20 |                    |                                                                                           |       |
| 21 | Data synthesis     | <a href="#">#15b</a> If data are appropriate for quantitative synthesis, describe planned | 10-11 |
| 22 |                    | summary measures, methods of handling data and methods of                                 |       |
| 23 |                    | combining data from studies, including any planned exploration of                         |       |
| 24 |                    | consistency (such as I <sup>2</sup> , Kendall's $\tau$ )                                  |       |
| 25 |                    |                                                                                           |       |
| 26 |                    |                                                                                           |       |
| 27 | Data synthesis     | <a href="#">#15c</a> Describe any proposed additional analyses (such as sensitivity or    | 10-11 |
| 28 |                    | subgroup analyses, meta-regression)                                                       |       |
| 29 |                    |                                                                                           |       |
| 30 |                    |                                                                                           |       |
| 31 | Data synthesis     | <a href="#">#15d</a> If quantitative synthesis is not appropriate, describe the type of   | 10-11 |
| 32 |                    | summary planned                                                                           |       |
| 33 |                    |                                                                                           |       |
| 34 |                    |                                                                                           |       |
| 35 | Meta-bias(es)      | <a href="#">#16</a> Specify any planned assessment of meta-bias(es) (such as publication  | 10-11 |
| 36 |                    | bias across studies, selective reporting within studies)                                  |       |
| 37 |                    |                                                                                           |       |
| 38 |                    |                                                                                           |       |
| 39 | Confidence in      | <a href="#">#17</a> Describe how the strength of the body of evidence will be assessed    | 11    |
| 40 | cumulative         | (such as GRADE)                                                                           |       |
| 41 | evidence           |                                                                                           |       |
| 42 |                    |                                                                                           |       |
| 43 |                    |                                                                                           |       |

The PRISMA-P checklist is distributed under the terms of the Creative Commons Attribution License CC-BY 4.0. This checklist was completed on 26. September 2019 using <https://www.goodreports.org/>, a tool made by the [EQUATOR Network](#) in collaboration with [Penelope.ai](#)
